# Supplementary material for: Electronic structure, cold ion–atom elastic collision properties and possibility of laser cooling of BeCs+ molecular ion
Source: Royal Society of Chemistry journal article supplement (doi:10.1039/d2cp00808d), 2022-01-01
Supplement: d2cp00808d1.pdf [file d2cp00808d1.pdf]

## Supplementary material: Electronic structure, cold ion-atom elastic collisions proprieties and possibility of laser cooling of BeCs<sup>+</sup> molecular ion

Hela Ladjimi<sup>1\*</sup>, Wissem Zrafi<sup>1</sup>, Mohamed Farjallah<sup>1</sup>, Hamid Berriche<sup>1,2</sup>

<sup>1</sup>Laboratory of Interfaces and Advanced Materials, Faculty of Science, University of Monastir, 5019 Monastir, Tunisia

<sup>2</sup>Department of Mathematics and Natural Sciences, School of Arts and Sciences, American University of Ras Al Khaimah, RAK, P.O. Box 10021, UAE

\*Corresponding author: E-mail address: [helaladjimi91@gmail.com](mailto:helaladjimi91@gmail.com)

**S.Table 1.** The exponents and contraction coefficients of the primitive Gaussian orbitals for Beryllium and Cesium atoms.

| Orbitals | Beryllium: Be |                          | Cesium: Cs |                          |
|----------|---------------|--------------------------|------------|--------------------------|
|          | Exponents     | Contraction coefficients | Exponents  | Contraction coefficients |
| s        | 4.930000      | 1                        | 0.328926   | 0.411589                 |
|          | 1.280000      | 1                        | 0.241529   | 0.682422                 |
|          | 0.423000      | 1                        | 0.505020   | 1                        |
|          | 0.141000      | 1                        | 0.029302   | 1                        |
|          | 0.028500      | 1                        | 0.013282   | 1                        |
|          | 0.016250      | 1                        | 0.005280   | 1                        |
|          | 0.000992      | 1                        | 0.003000   | 1                        |
| p        | 5.230000      | 1                        | 0.120000   | 1                        |
|          | 1.440000      | 1                        | 0.065500   | 1                        |
|          | 0.494100      | 1                        | 0.016200   | 1                        |
|          | 0.202400      | 1                        | 0.004430   | 1                        |
|          | 0.092300      | 1                        |            |                          |
|          | 0.061150      | 1                        |            |                          |
|          | 0.032300      | 1                        |            |                          |
|          | 0.010910      | 1                        |            |                          |
|          | 0.007910      | 1                        |            |                          |
| d        | 1.280000      | 1                        | 0.196894   | 0.189650                 |
|          | 0.410000      | 1                        | 0.067471   | 0.227240                 |
|          | 0.180000      | 1                        | 0.027948   | 1                        |
|          | 0.140000      | 1                        | 0.010712   | 1                        |
|          | 0.110000      | 1                        | 0.003000   | 1                        |
|          | 0.056900      | 1                        |            |                          |
|          | 0.020200      | 1                        |            |                          |
|          | 0.011160      | 1                        |            |                          |
|          | 0.022796      | 0.49521                  |            |                          |

|  |          |          |  |  |
|--|----------|----------|--|--|
|  | 0.008574 | 0.549272 |  |  |
|--|----------|----------|--|--|

**S. Table 2.** Avoided crossing's position  $R_c$  between electronic states of the molecular ion  $\text{BeCs}^+$ .

| States                    | $R_c(\text{Bohr})$ |
|---------------------------|--------------------|
| $2^1\Sigma^+/3^1\Sigma^+$ | 22.50              |
| $3^1\Sigma^+/4^1\Sigma^+$ | 30.21              |
| $4^1\Sigma^+/5^1\Sigma^+$ | 10.94              |
| $5^1\Sigma^+/6^1\Sigma^+$ | 5.78               |
|                           | 18.60              |
| $6^1\Sigma^+/7^1\Sigma^+$ | 5.52               |
|                           | 14.72              |
| $2^3\Pi/3^3\Pi$           | 6.68               |

**S. Table 3.** Interaction Energy ( $\text{cm}^{-1}$ ) as a function of internuclear distances  $R$  (Bohr) of 1- $7^1\Sigma^+$  electronic states of the molecular ion  $\text{BeCs}^+$ .

| $R(\text{Bohr})$ | $1^1\Sigma^+$ | $2^1\Sigma^+$ | $3^1\Sigma^+$ | $4^1\Sigma^+$ | $5^1\Sigma^+$ | $6^1\Sigma^+$ | $7^1\Sigma^+$ |
|------------------|---------------|---------------|---------------|---------------|---------------|---------------|---------------|
| 5                | 4227.7469     | 49746.642     | 57023.336     | 64366.75      | 77146.34      | 64104.395     | 82242.33      |
| 5.4545455        | 1370.6014     | 45809.975     | 55426.125     | 62138.301     | 73277.267     | 62359.287     | 79775.386     |
| 5.9090909        | -341.66272    | 43155.11      | 54120.819     | 60056.68      | 68360.716     | 61082.351     | 70754.785     |
| 6.3636364        | -1155.057     | 41575.129     | 53030.447     | 58362.932     | 66351.143     | 60122.812     | 68807.969     |
| 6.8181818        | -1467.7491    | 40606.926     | 52032.594     | 57106.996     | 64700.771     | 58922.98      | 67322.814     |
| 7.2727273        | -1500.391     | 39979.746     | 51101.96      | 56261.359     | 63327.596     | 57553.6       | 66132.764     |
| 7.7272727        | -1394.999     | 39533.596     | 50267.062     | 55740.054     | 62151.022     | 56495.445     | 65122.209     |
| 8.1818182        | -1237.9747    | 39189.819     | 49536.21      | 55432.59      | 61102.73      | 55696.631     | 64239.454     |
| 8.6363636        | -1071.7163    | 38933.548     | 48902.721     | 55270.13      | 60153.927     | 55097.158     | 63467.197     |
| 9.0909091        | -916.84684    | 38768.204     | 48346.472     | 55196.566     | 59296.359     | 54652.255     | 62798.234     |
| 9.5454545        | -781.93456    | 38695.431     | 47846.324     | 55157.1       | 58540.24      | 54328.111     | 62224.675     |
| 10               | -667.42348    | 38707.708     | 47387.506     | 55102.271     | 57905.845     | 54098.831     | 61736.342     |
| 10.454545        | -572.3908     | 38797.773     | 46964.457     | 54982.777     | 57427.569     | 53944.656     | 61320.688     |
| 10.909091        | -494.09143    | 38950.92      | 46573.826     | 54769.893     | 57117.025     | 53849.977     | 60966.245     |
| 11.363636        | -429.39286    | 39151.706     | 46213.714     | 54477.506     | 56946.639     | 53802.005     | 60663.199     |
| 11.818182        | -375.82626    | 39388.369     | 45884.702     | 54144.501     | 56870.627     | 53791.303     | 60402.814     |
| 12.272727        | -331.23433    | 39648.897     | 45585.589     | 53808.094     | 56844.909     | 53809.873     | 60177.263     |
| 12.727273        | -293.80719    | 39924.658     | 45316.3       | 53490.826     | 56842.738     | 53851.505     | 59980.624     |
| 13.181818        | -262.26515    | 40207.64      | 45075.746     | 53203.608     | 56849.435     | 53910.529     | 59805.924     |
| 13.636364        | -235.04347    | 40491.533     | 44861.448     | 52949.612     | 56857.137     | 53982.764     | 59645.782     |
| 14.090909        | -211.91511    | 40770.036     | 44675.861     | 52736.399     | 56860.681     | 54064.634     | 59487.484     |
| 14.545455        | -191.67368    | 41040.693     | 44512.194     | 52555.672     | 56858.368     | 54152.56      | 59306.028     |
| 15               | -173.16577    | 41302.342     | 44364.677     | 52400.315     | 56849.731     | 54243.904     | 59079.817     |
| 15.454545        | -158.87994    | 41532.91      | 44256.615     | 52310.61      | 56816.531     | 54336.271     | 58831.216     |
| 15.909091        | -144.59412    | 41763.479     | 44148.553     | 52220.904     | 56783.33      | 54427.748     | 58587.497     |
| 16.363636        | -130.79889    | 41987.313     | 44046.821     | 52142.475     | 56744.052     | 54516.677     | 58366.964     |
| 16.818182        | -119.66999    | 42180.443     | 43971.673     | 52111.614     | 56676.942     | 54601.913     | 58179.155     |
| 17.272727        | -110.22326    | 42342.504     | 43917.306     | 52119.54      | 56582.539     | 54682.621     | 58023.777     |
| 17.727273        | -101.52226    | 42492.597     | 43870.351     | 52141.742     | 56478.502     | 54758.103     | 57899.629     |
| 18.181818        | -92.821273    | 42642.689     | 43823.395     | 52163.945     | 56374.465     | 54828.194     | 57802.226     |
| 18.636364        | -85.295966    | 42771.438     | 43788.285     | 52208.943     | 56259.723     | 54892.773     | 57726.808     |
| 19.090909        | -78.647869    | 42878.067     | 43764.678     | 52275.798     | 56138.345     | 54951.908     | 57668.6       |
| 19.545455        | -72.705607    | 42970.316     | 43748.33      | 52355.831     | 56018.46      | 55005.633     | 57623.341     |
| 20               | -67.33262     | 43048.947     | 43738.099     | 52446.855     | 55903.112     | 55054.233     | 57587.288     |
| 20.454545        | -62.445027    | 43116.022     | 43732.921     | 52546.492     | 55793.943     | 55097.996     | 57558.592     |
| 20.909091        | -58.106719    | 43173.144     | 43731.887     | 52652.62      | 55691.719     | 55137.361     | 57535.081     |
| 21.363636        | -55.800089    | 43193.477     | 43738.141     | 52746.812     | 55649.485     | 55172.544     | 57515.306     |
| 21.818182        | -53.688182    | 43210.512     | 43744.967     | 52839.608     | 55612.894     | 55203.769     | 57498.445     |
| 22.272727        | -51.576275    | 43227.548     | 43751.793     | 52932.403     | 55576.304     | 55231.714     | 57484.333     |
| 22.727273        | -49.464368    | 43244.583     | 43758.619     | 53025.199     | 55539.713     | 55278.561     | 57472.803     |
| 23.181818        | -47.35246     | 43261.618     | 43765.445     | 53117.994     | 55503.122     | 55297.934     | 57463.69      |

|           |            |           |           |           |           |           |           |
|-----------|------------|-----------|-----------|-----------|-----------|-----------|-----------|
| 23.636364 | -45.240553 | 43278.654 | 43772.27  | 53210.79  | 55466.531 | 55315.14  | 57456.827 |
| 24.090909 | -43.128646 | 43295.689 | 43779.096 | 53303.586 | 55429.94  | 55330.501 | 57452.05  |
| 24.545455 | -41.016739 | 43312.724 | 43785.922 | 53396.381 | 55393.349 | 55344.231 | 57449.192 |
| 25        | -38.904832 | 43329.76  | 43792.748 | 53489.177 | 55356.758 | 55356.455 | 57448.088 |
| 25.454545 | -36.792924 | 43346.795 | 43799.574 | 53581.972 | 55320.168 | 55367.17  | 57448.572 |
| 25.909091 | -34.681017 | 43363.83  | 43806.399 | 53674.768 | 55283.577 | 55376.95  | 57450.478 |
| 26.363636 | -32.56911  | 43380.865 | 43813.225 | 53767.563 | 55246.986 | 55385.604 | 57453.641 |
| 26.818182 | -30.457203 | 43397.901 | 43820.051 | 53860.359 | 55210.395 | 55393.496 | 57457.894 |
| 27.272727 | -28.345295 | 43414.936 | 43826.877 | 53953.155 | 55173.804 | 55400.573 | 57463.072 |
| 27.727273 | -26.233388 | 43431.971 | 43833.702 | 54045.95  | 55137.213 | 55406.789 | 57469.01  |
| 28.181818 | -24.121481 | 43449.007 | 43840.528 | 54138.746 | 55100.622 | 55412.488 | 57475.541 |
| 28.636364 | -22.009574 | 43466.042 | 43847.354 | 54231.541 | 55064.032 | 55417.776 | 57482.499 |
| 29.090909 | -19.897667 | 43483.077 | 43854.18  | 54324.337 | 55027.441 | 55422.503 | 57489.72  |
| 29.545455 | -17.897189 | 43498.908 | 43860.722 | 54412.143 | 54995.257 | 55426.716 | 57497.037 |
| 30        | -16.962282 | 43504.052 | 43864.305 | 54451.591 | 55004.354 | 55430.888 | 57504.847 |
| 30.454545 | -16.107185 | 43508.897 | 43867.868 | 54487.647 | 55014.758 | 55434.41  | 57512.643 |
| 30.909091 | -15.343298 | 43513.423 | 43871.137 | 54518.348 | 55027.27  | 55437.51  | 57520.376 |
| 31.363636 | -14.437607 | 43517.605 | 43873.985 | 54544.189 | 55041.487 | 55440.648 | 57528.072 |
| 31.818182 | -13.69923  | 43521.526 | 43876.728 | 54566.737 | 55056.624 | 55443.399 | 57535.457 |
| 32.272727 | -13.022848 | 43525.326 | 43879.268 | 54586.042 | 55072.475 | 55445.958 | 57542.84  |
| 32.727273 | -12.294121 | 43528.895 | 43881.601 | 54602.871 | 55088.349 | 55448.324 | 57549.813 |
| 33.181818 | -11.555691 | 43532.075 | 43883.96  | 54617.358 | 55104.383 | 55450.346 | 57556.606 |
| 33.636364 | -10.980401 | 43535.253 | 43885.982 | 54630.081 | 55120.142 | 55452.324 | 57562.978 |
| 34.090909 | -10.481594 | 43538.014 | 43887.751 | 54641.228 | 55135.359 | 55454.179 | 57569.176 |
| 34.545455 | -9.9647351 | 43540.764 | 43889.599 | 54651.02  | 55150.1   | 55455.916 | 57574.932 |
| 35        | -9.437425  | 43543.414 | 43891.333 | 54659.913 | 55164.241 | 55457.372 | 57580.338 |
| 35.454545 | -8.857859  | 43545.86  | 43892.788 | 54667.985 | 55177.758 | 55458.801 | 57585.667 |
| 35.909091 | -8.5259212 | 43548.144 | 43894.223 | 54675.154 | 55190.632 | 55460.054 | 57590.551 |
| 36.363636 | -8.0363321 | 43550.272 | 43895.692 | 54681.653 | 55202.853 | 55461.173 | 57594.966 |
| 36.818182 | -7.7150744 | 43552.385 | 43896.841 | 54687.673 | 55214.435 | 55462.484 | 57599.431 |
| 37.272727 | -7.2056208 | 43554.17  | 43898.098 | 54693.042 | 55225.226 | 55463.366 | 57603.34  |
| 37.727273 | -6.803725  | 43556.031 | 43899.23  | 54698.297 | 55235.872 | 55464.397 | 57607.381 |
| 38.181818 | -6.4685268 | 43557.858 | 43900.227 | 54702.951 | 55245.68  | 55465.161 | 57611.104 |
| 38.636364 | -6.1802165 | 43559.432 | 43901.225 | 54707.281 | 55255.051 | 55465.998 | 57614.337 |
| 39.090909 | -5.8670183 | 43561.077 | 43902.141 | 54711.418 | 55263.927 | 55466.719 | 57617.571 |
| 39.545455 | -5.6458496 | 43562.518 | 43903.083 | 54715.185 | 55272.341 | 55467.481 | 57620.623 |
| 40        | -5.2674    | 43563.843 | 43903.81  | 54718.723 | 55280.423 | 55467.791 | 57623.665 |
| 40.454545 | -5.0831599 | 43565.229 | 43904.643 | 54722.051 | 55287.719 | 55468.631 | 57626.338 |
| 40.909091 | -4.8709016 | 43566.609 | 43905.386 | 54725.235 | 55295.042 | 55469.309 | 57628.817 |
| 41.363636 | -4.6442752 | 43567.806 | 43906.087 | 54728.021 | 55301.664 | 55469.734 | 57631.276 |
| 41.818182 | -4.4140566 | 43568.957 | 43906.778 | 54730.706 | 55308.11  | 55470.089 | 57633.698 |
| 42.272727 | -4.1838381 | 43570.108 | 43907.469 | 54733.392 | 55314.556 | 55470.517 | 57635.98  |
| 42.727273 | -3.9616346 | 43571.115 | 43908.031 | 54735.741 | 55320.257 | 55470.972 | 57638.049 |
| 43.181818 | -3.7399427 | 43572.112 | 43908.585 | 54738.069 | 55325.91  | 55471.371 | 57639.985 |
| 43.636364 | -3.4916477 | 43573.11  | 43909.086 | 54740.197 | 55331.164 | 55471.713 | 57641.883 |
| 44.090909 | -3.2614292 | 43574.061 | 43909.569 | 54742.231 | 55336.221 | 55472.013 | 57643.709 |

|           |            |           |           |           |           |           |           |
|-----------|------------|-----------|-----------|-----------|-----------|-----------|-----------|
| 44.545455 | -3.1079502 | 43574.829 | 43909.992 | 54743.919 | 55340.557 | 55472.277 | 57645.417 |
| 45        | -2.9544712 | 43575.596 | 43910.414 | 54745.607 | 55344.893 | 55472.508 | 57647.019 |
| 45.454545 | -2.8009921 | 43576.364 | 43910.836 | 54747.296 | 55349.229 | 55472.709 | 57648.538 |
| 45.909091 | -2.6475131 | 43577.131 | 43911.258 | 54748.984 | 55353.565 | 55472.883 | 57649.993 |
| 46.363636 | -2.4940341 | 43577.899 | 43911.68  | 54750.672 | 55357.9   | 55473.035 | 57651.407 |
| 46.818182 | -2.3743205 | 43578.617 | 43912.059 | 54752.189 | 55361.871 | 55473.182 | 57652.798 |
| 47.272727 | -2.291186  | 43579.282 | 43912.392 | 54753.519 | 55365.445 | 55473.368 | 57654.158 |
| 47.727273 | -2.2080515 | 43579.947 | 43912.724 | 54754.849 | 55369.02  | 55473.601 | 57655.447 |
| 48.181818 | -1.9998673 | 43580.638 | 43912.972 | 54756.036 | 55372.321 | 55473.747 | 57656.624 |
| 48.636364 | -1.891923  | 43581.212 | 43913.33  | 54757.159 | 55375.415 | 55473.812 | 57657.674 |
| 49.090909 | -1.7986881 | 43581.772 | 43913.703 | 54758.278 | 55378.492 | 55473.889 | 57658.678 |
| 49.545455 | -1.7558    | 43582.293 | 43913.981 | 54759.321 | 55381.386 | 55473.994 | 57659.74  |
| 50        | -1.7558    | 43582.782 | 43914.176 | 54760.299 | 55384.125 |           | 57660.842 |

**S. Table 4.** Interaction Energy ( $\text{cm}^{-1}$ ) as a function of internuclear distances  $R$  (Bohr) of  $(1-5)^3\Sigma^+$  electronic states of the molecular ion  $\text{BeCs}^+$ .

| $R(\text{Bohr})$ | $1^3\Sigma^+$ | $2^3\Sigma^+$ | $3^3\Sigma^+$ | $4^3\Sigma^+$ | $5^3\Sigma^+$ |
|------------------|---------------|---------------|---------------|---------------|---------------|
| 5                | 28211.317     | 55709.559     | 69942.951     | 75490.84      | 84198.072     |
| 5.4545455        | 24525.992     | 53602.918     | 67242.212     | 71926.047     | 80382.12      |
| 5.9090909        | 22127.27      | 52015.156     | 65059.533     | 69240.173     | 77363.182     |
| 6.3636364        | 20692.003     | 50758.542     | 63338.769     | 67183.093     | 75015.557     |
| 6.8181818        | 19917.476     | 49659.132     | 61952.126     | 65522.107     | 73102.214     |
| 7.2727273        | 19585.031     | 48613.194     | 60768.039     | 64104.956     | 71135.02      |
| 7.7272727        | 19532.497     | 47579.845     | 59671.761     | 62861.99      | 68679.493     |
| 8.1818182        | 19644.888     | 46566.59      | 58589.21      | 61801.327     | 66590.231     |
| 8.6363636        | 19847.863     | 45609.16      | 57512.945     | 60951.539     | 65020.526     |
| 9.0909091        | 20092.058     | 44746.623     | 56486.181     | 60296.008     | 63827.44      |
| 9.5454545        | 20345.816     | 44011.165     | 55553.478     | 59791.732     | 62889.374     |
| 10               | 20590.267     | 43411.277     | 54726.75      | 59387.74      | 62122.399     |
| 10.454545        | 20814.53      | 42951.816     | 54006.113     | 59048.651     | 61491.268     |
| 10.909091        | 21013.614     | 42620.522     | 53378.322     | 58742.989     | 60971.791     |
| 11.363636        | 21187.478     | 42398.54      | 52829.807     | 58449.524     | 60547.646     |
| 11.818182        | 21336.79      | 42270.035     | 52352.878     | 58156.754     | 60209.578     |
| 12.272727        | 21464.189     | 42215.943     | 51938.705     | 57861.119     | 59943.198     |
| 12.727273        | 21572.866     | 42220.545     | 51582.092     | 57565.07      | 59735.049     |
| 13.181818        | 21665.268     | 42269.062     | 51278.119     | 57272.6       | 59571.847     |
| 13.636364        | 21744.76      | 42348.311     | 51021.732     | 56987.838     | 59441.592     |
| 14.090909        | 21811.695     | 42450.203     | 50817.14      | 56716.211     | 59339.688     |
| 14.545455        | 21870.106     | 42563.266     | 50652.028     | 56456.832     | 59255.252     |
| 15               | 21922.699     | 42680.206     | 50517         | 56208.206     | 59181.653     |
| 15.454545        | 21962.683     | 42794.413     | 50456.026     | 55991.285     | 59128.66      |
| 15.909091        | 22002.668     | 42908.62      | 50395.052     | 55774.364     | 59075.667     |
| 16.363636        | 22040.872     | 43020.389     | 50346.093     | 55563.553     | 59024.919     |

|           |           |           |           |           |           |
|-----------|-----------|-----------|-----------|-----------|-----------|
| 16.818182 | 22071.619 | 43119.732 | 50347.931 | 55379.715 | 58983.204 |
| 17.272727 | 22096.783 | 43203.216 | 50386.294 | 55222.968 | 58944.498 |
| 17.727273 | 22120.261 | 43280.4   | 50437.675 | 55076.626 | 58906.619 |
| 18.181818 | 22143.738 | 43357.583 | 50489.056 | 54930.284 | 58868.74  |
| 18.636364 | 22164.212 | 43423.545 | 50558.82  | 54803.888 | 58830.944 |
| 19.090909 | 22181.547 | 43477.289 | 50645.191 | 54700.849 | 58791.793 |
| 19.545455 | 22197.293 | 43524.886 | 50737.621 | 54610.943 | 58751.287 |
| 20        | 22212.176 | 43568.583 | 50832.455 | 54530.597 | 58709.481 |
| 20.454545 | 22225.233 | 43604.93  | 50930.283 | 54468.922 | 58664.288 |
| 20.909091 | 22237.235 | 43636.795 | 51027.775 | 54420.523 | 58616.123 |
| 21.363636 | 22248.041 | 43664.528 | 51122.822 | 54385.506 | 58564.937 |
| 21.818182 | 22258.017 | 43689.034 | 51214.126 | 54362.95  | 58511.153 |
| 22.272727 | 22266.871 | 43709.966 | 51299.43  | 54354.046 | 58455.808 |
| 22.727273 | 22275.191 | 43728.745 | 51379.437 | 54354.419 | 58401.334 |
| 23.181818 | 22283.066 | 43745.898 | 51455.096 | 54361.85  | 58347.944 |
| 23.636364 | 22290.116 | 43760.905 | 51523.282 | 54379.367 | 58298.597 |
| 24.090909 | 22296.638 | 43773.915 | 51584.601 | 54404.658 | 58254.73  |
| 24.545455 | 22302.65  | 43785.779 | 51640.308 | 54435.343 | 58216.471 |
| 25        | 22308.268 | 43796.456 | 51689.886 | 54471.037 | 58185.322 |
| 25.454545 | 22313.414 | 43805.983 | 51733.969 | 54510.203 | 58160.885 |
| 25.909091 | 22318.228 | 43814.613 | 51773.374 | 54551.524 | 58143.347 |
| 26.363636 | 22322.755 | 43822.348 | 51808.385 | 54594.328 | 58132.438 |
| 26.818182 | 22326.807 | 43829.384 | 51839.334 | 54637.538 | 58128.087 |
| 27.272727 | 22330.686 | 43835.712 | 51866.968 | 54680.556 | 58129.36  |
| 27.727273 | 22334.331 | 43841.506 | 51891.568 | 54722.721 | 58135.839 |
| 28.181818 | 22337.673 | 43847.055 | 51913.581 | 54763.772 | 58147.254 |
| 28.636364 | 22340.819 | 43851.943 | 51933.252 | 54803.167 | 58162.671 |
| 29.090909 | 22343.812 | 43856.292 | 51950.93  | 54840.787 | 58181.546 |
| 29.545455 | 22346.585 | 43860.502 | 51967.031 | 54876.362 | 58203.383 |
| 30        | 22349.171 | 43864.305 | 51981.024 | 54909.353 | 58227.501 |
| 30.454545 | 22351.736 | 43867.868 | 51994.278 | 54941.277 | 58252.726 |
| 30.909091 | 22354.008 | 43871.137 | 52006.357 | 54970.926 | 58279.043 |
| 31.363636 | 22356.038 | 43873.985 | 52017.191 | 54998.337 | 58305.516 |
| 31.818182 | 22358.173 | 43876.728 | 52027.103 | 55024.038 | 58331.654 |
| 32.272727 | 22360.037 | 43879.268 | 52036.193 | 55047.957 | 58356.761 |
| 32.727273 | 22361.858 | 43881.598 | 52044.716 | 55070.098 | 58380.213 |
| 33.181818 | 22363.558 | 43883.817 | 52052.257 | 55090.938 | 58401.28  |
| 33.636364 | 22365.367 | 43885.982 | 52059.417 | 55110.027 | 58419.715 |
| 34.090909 | 22366.857 | 43887.751 | 52066.088 | 55127.89  | 58434.733 |
| 34.545455 | 22368.188 | 43889.599 | 52072.148 | 55144.699 | 58446.663 |
| 35        | 22369.667 | 43891.333 | 52077.829 | 55160.187 | 58455.785 |
| 35.454545 | 22370.929 | 43892.788 | 52082.965 | 55174.825 | 58462.366 |
| 35.909091 | 22372.251 | 43894.223 | 52087.865 | 55188.47  | 58467.041 |
| 36.363636 | 22373.315 | 43895.692 | 52092.524 | 55201.266 | 58470.266 |
| 36.818182 | 22374.464 | 43896.841 | 52096.752 | 55213.305 | 58472.515 |
| 37.272727 | 22375.416 | 43898.098 | 52100.626 | 55224.434 | 58473.786 |

|           |           |           |           |           |           |
|-----------|-----------|-----------|-----------|-----------|-----------|
| 37.727273 | 22376.414 | 43899.23  | 52104.482 | 55235.273 | 58474.724 |
| 38.181818 | 22377.412 | 43900.227 | 52107.97  | 55245.241 | 58475.059 |
| 38.636364 | 22378.409 | 43901.225 | 52111.251 | 55254.796 | 58475.163 |
| 39.090909 | 22379.266 | 43902.141 | 52114.253 | 55263.708 | 58475.163 |
| 39.545455 | 22380.047 | 43903.083 | 52117.237 | 55272.182 | 58475.103 |
| 40        | 22380.775 | 43903.81  | 52119.889 | 55280.234 | 58474.724 |
| 40.454545 | 22381.608 | 43904.643 | 52122.383 | 55287.719 | 58474.448 |
| 40.909091 | 22382.35  | 43905.386 | 52124.824 | 55295.042 | 58474.13  |
| 41.363636 | 22382.99  | 43906.087 | 52127.031 | 55301.664 | 58473.759 |
| 41.818182 | 22383.604 | 43906.778 | 52129.18  | 55308.11  | 58473.375 |
| 42.272727 | 22384.218 | 43907.469 | 52131.329 | 55314.556 | 58472.991 |
| 42.727273 | 22384.776 | 43908.031 | 52133.229 | 55320.257 | 58472.656 |
| 43.181818 | 22385.331 | 43908.585 | 52135.114 | 55325.91  | 58472.323 |
| 43.636364 | 22385.951 | 43909.086 | 52136.745 | 55331.164 | 58472.071 |
| 44.090909 | 22386.534 | 43909.569 | 52138.318 | 55336.221 | 58471.817 |
| 44.545455 | 22386.956 | 43909.992 | 52139.7   | 55340.557 | 58471.549 |
| 45        | 22387.378 | 43910.414 | 52141.081 | 55344.893 | 58471.28  |
| 45.454545 | 22387.8   | 43910.836 | 52142.462 | 55349.229 | 58471.012 |
| 45.909091 | 22388.223 | 43911.258 | 52143.843 | 55353.565 | 58470.743 |
| 46.363636 | 22388.645 | 43911.68  | 52145.225 | 55357.9   | 58470.475 |
| 46.818182 | 22389.064 | 43912.059 | 52146.462 | 55361.871 | 58470.255 |
| 47.272727 | 22389.48  | 43912.392 | 52147.542 | 55365.445 | 58470.089 |
| 47.727273 | 22389.895 | 43912.724 | 52148.623 | 55369.02  | 58469.923 |
| 48.181818 | 22390.156 | 43912.972 | 52149.576 | 55372.321 | 58469.701 |
| 48.636364 | 22390.514 | 43913.33  | 52150.508 | 55375.415 | 58469.593 |
| 49.090909 | 22390.887 | 43913.703 | 52151.44  | 55378.492 | 58469.5   |
| 49.545455 | 22391.217 | 43913.981 | 52152.344 | 55381.386 | 58469.404 |
| 50        | 22391.511 | 43914.176 | 52153.224 | 55384.125 | 58469.306 |

**S. Table 5.** Interaction Energy ( $\text{cm}^{-1}$ ) as a function of internuclear distances  $R$  (Bohr) of (1-4)  $^1\Pi$  and (1-3)  $^3\Pi$  electronic states of the molecular ion  $\text{BeCs}^+$ .

| $R(\text{Bohr})$ | $^1\Pi$   | $2^1\Pi$  | $3^1\Pi$  | $4^1\Pi$  | $1^3\Pi$  | $2^3\Pi$  | $3^3\Pi$  |
|------------------|-----------|-----------|-----------|-----------|-----------|-----------|-----------|
| 5                | 46037.656 | 61181.286 | 70745.617 | 79188.751 | 24416.819 | 64104.395 | 70311.011 |
| 5.4545455        | 44454.831 | 58753.391 | 68270.258 | 75348.633 | 23060.031 | 62359.287 | 67214.021 |
| 5.9090909        | 43457.712 | 56888.796 | 66459.405 | 72370.652 | 22277.917 | 61082.351 | 63638.665 |
| 6.3636364        | 42904.84  | 55523.302 | 65145.947 | 70036.255 | 21905.37  | 60122.812 | 61061.653 |
| 6.8181818        | 42660.838 | 54575.356 | 64163.955 | 68164.085 | 21783.16  | 58922.98  | 59719.426 |
| 7.2727273        | 42608.285 | 53955.303 | 63383.053 | 66625.056 | 21792.669 | 57553.6   | 59284.74  |
| 7.7272727        | 42660.148 | 53578.338 | 62716.404 | 65348.592 | 21859.661 | 56495.445 | 59084.282 |
| 8.1818182        | 42760.432 | 53372.934 | 62111.092 | 64300.433 | 21943.07  | 55696.631 | 59029.621 |
| 8.6363636        | 42876.271 | 53282.04  | 61542.331 | 63456.279 | 22023.112 | 55097.158 | 59075.553 |
| 9.0909091        | 42989.678 | 53262.981 | 61007.657 | 62785.482 | 22092.625 | 54652.255 | 59187.725 |
| 9.5454545        | 43092.553 | 53286.288 | 60517.467 | 62249.889 | 22149.827 | 54328.111 | 59338.526 |
| 10               | 43182.346 | 53332.886 | 60081.72  | 61813.378 | 22195.728 | 54098.831 | 59507.354 |
| 10.454545        | 43258.101 | 53392.057 | 59702.941 | 61448.837 | 22232.614 | 53944.656 | 59678.666 |

|           |           |           |           |           |           |           |           |
|-----------|-----------|-----------|-----------|-----------|-----------|-----------|-----------|
| 10.909091 | 43321.19  | 53458.421 | 59377.321 | 61137.38  | 22261.917 | 53849.977 | 59842.214 |
| 11.363636 | 43373.225 | 53529.841 | 59097.562 | 60867.126 | 22285.387 | 53802.005 | 59991.659 |
| 11.818182 | 43415.91  | 53605.725 | 58856.604 | 60629.799 | 22304.408 | 53791.303 | 60124.208 |
| 12.272727 | 43450.689 | 53686.04  | 58647.47  | 60419.518 | 22319.755 | 53809.873 | 60109.59  |
| 12.727273 | 43479.108 | 53770.886 | 58464.611 | 60232.379 | 22332.299 | 53851.505 | 59927.449 |
| 13.181818 | 43502.371 | 53859.884 | 58304.22  | 60065.269 | 22342.678 | 53910.529 | 59758.71  |
| 13.636364 | 43521.327 | 53952.58  | 58162.373 | 59915.388 | 22351.49  | 53982.764 | 59603.138 |
| 14.090909 | 43536.909 | 54047.67  | 58037.103 | 59781.013 | 22358.938 | 54064.634 | 59459.818 |
| 14.545455 | 43549.66  | 54144.738 | 57926.446 | 59659.759 | 22365.158 | 54152.56  | 59327.696 |
| 15        | 43559.859 | 54241.709 | 57829.248 | 59550.81  | 22370.427 | 54243.904 | 59206.454 |
| 15.454545 | 43568.55  | 54337.65  | 57743.837 | 59452.132 | 22375.131 | 54336.271 | 59095.103 |
| 15.909091 | 43575.474 | 54430.988 | 57669.784 | 59363.038 | 22379.289 | 54427.748 | 58994.078 |
| 16.363636 | 43581.168 | 54520.781 | 57606.229 | 59282.213 | 22382.574 | 54516.677 | 58902.651 |
| 16.818182 | 43585.869 | 54606.502 | 57552.23  | 59208.926 | 22385.712 | 54601.913 | 58820.851 |
| 17.272727 | 43589.799 | 54687.095 | 57507.222 | 59142.626 | 22388.446 | 54682.621 | 58748.408 |
| 17.727273 | 43593.114 | 54762.352 | 57470.758 | 59082.009 | 22390.624 | 54758.103 | 58685.61  |
| 18.181818 | 43595.786 | 54832.346 | 57442.032 | 59026.718 | 22392.595 | 54828.194 | 58632.567 |
| 18.636364 | 43597.83  | 54896.843 | 57420.296 | 58976.637 | 22394.521 | 54892.773 | 58588.522 |
| 19.090909 | 43599.838 | 54955.747 | 57404.747 | 58931.195 | 22395.986 | 54951.908 | 58551.799 |
| 19.545455 | 43601.382 | 55009.139 | 57394.963 | 58890.049 | 22397.19  | 55005.633 | 58526.174 |
| 20        | 43602.633 | 55057.274 | 57390.416 | 58852.762 | 22398.251 | 55054.233 | 58505.885 |
| 20.454545 | 43603.504 | 55100.982 | 57389.874 | 58818.967 | 22399.306 | 55097.996 | 58492.786 |
| 20.909091 | 43604.361 | 55139.821 | 57392.741 | 58788.515 | 22400.2   | 55137.361 | 58485.443 |
| 21.363636 | 43605.078 | 55174.735 | 57398.477 | 58761.149 | 22400.941 | 55172.544 | 58483.059 |
| 21.818182 | 43605.729 | 55205.744 | 57406.285 | 58736.65  | 22401.372 | 55203.769 | 58484.588 |
| 22.272727 | 43606.262 | 55233.358 | 57416     | 58714.563 | 22402.021 | 55231.714 | 58489.138 |
| 22.727273 | 43606.569 | 55257.881 | 57426.866 | 58694.434 | 22402.501 | 55256.526 | 58495.904 |
| 23.181818 | 43606.902 | 55279.589 | 57438.253 | 58676.42  | 22402.738 | 55278.561 | 58503.825 |
| 23.636364 | 43607.043 | 55298.81  | 57450.289 | 58660.204 | 22403.113 | 55297.934 | 58512.214 |
| 24.090909 | 43607.238 | 55315.965 | 57462.296 | 58645.513 | 22403.396 | 55315.14  | 58520.422 |
| 24.545455 | 43607.479 | 55331.165 | 57474.204 | 58632.282 | 22403.559 | 55330.501 | 58528.052 |
| 25        | 43607.488 | 55344.672 | 57485.729 | 58620.106 | 22403.835 | 55344.231 | 58534.396 |
| 25.454545 | 43607.488 | 55356.784 | 57497.106 | 58608.997 | 22403.977 | 55356.455 | 58539.425 |
| 25.909091 | 43607.488 | 55367.57  | 57507.85  | 58598.954 | 22404.233 | 55367.17  | 58543.162 |
| 26.363636 | 43607.488 | 55377.179 | 57517.888 | 58589.784 | 22404.199 | 55376.95  | 58545.313 |
| 26.818182 | 43607.488 | 55385.844 | 57527.547 | 58581.37  | 22404.436 | 55385.604 | 58546.406 |
| 27.272727 | 43607.488 | 55393.615 | 57536.775 | 58573.628 | 22404.445 | 55393.496 | 58546.181 |
| 27.727273 | 43607.488 | 55400.572 | 57545.237 | 58566.434 | 22404.443 | 55400.573 | 58545.215 |
| 28.181818 | 43607.488 | 55407.016 | 57553.232 | 58559.776 | 22404.666 | 55406.789 | 58543.233 |
| 28.636364 | 43607.252 | 55412.755 | 57560.683 | 58553.858 | 22404.666 | 55412.488 | 58541.17  |
| 29.090909 | 43607.268 | 55417.776 | 57567.718 | 58548.132 | 22404.666 | 55417.776 | 58538.425 |
| 29.545455 | 43607.223 | 55422.48  | 57574.22  | 58543.141 | 22404.666 | 55422.503 | 58535.44  |
| 30        | 43607.096 | 55427.135 | 57580.285 | 58538.293 | 22404.666 | 55426.716 | 58532.45  |
| 30.454545 | 43607.069 | 55430.914 | 57585.947 | 58533.982 | 22404.666 | 55430.888 | 58529.456 |
| 30.909091 | 43606.828 | 55434.408 | 57591.441 | 58529.74  | 22404.666 | 55434.41  | 58526.462 |
| 31.363636 | 43606.852 | 55437.703 | 57596.295 | 58526.026 | 22404.666 | 55437.51  | 58523.341 |

|           |           |           |           |           |           |           |           |
|-----------|-----------|-----------|-----------|-----------|-----------|-----------|-----------|
| 31.818182 | 43606.594 | 55440.654 | 57601.135 | 58522.56  | 22404.666 | 55440.648 | 58520.657 |
| 32.272727 | 43606.629 | 55443.4   | 57605.461 | 58519.283 | 22404.666 | 55443.399 | 58517.749 |
| 32.727273 | 43606.391 | 55445.957 | 57609.53  | 58516.222 | 22404.666 | 55445.958 | 58515.124 |
| 33.181818 | 43606.396 | 55448.322 | 57613.451 | 58513.491 | 22404.666 | 55448.324 | 58512.695 |
| 33.636364 | 43606.17  | 55450.348 | 57616.989 | 58510.738 | 22404.666 | 55450.346 | 58510.078 |
| 34.090909 | 43606.184 | 55452.325 | 57620.469 | 58508.505 | 22404.666 | 55452.324 | 58507.839 |
| 34.545455 | 43605.928 | 55454.179 | 57623.734 | 58506.109 | 22404.666 | 55454.179 | 58505.784 |
| 35        | 43605.959 | 55455.915 | 57626.864 | 58504.076 | 22404.666 | 55455.916 | 58503.67  |
| 35.454545 | 43605.721 | 55457.372 | 57629.72  | 58502.021 | 22404.666 | 55457.372 | 58501.818 |
| 35.909091 | 43605.724 | 55458.8   | 57632.322 | 58500.29  | 22404.665 | 55458.801 | 58500.07  |
| 36.363636 | 43605.497 | 55460.054 | 57634.956 | 58498.524 | 22404.681 | 55460.054 | 58498.29  |
| 36.818182 | 43605.512 | 55461.174 | 57637.385 | 58496.864 | 22404.467 | 55461.173 | 58496.844 |
| 37.272727 | 43605.431 | 55462.484 | 57639.64  | 58495.302 | 22404.458 | 55462.484 | 58495.29  |
| 37.727273 | 43605.293 | 55463.366 | 57641.717 | 58493.978 | 22404.447 | 55463.366 | 58493.978 |
| 38.181818 | 43605.123 | 55464.397 | 57643.719 | 58492.674 | 22404.447 | 55464.397 | 58492.674 |
| 38.636364 | 43605.072 | 55465.161 | 57645.692 | 58491.326 | 22404.447 | 55465.161 | 58491.326 |
| 39.090909 | 43605.024 | 55465.997 | 57647.514 | 58490.169 | 22404.446 | 55465.998 | 58490.169 |
| 39.545455 | 43604.866 | 55466.718 | 57649.346 | 58489.288 | 22404.395 | 55466.719 | 58489.288 |
| 40        | 43604.854 | 55467.477 | 57651.068 | 58488.106 | 22404.227 | 55467.481 | 58488.106 |
| 40.454545 | 43604.792 | 55467.792 | 57652.518 | 58487.648 | 22404.219 | 55467.791 | 58487.648 |
| 40.909091 | 43604.66  | 55468.631 | 57654.033 | 58486.389 | 22404.224 | 55468.631 | 58486.389 |
| 41.363636 | 43604.557 | 55469.308 | 57655.445 | 58485.312 | 22404.25  | 55469.309 | 58485.312 |
| 41.818182 | 43604.487 | 55469.734 | 57656.742 | 58484.58  | 22404.269 | 55469.734 | 58484.58  |
| 42.272727 | 43604.42  | 55470.089 | 57657.984 | 58483.979 | 22404.231 | 55470.089 | 58483.979 |
| 42.727273 | 43604.321 | 55470.517 | 57659.218 | 58483.331 | 22404.118 | 55470.517 | 58483.331 |
| 43.181818 | 43604.2   | 55470.972 | 57660.425 | 58482.652 | 22404.01  | 55470.972 | 58482.652 |
| 43.636364 | 43604.071 | 55471.371 | 57661.573 | 58482.004 | 22403.996 | 55471.371 | 58482.004 |
| 44.090909 | 43603.956 | 55471.713 | 57662.66  | 58481.416 | 22404.008 | 55471.713 | 58481.416 |
| 44.545455 | 43603.865 | 55472.013 | 57663.688 | 58480.895 | 22403.976 | 55472.013 | 58480.895 |
| 45        | 43603.792 | 55472.277 | 57664.662 | 58480.426 | 22403.915 | 55472.277 | 58480.426 |
| 45.454545 | 43603.729 | 55472.508 | 57665.586 | 58479.988 | 22403.845 | 55472.508 | 58479.988 |
| 45.909091 | 43603.665 | 55472.709 | 57666.464 | 58479.562 | 22403.79  | 55472.709 | 58479.562 |
| 46.363636 | 43603.587 | 55472.884 | 57667.297 | 58479.129 | 22403.773 | 55472.883 | 58479.129 |
| 46.818182 | 43603.485 | 55473.035 | 57668.091 | 58478.67  | 22403.818 | 55473.035 | 58478.67  |
| 47.272727 | 43603.383 | 55473.182 | 57668.85  | 58478.216 | 22403.872 | 55473.182 | 58478.216 |
| 47.727273 | 43603.32  | 55473.368 | 57669.576 | 58477.844 | 22403.816 | 55473.368 | 58477.844 |
| 48.181818 | 43603.32  | 55473.601 | 57670.275 | 58477.601 | 22403.591 | 55473.601 | 58477.601 |
| 48.636364 | 43603.249 | 55473.747 | 57670.95  | 58477.352 | 22403.492 | 55473.747 | 58477.352 |
| 49.090909 | 43603.136 | 55473.812 | 57671.597 | 58477.06  | 22403.536 | 55473.812 | 58477.06  |
| 49.545455 | 43603.081 | 55473.889 | 57672.214 | 58476.752 | 22403.595 | 55473.889 | 58476.752 |
| 50        | 43603.089 | 55473.994 | 57672.802 | 58476.454 | 22403.6   | 55473.994 | 58476.454 |

**S. Table 6.** Interaction Energy ( $\text{cm}^{-1}$ ) as a function of internuclear distances  $R$  (Bohr) of (1-2)  $^1\Delta$  and (1)  $^3\Delta$  electronic states of the molecular ion  $\text{BeCs}^+$ .

| $R(\text{Bohr})$ | $1\ ^1\Delta$ | $2\ ^1\Delta$ | $1\ ^3\Delta$ |
|------------------|---------------|---------------|---------------|
| 5                | 58776.09      | 69149.987     | 65934.899     |
| 5.4545455        | 58570.494     | 67389.544     | 64265.086     |
| 5.9090909        | 58367.485     | 65963.469     | 63068.864     |
| 6.3636364        | 58235.114     | 64832.387     | 62242.942     |
| 6.8181818        | 58167.228     | 63929.298     | 61666.996     |
| 7.2727273        | 58138.976     | 63195.046     | 61247.175     |
| 7.7272727        | 58129.851     | 62585.843     | 60923.256     |
| 8.1818182        | 58127.139     | 62071.712     | 60659.998     |
| 8.6363636        | 58125.146     | 61632.703     | 60438.586     |
| 9.0909091        | 58121.678     | 61255.238     | 60248.548     |
| 9.5454545        | 58116.29      | 60929.288     | 60083.268     |
| 10               | 58109.298     | 60647.307     | 59939.061     |
| 10.454545        | 58100.922     | 60402.771     | 59812.393     |
| 10.909091        | 58091.327     | 60190.61      | 59700.787     |
| 11.363636        | 58080.917     | 60006.3       | 59601.687     |
| 11.818182        | 58070.018     | 59845.714     | 59513.465     |
| 12.272727        | 58057.806     | 59705.863     | 59434.144     |
| 12.727273        | 58045.337     | 59583.652     | 59362.826     |
| 13.181818        | 58031.923     | 59476.674     | 59298.296     |
| 13.636364        | 58018.772     | 59383.181     | 59239.162     |
| 14.090909        | 58004.886     | 59300.88      | 59185.635     |
| 14.545455        | 57991.006     | 59228.407     | 59136.347     |
| 15               | 57977.174     | 59164.315     | 59091.23      |
| 15.454545        | 57963.473     | 59107.595     | 59049.802     |
| 15.909091        | 57950.093     | 59057.027     | 59011.516     |
| 16.363636        | 57937.082     | 59011.97      | 58976.236     |
| 16.818182        | 57924.599     | 58971.723     | 58943.892     |
| 17.272727        | 57911.995     | 58935.775     | 58913.499     |
| 17.727273        | 57900.688     | 58903.165     | 58885.789     |
| 18.181818        | 57889.896     | 58873.69      | 58860.47      |
| 18.636364        | 57879.104     | 58847.082     | 58836.866     |
| 19.090909        | 57869.34      | 58822.82      | 58815.165     |
| 19.545455        | 57859.906     | 58800.731     | 58794.709     |
| 20               | 57851.022     | 58780.515     | 58775.749     |
| 20.454545        | 57842.734     | 58761.823     | 58758.241     |
| 20.909091        | 57834.747     | 58744.681     | 58742.146     |
| 21.363636        | 57827.335     | 58728.952     | 58727.007     |
| 21.818182        | 57820.504     | 58714.477     | 58712.91      |
| 22.272727        | 57814.031     | 58701.084     | 58699.861     |
| 22.727273        | 57807.693     | 58688.607     | 58687.651     |
| 23.181818        | 57801.545     | 58676.958     | 58676.18      |
| 23.636364        | 57795.822     | 58666.109     | 58665.534     |
| 24.090909        | 57790.772     | 58656.031     | 58655.617     |

|           |           |           |           |
|-----------|-----------|-----------|-----------|
| 24.545455 | 57786.429 | 58646.679 | 58646.422 |
| 25        | 57782.364 | 58637.979 | 58637.754 |
| 25.454545 | 57778.144 | 58629.849 | 58629.709 |
| 25.909091 | 57773.874 | 58622.218 | 58621.991 |
| 26.363636 | 57769.914 | 58615.027 | 58614.929 |
| 26.818182 | 57766.35  | 58608.266 | 58608.247 |
| 27.272727 | 57763.177 | 58601.937 | 58601.926 |
| 27.727273 | 57760.383 | 58596.041 | 58596.035 |
| 28.181818 | 57757.746 | 58590.541 | 58590.488 |
| 28.636364 | 57754.77  | 58585.343 | 58585.234 |
| 29.090909 | 57751.611 | 58580.389 | 58580.387 |
| 29.545455 | 57749.246 | 58575.683 | 58575.691 |
| 30        | 57747.351 | 58571.242 | 58571.041 |
| 30.454545 | 57745.222 | 58567.084 | 58567.084 |
| 30.909091 | 57742.418 | 58563.205 | 58563.102 |
| 31.363636 | 57739.832 | 58559.505 | 58559.387 |
| 31.818182 | 57737.928 | 58555.942 | 58555.92  |
| 32.272727 | 57736.447 | 58552.549 | 58552.635 |
| 32.727273 | 57735.102 | 58549.364 | 58549.365 |
| 33.181818 | 57733.652 | 58546.406 | 58546.402 |
| 33.636364 | 57732.046 | 58543.623 | 58543.66  |
| 34.090909 | 57730.284 | 58540.944 | 58540.903 |
| 34.545455 | 57728.624 | 58538.361 | 58538.387 |
| 35        | 57727.68  | 58535.944 | 58535.946 |
| 35.454545 | 57726.907 | 58533.558 | 58533.495 |
| 35.909091 | 57725.739 | 58531.185 | 58531.445 |
| 36.363636 | 57724.311 | 58528.991 | 58529.15  |
| 36.818182 | 57722.762 | 58527.141 | 58527.167 |
| 37.272727 | 57721.35  | 58525.518 | 58525.509 |
| 37.727273 | 57720.367 | 58523.641 | 58523.547 |
| 38.181818 | 57719.667 | 58521.726 | 58521.66  |
| 38.636364 | 57719.074 | 58520     | 58520.191 |
| 39.090909 | 57718.308 | 58518.45  | 58518.448 |
| 39.545455 | 57717.215 | 58516.963 | 58517.015 |
| 40        | 57716.122 | 58515.516 | 58515.516 |
| 40.454545 | 57714.736 | 58514.103 | 58514.096 |
| 40.909091 | 57710.738 | 58512.739 | 58512.738 |
| 41.363636 | 57701.471 | 58511.443 | 58511.446 |
| 41.818182 | 57684.276 | 58510.212 | 58510.214 |
| 42.272727 | 57656.497 | 58509.031 | 58509.032 |
| 42.727273 | 57615.474 | 58507.894 | 58507.893 |
| 43.181818 | 57558.552 | 58506.81  | 58506.81  |
| 43.636364 | 57483.071 | 58505.792 | 58505.792 |
| 44.090909 | 57386.375 | 58504.82  | 58504.82  |
| 44.545455 | 57265.805 | 58503.875 | 58503.875 |
| 45        | 57118.704 | 58502.957 | 58502.957 |

|           |           |           |           |
|-----------|-----------|-----------|-----------|
| 45.454545 | 56942.415 | 58502.067 | 58502.067 |
| 45.909091 | 56734.279 | 58501.207 | 58501.207 |
| 46.363636 | 56491.638 | 58500.38  | 58500.38  |
| 46.818182 | 56211.837 | 58499.588 | 58499.588 |
| 47.272727 | 55892.215 | 58498.83  | 58498.83  |
| 47.727273 | 55530.117 | 58498.103 | 58498.103 |
| 48.181818 | 55122.884 | 58497.403 | 58497.403 |
| 48.636364 | 54667.858 | 58496.725 | 58496.725 |
| 49.090909 | 54162.382 | 58496.078 | 58496.078 |
| 49.545455 | 53603.798 | 58495.473 | 58495.473 |
| 50        | 52989.449 | 58494.893 | 58494.893 |

**S. Table 7.** Permanent electric dipole moments data of (1-7)  $^1\Sigma^+$  electronic states of the BeCs<sup>+</sup> molecular ion.

| <i>R</i> (Bohr) | $1^1\Sigma^+$ | $2^1\Sigma^+$ | $3^1\Sigma^+$ | $4^1\Sigma^+$ | $5^1\Sigma^+$ | $7^1\Sigma^+$ | $8^1\Sigma^+$ |
|-----------------|---------------|---------------|---------------|---------------|---------------|---------------|---------------|
| 5               | -0.320414     | -0.91276      | -3.491588     | -2.994222     | 0.001755      | -0.988639     | -0.227337     |
| 5.2525253       | -0.33987467   | -0.96038834   | -3.792387     | -2.8003744    | -0.48787573   | -0.89906817   | -0.048811535  |
| 5.5050505       | -0.34907152   | -1.0122883    | -4.1078895    | -2.5213308    | -0.84669952   | -0.94659786   | 0.11491252    |
| 5.7575758       | -0.348201     | -1.0675266    | -4.4300528    | -2.1797828    | -1.0729415    | -1.2749354    | -3.5714112    |
| 6.010101        | -0.33891432   | -1.1250741    | -4.7442078    | -1.8201245    | -1.2270343    | 0.047629848   | -3.9190594    |
| 6.2626263       | -0.32192204   | -1.1852489    | -5.0280949    | -1.4889087    | -1.378222     | -0.22586477   | -4.3077552    |
| 6.5151515       | -0.29861545   | -1.2492168    | -5.2588473    | -1.227314     | -1.5830302    | -0.29797385   | -4.6629935    |
| 6.7676768       | -0.26978846   | -1.3193045    | -5.4166167    | -1.0657493    | -1.8729901    | -0.29618004   | -4.9423658    |
| 7.020202        | -0.23654336   | -1.3979532    | -5.5007511    | -1.0064839    | -2.2538844    | -0.23919119   | -5.1337849    |
| 7.2727273       | -0.19972245   | -1.4876376    | -5.5232927    | -1.0347148    | -2.7224354    | -0.117932     | -5.2383819    |
| 7.5252525       | -0.16011497   | -1.5905242    | -5.5037842    | -1.1258707    | -5.2631906    | 0.089149815   | -3.2702107    |
| 7.7777778       | -0.11862956   | -1.7064466    | -5.4626688    | -1.2532513    | -5.2243804    | 0.38725789    | -3.8781251    |
| 8.030303        | -0.075901788  | -1.8354058    | -5.412542     | -1.4015062    | -5.1329825    | 0.68606509    | -4.5287557    |
| 8.2828283       | -0.032586182  | -1.9755231    | -5.3617242    | -1.5612402    | -5.0046662    | 0.66994167    | -5.1978344    |
| 8.5353535       | 0.010774737   | -2.1247162    | -5.3147686    | -1.730134     | -4.8525621    | 0.32356678    | -5.8610059    |
| 8.7878788       | 0.053744515   | -2.2803072    | -5.2737542    | -1.9102982    | -4.6867897    | -2.7594665    | -6.4982142    |
| 9.040404        | 0.09594901    | -2.4400726    | -5.2399611    | -2.1087838    | -4.5102051    | -2.39777      | -7.0938318    |
| 9.2929293       | 0.13716772    | -2.6018121    | -5.2134801    | -4.1676302    | -2.4859421    | -2.1745368    | -7.6430128    |
| 9.5454545       | 0.17713539    | -2.7638452    | -5.1950353    | -4.1010254    | -2.6024962    | -2.0448009    | -8.1420302    |
| 9.7979798       | 0.21583173    | -2.9248461    | -5.1841978    | -3.8424619    | -2.9240593    | -1.973291     | -8.5983947    |
| 10.050505       | 0.25324974    | -3.0839512    | -5.1808846    | -3.5329673    | -3.306677     | -1.9433819    | -9.0192251    |
| 10.30303        | 0.28929144    | -3.2402928    | -5.1858486    | -3.1653382    | -3.7550198    | -1.9476091    | -9.4090018    |
| 10.555556       | 0.32395748    | -3.3932205    | -5.1995379    | -2.7553338    | -4.2499852    | -1.9785526    | -9.7748077    |
| 10.808081       | 0.35738401    | -3.5425864    | -5.2216235    | -4.1856852    | -2.9059277    | -2.0288967    | -10.124359    |
| 11.060606       | 0.38964273    | -3.6881849    | -5.2521997    | -5.2193972    | -1.957826     | -2.0939358    | -10.462912    |
| 11.313131       | 0.42077378    | -3.8297577    | -5.2915946    | -5.6264609    | -1.6340509    | -2.1698975    | -10.79472     |
| 11.565657       | 0.45086201    | -3.9672295    | -5.3397805    | -5.9654901    | -1.3747486    | -2.2528984    | -11.123831    |
| 11.818182       | 0.47996374    | -4.1004109    | -5.3969864    | -6.2427826    | -1.1725882    | -2.3395814    | -11.453692    |

|           |            |             |            |            |             |            |            |
|-----------|------------|-------------|------------|------------|-------------|------------|------------|
| 12.070707 | 0.50820873 | -4.22948    | -5.4626671 | -6.4738905 | -1.0117353  | -2.4269976 | -11.786812 |
| 12.323232 | 0.53563399 | -4.3541698  | -5.5371546 | -6.6688566 | -0.8816868  | -2.5126706 | -12.125337 |
| 12.575758 | 0.56230893 | -4.4743863  | -5.620379  | -6.8371814 | -0.77301118 | -2.5945103 | -12.470311 |
| 12.828283 | 0.58833144 | -4.5902202  | -5.7118651 | -6.9865714 | -0.67861215 | -2.671058  | -12.821002 |
| 13.080808 | 0.61369682 | -4.7010685  | -5.812376  | -7.1201948 | -0.59554906 | -2.7402851 | -13.174474 |
| 13.333333 | 0.63847758 | -4.8068     | -5.9217034 | -7.2420473 | -0.52097308 | -2.8010782 | -13.519583 |
| 13.585859 | 0.66273586 | -4.9072888  | -6.0396372 | -7.3547519 | -0.45361755 | -2.8527717 | -13.831447 |
| 13.838384 | 0.68651698 | -5.002254   | -6.1661944 | -7.4600309 | -0.39333905 | -2.8947863 | -14.053579 |
| 14.090909 | 0.70967476 | -5.0880987  | -6.3059066 | -7.5568653 | -0.34596056 | -2.9218048 | -13.794619 |
| 14.343434 | 0.73239078 | -5.1665619  | -6.4558279 | -7.6481882 | -0.3099899  | -2.9373321 | -12.967915 |
| 14.59596  | 0.75510679 | -5.2450251  | -6.6057491 | -7.7395111 | -0.27401924 | -2.9528594 | -12.14121  |
| 14.848485 | 0.7774317  | -5.315222   | -6.7663632 | -7.8264692 | -0.25366329 | -2.9573102 | -10.776339 |
| 15.10101  | 0.79905026 | -5.3646112  | -6.9518122 | -7.9065723 | -0.28571801 | -2.9421181 | -10.127382 |
| 15.353535 | 0.82020092 | -5.3965293  | -7.1571628 | -7.9827329 | -0.36820554 | -2.9145082 | -10.977154 |
| 15.606061 | 0.84135158 | -5.4284473  | -7.3625134 | -8.0588936 | -0.45069306 | -2.8868984 | -11.826927 |
| 15.858586 | 0.86250223 | -5.4603653  | -7.5678639 | -8.1350543 | -0.53318059 | -2.8592885 | -12.676699 |
| 16.111111 | 0.88365289 | -5.4922834  | -7.7732145 | -8.2112149 | -0.61566811 | -2.8316787 | -13.526471 |
| 16.363636 | 0.90450794 | -5.5083989  | -7.9955882 | -8.2854439 | -0.7502158  | -2.7983299 | -14.264647 |
| 16.616162 | 0.92487374 | -5.4954187  | -8.2488869 | -8.3567579 | -0.98008542 | -2.7570423 | -14.819524 |
| 16.868687 | 0.94506357 | -5.4675872  | -8.517407  | -8.427428  | -1.2545085  | -2.7153131 | -15.320552 |
| 17.121212 | 0.96489652 | -5.3986953  | -8.8271539 | -8.4973991 | -1.5992845  | -2.6775807 | -15.748217 |
| 17.373737 | 0.98448509 | -5.2986605  | -9.1679912 | -8.5670515 | -1.9839188  | -2.6439196 | -16.133635 |
| 17.626263 | 1.0040737  | -5.1986258  | -9.5088286 | -8.6367038 | -2.368553   | -2.6102586 | -16.519052 |
| 17.878788 | 1.0236622  | -5.098591   | -9.8496659 | -8.7063561 | -2.7531873  | -2.5765975 | -16.904469 |
| 18.131313 | 1.0432508  | -4.9985563  | -10.190503 | -8.7760084 | -3.1378216  | -2.5429364 | -17.289887 |
| 18.383838 | 1.0627493  | -4.8838088  | -10.545876 | -8.8456363 | -3.5245002  | -2.5119129 | -17.663797 |
| 18.636364 | 1.0818682  | -4.7053762  | -10.964108 | -8.9151626 | -3.9132867  | -2.4925192 | -17.990556 |
| 18.888889 | 1.1008856  | -4.5064535  | -11.402435 | -8.9846508 | -4.2894546  | -2.4772968 | -18.307434 |
| 19.141414 | 1.1082424  | -4.3031456  | -11.855184 | -9.0615716 | -4.6421706  | -2.4784916 | -18.610167 |
| 19.393939 | 0.96506086 | -4.3600194  | -12.185386 | -9.2368243 | -4.9143032  | -2.6273965 | -18.867454 |
| 19.646465 | 1.1572328  | -3.761158   | -12.862515 | -9.1918272 | -5.3067451  | -2.4638904 | -19.195905 |
| 19.89899  | 1.1758198  | -3.4731543  | -13.387662 | -9.2600278 | -5.6132507  | -2.4690874 | -19.476292 |
| 20.151515 | 1.1943021  | -3.1679448  | -13.929355 | -9.3273637 | -5.9036752  | -2.479621  | -19.749043 |
| 20.40404  | 1.2126956  | -2.8513561  | -14.481819 | -9.3936284 | -6.1812537  | -2.4948978 | -20.015445 |
| 20.656566 | 1.2310118  | -2.5283924  | -15.040116 | -9.458697  | -6.4488089  | -2.5142712 | -20.276621 |
| 20.909091 | 1.2492416  | -2.2032059  | -15.600013 | -9.5220241 | -6.7065102  | -2.5382409 | -20.532188 |
| 21.161616 | 1.2673946  | -1.8814881  | -16.155858 | -9.5832944 | -6.9566842  | -2.5663607 | -20.782936 |
| 21.414141 | 1.2854665  | -1.5693434  | -16.701514 | -9.6418125 | -7.2005928  | -2.5987223 | -21.02897  |
| 21.666667 | 1.3034626  | -1.2711507  | -17.23262  | -9.697137  | -7.439832   | -2.63503   | -21.27074  |
| 21.919192 | 1.3214043  | -0.98829342 | -17.747958 | -9.7492192 | -7.6775348  | -2.6739801 | -21.509787 |
| 22.171717 | 1.3392617  | -0.72914199 | -18.238919 | -9.7962893 | -7.9128624  | -2.7170146 | -21.744626 |
| 22.424242 | 1.3571192  | -0.46999057 | -18.72988  | -9.8433593 | -8.1481901  | -2.7600491 | -21.979465 |
| 22.676768 | 1.3748382  | -0.26149306 | -19.169063 | -9.8777571 | -8.3863325  | -2.8087829 | -22.208715 |
| 22.929293 | 1.3925479  | -0.05636671 | -19.604799 | -9.9113115 | -8.6246623  | -2.8578959 | -22.437593 |
| 23.181818 | 1.4102242  | 0.13562038  | -20.027122 | -9.9404344 | -8.8654572  | -2.9080225 | -22.665492 |
| 23.434343 | 1.4278297  | 0.29984375  | -20.421101 | -9.9601532 | -9.1115064  | -2.9602812 | -22.891331 |

|           |           |            |            |            |            |            |            |
|-----------|-----------|------------|------------|------------|------------|------------|------------|
| 23.686869 | 1.4453754 | 0.4420165  | -20.792553 | -9.969701  | -9.3647811 | -3.0135933 | -23.116112 |
| 23.939394 | 1.4628774 | 0.56823654 | -21.14769  | -9.9700201 | -9.6252207 | -3.0672888 | -23.340392 |
| 24.191919 | 1.480326  | 0.6772081  | -21.485156 | -9.957561  | -9.8962184 | -3.1208624 | -23.564543 |
| 24.444444 | 1.497743  | 0.77665873 | -21.812851 | -9.9362273 | -10.174848 | -3.1740197 | -23.788858 |
| 24.69697  | 1.5151167 | 0.86369448 | -22.127786 | -9.901217  | -10.465499 | -3.2262363 | -24.013648 |
| 24.949495 | 1.53245   | 0.94044071 | -22.432115 | -9.8514648 | -10.769453 | -3.2770371 | -24.239235 |
| 25.20202  | 1.5497388 | 1.0075074  | -22.726432 | -9.7833797 | -11.090284 | -3.3256804 | -24.466055 |
| 25.454545 | 1.5669949 | 1.0679164  | -23.013835 | -9.6990096 | -11.426313 | -3.3721738 | -24.694094 |
| 25.707071 | 1.5842163 | 1.1221433  | -23.294796 | -9.5956913 | -11.780183 | -3.4159789 | -24.923629 |
| 25.959596 | 1.6014036 | 1.1710833  | -23.57022  | -9.4717215 | -12.153652 | -3.4567044 | -25.154864 |
| 26.212121 | 1.6185528 | 1.214937   | -23.840287 | -9.3217185 | -12.551984 | -3.4933766 | -25.388138 |
| 26.464646 | 1.6356769 | 1.2556948  | -24.107073 | -9.1518666 | -12.969353 | -3.5270799 | -25.622975 |
| 26.717172 | 1.6527688 | 1.2929993  | -24.370175 | -8.9544865 | -13.413209 | -3.5560437 | -25.859871 |
| 26.969697 | 1.6698287 | 1.327462   | -24.630217 | -8.7276699 | -13.88547  | -3.5803404 | -26.098862 |
| 27.222222 | 1.6868636 | 1.3599676  | -24.888131 | -8.4759071 | -14.38184  | -3.600529  | -26.339526 |
| 27.474747 | 1.7038685 | 1.3903497  | -25.143722 | -8.19274   | -14.908587 | -3.6154212 | -26.582154 |
| 27.727273 | 1.72085   | 1.4192786  | -25.3977   | -7.8827739 | -15.461266 | -3.6256715 | -26.826333 |
| 27.979798 | 1.7378044 | 1.4467949  | -25.650093 | -7.5424652 | -16.043318 | -3.6305027 | -27.072155 |
| 28.232323 | 1.7547341 | 1.4731891  | -25.901205 | -7.1744438 | -16.652091 | -3.6298188 | -27.319327 |
| 28.484848 | 1.7716413 | 1.4986345  | -26.15122  | -6.7807358 | -17.285634 | -3.6237547 | -27.567682 |
| 28.737374 | 1.7885244 | 1.5232586  | -26.400269 | -6.3636772 | -17.941569 | -3.6119235 | -27.817012 |
| 28.989899 | 1.805386  | 1.547198   | -26.648498 | -5.9275567 | -18.615623 | -3.5945178 | -28.067086 |
| 29.242424 | 1.822227  | 1.5705785  | -26.896044 | -5.4775713 | -19.302665 | -3.5715933 | -28.317652 |
| 29.494949 | 1.8390482 | 1.5934743  | -27.142987 | -5.0184087 | -19.998017 | -3.5431434 | -28.568515 |
| 29.747475 | 1.8558488 | 1.6159039  | -27.389341 | -4.5552406 | -20.696427 | -3.5084789 | -28.81947  |
| 30        | 1.872617  | 1.6377266  | -27.634895 | -4.1027617 | -21.382664 | -3.4635036 | -29.069992 |

**S. Table 8.** Permanent electric dipole moments data of  $(1-5)^3\Sigma^+$  electronic states of the  $\text{BeCs}^+$  molecular ion.

| $R(\text{Bohr})$ | $1^3\Sigma^+$ | $2^3\Sigma^+$ | $3^3\Sigma^+$ | $4^3\Sigma^+$ | $5^3\Sigma^+$ |
|------------------|---------------|---------------|---------------|---------------|---------------|
| 5                | 0.021526      | -4.104878     | -6.735462     | 1.421406      | -0.468714     |
| 5.2525253        | 0.030498879   | -4.3141942    | -6.7199727    | 1.0315517     | -0.26893791   |
| 5.5050505        | 0.027627848   | -4.5242968    | -6.6047099    | 0.55610929    | -0.20390731   |
| 5.7575758        | 0.016642545   | -4.7319519    | -6.4037614    | -0.0014241818 | -0.22010403   |
| 6.010101         | 0.001231899   | -4.9337924    | -6.1413462    | -0.62618151   | -0.28724837   |
| 6.2626263        | -0.016335     | -5.1255469    | -5.8290443    | -1.3139373    | -0.41824262   |
| 6.5151515        | -0.034056333  | -5.3036078    | -5.4792154    | -2.0570673    | -0.66577403   |
| 6.7676768        | -0.050396677  | -5.4636547    | -5.1013499    | -2.8514114    | -1.1892099    |
| 7.020202         | -0.064186848  | -5.6032604    | -4.7119899    | -3.6834568    | -2.3418328    |
| 7.2727273        | -0.074475182  | -5.7209678    | -4.3346423    | -4.5298281    | -4.0445783    |
| 7.5252525        | -0.080402438  | -5.8169472    | -4.0070266    | -5.3447606    | -4.5392713    |
| 7.7777778        | -0.081742778  | -5.8953194    | -3.7692802    | -6.0688374    | -4.3980282    |
| 8.030303         | -0.077972212  | -5.9602525    | -3.669368     | -6.6270957    | -4.2883371    |
| 8.2828283        | -0.069095485  | -6.0180657    | -3.7250328    | -6.9777074    | -4.29798      |
| 8.5353535        | -0.055065778  | -6.0750836    | -3.9237357    | -7.1170418    | -4.423006     |

|           |              |            |            |            |            |
|-----------|--------------|------------|------------|------------|------------|
| 8.7878788 | -0.036235818 | -6.1368774 | -4.2199188 | -7.0894518 | -4.6436087 |
| 9.040404  | -0.012827111 | -6.2082685 | -4.5676645 | -6.9421269 | -4.9456356 |
| 9.2929293 | 0.014524232  | -6.2918959 | -4.9280636 | -6.7220566 | -5.3122187 |
| 9.5454545 | 0.045499841  | -6.390679  | -5.2766889 | -6.4531466 | -5.738481  |
| 9.7979798 | 0.079245692  | -6.5043924 | -5.6021203 | -6.1526168 | -6.2153464 |
| 10.050505 | 0.11511357   | -6.6326172 | -5.900303  | -5.8268804 | -6.7386794 |
| 10.30303  | 0.15264365   | -6.7759308 | -6.1679037 | -5.4768638 | -7.3092118 |
| 10.555556 | 0.19122086   | -6.9337615 | -6.4051377 | -5.1055511 | -7.9229692 |
| 10.808081 | 0.23025521   | -7.1042574 | -6.6156595 | -4.7206844 | -8.5690861 |
| 11.060606 | 0.26931212   | -7.286426  | -6.8015682 | -4.332985  | -9.2351536 |
| 11.313131 | 0.30802413   | -7.4797341 | -6.9640847 | -3.9575431 | -9.9052331 |
| 11.565657 | 0.34609102   | -7.6833453 | -7.1051146 | -3.6121525 | -10.560375 |
| 11.818182 | 0.38326615   | -7.8968824 | -7.2256493 | -3.315332  | -11.181662 |
| 12.070707 | 0.41945799   | -8.1193152 | -7.3280576 | -3.0759536 | -11.758843 |
| 12.323232 | 0.45453338   | -8.3506525 | -7.4126328 | -2.9025878 | -12.283507 |
| 12.575758 | 0.48845277   | -8.5905674 | -7.4803738 | -2.7949813 | -12.755516 |
| 12.828283 | 0.52127059   | -8.8383961 | -7.5329206 | -2.7456516 | -13.181405 |
| 13.080808 | 0.55290026   | -9.0946614 | -7.5696206 | -2.7528666 | -13.563865 |
| 13.333333 | 0.5834245    | -9.3589353 | -7.5916195 | -2.806674  | -13.912241 |
| 13.585859 | 0.61292199   | -9.6307574 | -7.5999867 | -2.8983808 | -14.234684 |
| 13.838384 | 0.64146309   | -9.9098072 | -7.595462  | -3.0212503 | -14.537558 |
| 14.090909 | 0.6687296    | -10.198776 | -7.5732882 | -3.1790584 | -14.821978 |
| 14.343434 | 0.69509515   | -10.494887 | -7.538347  | -3.3593178 | -15.09602  |
| 14.59596  | 0.7214607    | -10.790998 | -7.5034059 | -3.5395772 | -15.370063 |
| 14.848485 | 0.74702884   | -11.093428 | -7.456837  | -3.7372695 | -15.637913 |
| 15.10101  | 0.77118048   | -11.406094 | -7.3892549 | -3.963032  | -15.897553 |
| 15.353535 | 0.7944067    | -11.724682 | -7.3078545 | -4.2056369 | -16.153131 |
| 15.606061 | 0.81763291   | -12.04327  | -7.2264542 | -4.4482418 | -16.408709 |
| 15.858586 | 0.84085912   | -12.361858 | -7.1450538 | -4.6908467 | -16.664286 |
| 16.111111 | 0.86408533   | -12.680446 | -7.0636535 | -4.9334516 | -16.919864 |
| 16.363636 | 0.88674972   | -13.001297 | -6.9739686 | -5.1860552 | -17.172169 |
| 16.616162 | 0.90849032   | -13.324934 | -6.8708474 | -5.4552037 | -17.417966 |
| 16.868687 | 0.92992721   | -13.648147 | -6.763307  | -5.7304071 | -17.65946  |
| 17.121212 | 0.95074888   | -13.967647 | -6.646804  | -6.0196178 | -17.884287 |
| 17.373737 | 0.97116946   | -14.283832 | -6.5241498 | -6.3189362 | -18.095145 |
| 17.626263 | 0.99159003   | -14.600018 | -6.4014956 | -6.6182545 | -18.306004 |
| 17.878788 | 1.0120106    | -14.916203 | -6.2788414 | -6.9175729 | -18.516862 |
| 18.131313 | 1.0324312    | -15.232388 | -6.1561872 | -7.2168912 | -18.727721 |
| 18.383838 | 1.0527111    | -15.546683 | -6.0309694 | -7.5207203 | -18.929448 |
| 18.636364 | 1.0724045    | -15.852709 | -5.8946282 | -7.8441347 | -19.089095 |
| 18.888889 | 1.0919517    | -16.155904 | -5.7545971 | -8.1740427 | -19.229353 |
| 19.141414 | 1.0997644    | -16.452697 | -5.6269736 | -8.5077276 | -19.346544 |
| 19.393939 | 0.95673687   | -16.710573 | -5.7216361 | -8.7855072 | -19.52011  |
| 19.646465 | 1.1496005    | -17.044056 | -5.3038769 | -9.2162048 | -19.446978 |
| 19.89899  | 1.1685541    | -17.333834 | -5.14365   | -9.5802507 | -19.436866 |
| 20.151515 | 1.1873643    | -17.620235 | -4.977458  | -9.9541021 | -19.365313 |

|           |           |            |              |            |            |
|-----------|-----------|------------|--------------|------------|------------|
| 20.40404  | 1.2060617 | -17.90369  | -4.8057951   | -10.336942 | -19.228989 |
| 20.656566 | 1.2246601 | -18.184631 | -4.6293237   | -10.727745 | -19.029144 |
| 20.909091 | 1.243151  | -18.462803 | -4.4474927   | -11.127587 | -18.750185 |
| 21.161616 | 1.2615411 | -18.738512 | -4.2609999   | -11.535595 | -18.394605 |
| 21.414141 | 1.2798407 | -19.011726 | -4.0700633   | -11.951872 | -17.960626 |
| 21.666667 | 1.2980433 | -19.282619 | -3.875429    | -12.375631 | -17.456863 |
| 21.919192 | 1.316181  | -19.551933 | -3.6791914   | -12.80389  | -16.920477 |
| 22.171717 | 1.3342185 | -19.818806 | -3.4804754   | -13.239107 | -16.333661 |
| 22.424242 | 1.352256  | -20.085678 | -3.2817594   | -13.674324 | -15.746845 |
| 22.676768 | 1.3701307 | -20.348782 | -3.0840084   | -14.116576 | -15.1584   |
| 22.929293 | 1.3879947 | -20.611635 | -2.8863216   | -14.559296 | -14.569847 |
| 23.181818 | 1.4058203 | -20.87363  | -2.6903034   | -15.002403 | -13.998033 |
| 23.434343 | 1.4235649 | -21.133813 | -2.4978448   | -15.446299 | -13.461839 |
| 23.686869 | 1.4412395 | -21.392582 | -2.310463    | -15.888776 | -12.970132 |
| 23.939394 | 1.4588655 | -21.650304 | -2.1280115   | -16.329125 | -12.516363 |
| 24.191919 | 1.4764318 | -21.906845 | -1.9524902   | -16.765771 | -12.108853 |
| 24.444444 | 1.4939613 | -22.162698 | -1.7816936   | -17.199588 | -11.729236 |
| 24.69697  | 1.5114426 | -22.417615 | -1.6179789   | -17.628865 | -11.387887 |
| 24.949495 | 1.5288818 | -22.671694 | -1.4614685   | -18.053182 | -11.08098  |
| 25.20202  | 1.5462656 | -22.924909 | -1.3132066   | -18.471443 | -10.809164 |
| 25.454545 | 1.5636171 | -23.177473 | -1.1716503   | -18.884535 | -10.56343  |
| 25.707071 | 1.5809283 | -23.429377 | -1.0372493   | -19.291884 | -10.343692 |
| 25.959596 | 1.5982067 | -23.680659 | -0.90990322  | -19.693335 | -10.148149 |
| 26.212121 | 1.6154383 | -23.931272 | -0.79046323  | -20.087833 | -9.9785341 |
| 26.464646 | 1.6326435 | -24.181433 | -0.67646008  | -20.477375 | -9.8264532 |
| 26.717172 | 1.6498139 | -24.431033 | -0.56927148  | -20.860433 | -9.696283  |
| 26.969697 | 1.6669506 | -24.680106 | -0.46852756  | -21.237038 | -9.5873245 |
| 27.222222 | 1.6840605 | -24.928771 | -0.37277377  | -21.608406 | -9.4954536 |
| 27.474747 | 1.701136  | -25.176961 | -0.28273916  | -21.973495 | -9.424214  |
| 27.727273 | 1.7181866 | -25.424772 | -0.19720794  | -22.333376 | -9.370849  |
| 27.979798 | 1.7352087 | -25.672172 | -0.11647625  | -22.687424 | -9.3382965 |
| 28.232323 | 1.7522049 | -25.919199 | -0.039950014 | -23.036069 | -9.3264157 |
| 28.484848 | 1.7691755 | -26.165876 | 0.032716515  | -23.379493 | -9.336226  |
| 28.737374 | 1.7861215 | -26.412211 | 0.10174229   | -23.71771  | -9.3700163 |
| 28.989899 | 1.8030446 | -26.658228 | 0.16749586   | -24.051    | -9.4292125 |
| 29.242424 | 1.8199455 | -26.903954 | 0.23038545   | -24.379757 | -9.5148271 |
| 29.494949 | 1.836825  | -27.149403 | 0.29063424   | -24.704137 | -9.6293868 |
| 29.747475 | 1.8536833 | -27.394558 | 0.34818555   | -25.023822 | -9.7799936 |
| 30        | 1.8705064 | -27.639263 | 0.40190486   | -25.336343 | -10.00282  |

**S. Table 9.** Permanent electric dipole moments data of (1-5)  $^1\Pi$  electronic states of the  $\text{BeCs}^+$  molecular ion.

| $R(\text{Bohr})$ | $1^1\Pi$     | $2^1\Pi$    | $3^1\Pi$   | $4^1\Pi$   | $5^1\Pi$     |
|------------------|--------------|-------------|------------|------------|--------------|
| 5                | -0.873706    | -0.786032   | -5.202501  | -3.058997  | -0.527494    |
| 5.2525253        | -0.88178331  | -0.81883411 | -5.4563898 | -3.0412595 | -0.51808511  |
| 5.5050505        | -0.87985503  | -0.89698306 | -5.6901177 | -3.0498227 | -0.50013551  |
| 5.7575758        | -0.86949367  | -1.0091985  | -5.9043659 | -3.0654003 | -0.47419655  |
| 6.010101         | -0.85291946  | -1.1415581  | -6.102398  | -3.0872111 | -0.44193512  |
| 6.2626263        | -0.83112979  | -1.2856242  | -6.2838694 | -3.122529  | -0.4041989   |
| 6.5151515        | -0.80523667  | -1.434622   | -6.4472424 | -3.1805152 | -0.36228655  |
| 6.7676768        | -0.77569216  | -1.5849984  | -6.5863722 | -3.2735297 | -0.3170938   |
| 7.020202         | -0.74299742  | -1.7349482  | -6.6933173 | -3.4130667 | -0.26968313  |
| 7.2727273        | -0.70740864  | -1.8840543  | -6.7567471 | -3.6120165 | -0.220893    |
| 7.5252525        | -0.66908514  | -2.0327556  | -6.7614564 | -3.8853109 | -0.17151409  |
| 7.7777778        | -0.62838611  | -2.1819936  | -6.6986192 | -4.2385664 | -0.12222322  |
| 8.030303         | -0.5854217   | -2.3330485  | -6.5563281 | -4.6807112 | -0.073579364 |
| 8.2828283        | -0.54046832  | -2.4872337  | -6.3364217 | -5.2057558 | -0.025983949 |
| 8.5353535        | -0.49374423  | -2.6460077  | -6.0503777 | -5.7982899 | 0.020219303  |
| 8.7878788        | -0.44556476  | -2.8104724  | -5.7239507 | -6.4290721 | 0.064878364  |
| 9.040404         | -0.39617567  | -2.9819346  | -5.3863262 | -7.0658431 | 0.10781913   |
| 9.2929293        | -0.34592195  | -3.1608738  | -5.0633476 | -7.6808983 | 0.14908431   |
| 9.5454545        | -0.29506853  | -3.348386   | -4.7739411 | -8.2532864 | 0.18856769   |
| 9.7979798        | -0.24395159  | -3.5440655  | -4.5223151 | -8.778749  | 0.22644536   |
| 10.050505        | -0.1928366   | -3.7475612  | -4.3069575 | -9.2590093 | 0.26284003   |
| 10.30303         | -0.14198296  | -3.9590892  | -4.1265971 | -9.6950649 | 0.29774239   |
| 10.555556        | -0.091665016 | -4.1782253  | -3.976191  | -10.092557 | 0.3312349    |
| 10.808081        | -0.042055764 | -4.4038465  | -3.8488487 | -10.459826 | 0.36350821   |
| 11.060606        | 0.0066770606 | -4.6352585  | -3.7403167 | -10.802117 | 0.39466097   |
| 11.313131        | 0.054365434  | -4.8719697  | -3.6476568 | -11.123144 | 0.42476083   |
| 11.565657        | 0.10089942   | -5.113333   | -3.5679278 | -11.426817 | 0.45390507   |
| 11.818182        | 0.14615551   | -5.3589394  | -3.4990426 | -11.715909 | 0.48215128   |
| 12.070707        | 0.19015376   | -5.6081714  | -3.4386174 | -11.993622 | 0.50962795   |
| 12.323232        | 0.23280643   | -5.8609197  | -3.3854307 | -12.261524 | 0.53637079   |
| 12.575758        | 0.27410771   | -6.1170186  | -3.3380741 | -12.521345 | 0.56244734   |
| 12.828283        | 0.31413423   | -6.3762494  | -3.2950977 | -12.77481  | 0.58793902   |
| 13.080808        | 0.3527869    | -6.6389487  | -3.2557342 | -13.022545 | 0.61284844   |
| 13.333333        | 0.39013583   | -6.9051523  | -3.2187452 | -13.26577  | 0.6372365    |
| 13.585859        | 0.4262595    | -7.1749159  | -3.1830864 | -13.505435 | 0.66116176   |
| 13.838384        | 0.46121575   | -7.4483977  | -3.1478611 | -13.742257 | 0.68465452   |
| 14.090909        | 0.49456354   | -7.7278449  | -3.1114456 | -13.976122 | 0.70758968   |
| 14.343434        | 0.52674559   | -8.0120195  | -3.0733834 | -14.208221 | 0.7301249    |
| 14.59596         | 0.55892764   | -8.2961942  | -3.0353212 | -14.44032  | 0.75266011   |
| 14.848485        | 0.59003801   | -8.5853746  | -2.9945433 | -14.671305 | 0.77483104   |

|           |            |            |              |            |            |
|-----------|------------|------------|--------------|------------|------------|
| 15.10101  | 0.61916559 | -8.8854749 | -2.9458324   | -14.901305 | 0.7963543  |
| 15.353535 | 0.64695705 | -9.1938846 | -2.8901034   | -15.131259 | 0.81743506 |
| 15.606061 | 0.67474852 | -9.5022943 | -2.8343743   | -15.361212 | 0.83851582 |
| 15.858586 | 0.70253998 | -9.810704  | -2.7786453   | -15.591166 | 0.85959658 |
| 16.111111 | 0.73033144 | -10.119114 | -2.7229163   | -15.82112  | 0.88067733 |
| 16.363636 | 0.75727343 | -10.433561 | -2.6612577   | -16.051617 | 0.90147589 |
| 16.616162 | 0.78281391 | -10.758223 | -2.5891991   | -16.28331  | 0.92180528 |
| 16.868687 | 0.807862   | -11.086748 | -2.5126743   | -16.515862 | 0.94196502 |
| 17.121212 | 0.83194632 | -11.422368 | -2.4267959   | -16.751034 | 0.96177495 |
| 17.373737 | 0.85538239 | -11.762549 | -2.334529    | -16.988243 | 0.98134777 |
| 17.626263 | 0.87881846 | -12.10273  | -2.2422622   | -17.225451 | 1.0009206  |
| 17.878788 | 0.90225453 | -12.442911 | -2.1499953   | -17.46266  | 1.0204934  |
| 18.131313 | 0.92569061 | -12.783092 | -2.0577285   | -17.699868 | 1.0400662  |
| 18.383838 | 0.94889922 | -13.124451 | -1.9633277   | -17.938077 | 1.0595517  |
| 18.636364 | 0.97115677 | -13.470364 | -1.8601993   | -18.180641 | 1.0786663  |
| 18.888889 | 0.99317675 | -13.816586 | -1.7553267   | -18.424657 | 1.0976803  |
| 19.141414 | 1.0032474  | -14.15771  | -1.6642516   | -18.670085 | 1.1050434  |
| 19.393939 | 0.86103802 | -14.433802 | -1.7748512   | -18.910821 | 0.96186252 |
| 19.646465 | 1.057621   | -14.851921 | -1.432642    | -19.167893 | 1.1540428  |
| 19.89899  | 1.078671   | -15.194403 | -1.3242103   | -19.418945 | 1.1726429  |
| 20.151515 | 1.0994986  | -15.534556 | -1.2161303   | -19.671759 | 1.1911348  |
| 20.40404  | 1.1201379  | -15.872164 | -1.1088266   | -19.926065 | 1.209544   |
| 20.656566 | 1.140617   | -16.207228 | -1.002535    | -20.181592 | 1.2278775  |
| 20.909091 | 1.1609184  | -16.539041 | -0.89779156  | -20.438364 | 1.2461491  |
| 21.161616 | 1.181066   | -16.867531 | -0.79486198  | -20.696109 | 1.2643095  |
| 21.414141 | 1.2010493  | -17.192216 | -0.6942279   | -20.954651 | 1.2824039  |
| 21.666667 | 1.2208823  | -17.513021 | -0.596117    | -21.213747 | 1.300421   |
| 21.919192 | 1.2406082  | -17.830788 | -0.50020981  | -21.472915 | 1.3183867  |
| 22.171717 | 1.2601686  | -18.143859 | -0.40770919  | -21.732193 | 1.336273   |
| 22.424242 | 1.2797289  | -18.456929 | -0.31520856  | -21.991471 | 1.3541594  |
| 22.676768 | 1.2990214  | -18.761644 | -0.22953524  | -22.24965  | 1.3718985  |
| 22.929293 | 1.318296   | -19.065803 | -0.1443163   | -22.507756 | 1.3896277  |
| 23.181818 | 1.337506   | -19.367866 | -0.060989595 | -22.765278 | 1.4073256  |
| 23.434343 | 1.3565791  | -19.665499 | 0.018333192  | -23.021557 | 1.4249572  |
| 23.686869 | 1.3755406  | -19.959477 | 0.094101141  | -23.276378 | 1.4425311  |
| 23.939394 | 1.394416   | -20.250684 | 0.16705204   | -23.529885 | 1.4600617  |
| 24.191919 | 1.4131898  | -20.538702 | 0.23661907   | -23.781634 | 1.477541   |
| 24.444444 | 1.4319057  | -20.824846 | 0.30411956   | -24.032225 | 1.4949905  |
| 24.69697  | 1.4505387  | -21.108422 | 0.36871601   | -24.281112 | 1.5123955  |
| 24.949495 | 1.4690956  | -21.389687 | 0.43059858   | -24.528306 | 1.529771   |
| 25.20202  | 1.4875691  | -21.668569 | 0.48957632   | -24.773594 | 1.5470803  |
| 25.454545 | 1.50598    | -21.945661 | 0.546302     | -25.01735  | 1.5643665  |
| 25.707071 | 1.5243265  | -22.220953 | 0.60070889   | -25.259485 | 1.5816233  |
| 25.959596 | 1.5426082  | -22.49456  | 0.65289118   | -25.500033 | 1.5988391  |
| 26.212121 | 1.5608183  | -22.766372 | 0.70263943   | -25.73881  | 1.6160259  |
| 26.464646 | 1.578982   | -23.036987 | 0.75073171   | -25.976375 | 1.6331831  |

|           |           |            |            |            |           |
|-----------|-----------|------------|------------|------------|-----------|
| 26.717172 | 1.5970837 | -23.306141 | 0.79677299 | -26.21243  | 1.6503175 |
| 26.969697 | 1.6151263 | -23.573943 | 0.84088548 | -26.447065 | 1.6674094 |
| 27.222222 | 1.6331216 | -23.84071  | 0.8835113  | -26.680609 | 1.6844995 |
| 27.474747 | 1.6510604 | -24.1063   | 0.92442752 | -26.912915 | 1.7015163 |
| 27.727273 | 1.6689553 | -24.370963 | 0.96398905 | -27.144254 | 1.7185258 |
| 27.979798 | 1.6868004 | -24.634633 | 1.0021067  | -27.37458  | 1.7355121 |
| 28.232323 | 1.7045989 | -24.897426 | 1.0389522  | -27.604035 | 1.7524821 |
| 28.484848 | 1.7223508 | -25.159402 | 1.0746114  | -27.832707 | 1.7694206 |
| 28.737374 | 1.7400615 | -25.420593 | 1.1091501  | -28.060663 | 1.7863423 |
| 28.989899 | 1.7577301 | -25.681063 | 1.1426681  | -28.287996 | 1.8032408 |
| 29.242424 | 1.7753605 | -25.940887 | 1.175287   | -28.514804 | 1.8201149 |
| 29.494949 | 1.7929538 | -26.200099 | 1.207068   | -28.741152 | 1.8369734 |
| 29.747475 | 1.8105074 | -26.458665 | 1.2379869  | -28.967053 | 1.8538114 |
| 30        | 1.8279989 | -26.716265 | 1.267664   | -29.192393 | 1.8706177 |

**S. Table10.** Permanent electric dipole moments data of (1-2)  $^3\Pi$  electronic states of the  $\text{BeCs}^+$  molecular ion.

| <b>R(Bohr)</b> | $1^3\Pi$    | $2^3\Pi$     |
|----------------|-------------|--------------|
| 5              | -0.409897   | -5.32116     |
| 5.2525253      | -0.33325923 | -5.5512843   |
| 5.5050505      | -0.28394929 | -2.5837197   |
| 5.7575758      | -0.26558539 | -2.7467505   |
| 6.010101       | -0.29216752 | -2.8702999   |
| 6.2626263      | -2.8631707  | -0.45392232  |
| 6.5151515      | -2.2290418  | -1.2465568   |
| 6.7676768      | -3.0831741  | -0.55450117  |
| 7.020202       | -3.6100778  | -0.19252064  |
| 7.2727273      | -3.8256306  | -0.14391345  |
| 7.5252525      | -3.9969711  | -0.14048137  |
| 7.7777778      | -4.1586712  | -0.146521    |
| 8.030303       | -4.3177327  | -0.15386864  |
| 8.2828283      | -4.4765381  | -0.15917364  |
| 8.5353535      | -4.6360161  | -0.16058858  |
| 8.7878788      | -4.7965488  | -0.15724664  |
| 9.040404       | -4.9584125  | -0.1483794   |
| 9.2929293      | -5.1216943  | -0.13401736  |
| 9.5454545      | -5.2866383  | -0.11381041  |
| 9.7979798      | -5.4532552  | -0.088447856 |
| 10.050505      | -5.6216134  | -0.05851804  |
| 10.30303       | -5.7919795  | -11.85477    |
| 10.555556      | -5.9645756  | -12.113834   |
| 10.808081      | -6.1394467  | -12.365746   |
| 11.060606      | -6.3167746  | -12.609906   |

|           |            |            |
|-----------|------------|------------|
| 11.313131 | -6.4968548 | -12.844847 |
| 11.565657 | -6.6799233 | -13.066926 |
| 11.818182 | -6.8663523 | -13.221758 |
| 12.070707 | -7.0562232 | -13.172509 |
| 12.323232 | -7.2499826 | -13.631457 |
| 12.575758 | -7.4479255 | -13.873348 |
| 12.828283 | -7.6501075 | -14.058777 |
| 13.080808 | -7.8572212 | -14.222964 |
| 13.333333 | -8.0694418 | -14.370269 |
| 13.585859 | -8.2868634 | -14.501132 |
| 13.838384 | -8.5096571 | -14.615056 |
| 14.090909 | -8.7407893 | -14.702328 |
| 14.343434 | -8.9783957 | -14.768751 |
| 14.59596  | -9.2160022 | -14.835175 |
| 14.848485 | -9.4602148 | -14.880267 |
| 15.10101  | -9.7182469 | -14.882544 |
| 15.353535 | -9.9864966 | -14.854414 |
| 15.606061 | -10.254746 | -14.826284 |
| 15.858586 | -10.522996 | -14.798154 |
| 16.111111 | -10.791246 | -14.770024 |
| 16.363636 | -11.066725 | -14.723302 |
| 16.616162 | -11.354402 | -14.647416 |
| 16.868687 | -11.646691 | -14.564017 |
| 17.121212 | -11.947914 | -14.476186 |
| 17.373737 | -12.255062 | -14.388585 |
| 17.626263 | -12.56221  | -14.300984 |
| 17.878788 | -12.869358 | -14.213384 |
| 18.131313 | -13.176506 | -14.125783 |
| 18.383838 | -13.485491 | -14.042117 |
| 18.636364 | -13.80192  | -13.977501 |
| 18.888889 | -14.119689 | -13.923316 |
| 19.141414 | -14.434935 | -13.89658  |
| 19.393939 | -14.701805 | -14.040616 |
| 19.646465 | -15.078219 | -13.861451 |
| 19.89899  | -15.397879 | -13.877417 |
| 20.151515 | -15.716868 | -13.917553 |
| 20.40404  | -16.034847 | -13.981811 |
| 20.656566 | -16.351651 | -14.068924 |
| 20.909091 | -16.666788 | -14.184407 |
| 21.161616 | -16.980076 | -14.32856  |
| 21.414141 | -17.291085 | -14.505799 |
| 21.666667 | -17.599684 | -14.717182 |
| 21.919192 | -17.906262 | -14.956575 |
| 22.171717 | -18.209717 | -15.239264 |
| 22.424242 | -18.513171 | -15.521954 |
| 22.676768 | -18.810695 | -15.887069 |

|           |            |            |
|-----------|------------|------------|
| 22.929293 | -19.107824 | -16.25767  |
| 23.181818 | -19.403389 | -16.649838 |
| 23.434343 | -19.695646 | -17.087596 |
| 23.686869 | -19.985082 | -17.562674 |
| 23.939394 | -20.272336 | -18.06489  |
| 24.191919 | -20.557034 | -18.595556 |
| 24.444444 | -20.840206 | -19.140769 |
| 24.69697  | -21.121265 | -19.703141 |
| 24.949495 | -21.400391 | -20.276159 |
| 25.20202  | -21.677497 | -20.853783 |
| 25.454545 | -21.953064 | -21.429757 |
| 25.707071 | -22.227065 | -21.999198 |
| 25.959596 | -22.499587 | -22.557373 |
| 26.212121 | -22.770512 | -23.097411 |
| 26.464646 | -23.040364 | -23.622062 |
| 26.717172 | -23.308891 | -24.124281 |
| 26.969697 | -23.57618  | -24.602251 |
| 27.222222 | -23.842516 | -25.059982 |
| 27.474747 | -24.107757 | -25.493077 |
| 27.727273 | -24.372127 | -25.905989 |
| 27.979798 | -24.635565 | -26.296935 |
| 28.232323 | -24.898165 | -26.66845  |
| 28.484848 | -25.159985 | -27.022195 |
| 28.737374 | -25.421052 | -27.359407 |
| 28.989899 | -25.681422 | -27.682077 |
| 29.242424 | -25.941166 | -27.992368 |
| 29.494949 | -26.200312 | -28.29161  |
| 29.747475 | -26.45883  | -28.58001  |
| 30        | -26.716396 | -28.854134 |

**S. Table. 11.** Permanent electric dipole moments data of (1-2)  $1,3\Delta$  electronic states of the  $\text{BeCs}^+$  molecular ion.

| $R(\text{Bohr})$ | $1^1\Delta$ | $2^1\Delta$ | $1^3\Delta$ |
|------------------|-------------|-------------|-------------|
| 5                | -1.239037   | -3.801576   | -4.005049   |
| 5.2525253        | -1.3001242  | -3.9423704  | -4.2400871  |
| 5.5050505        | -1.3630846  | -4.0780335  | -4.4704746  |
| 5.7575758        | -1.4220167  | -4.2139999  | -4.697504   |
| 6.010101         | -1.4733922  | -4.3541485  | -4.923091   |
| 6.2626263        | -1.5149642  | -4.5011134  | -5.1482107  |
| 6.5151515        | -1.5466192  | -4.655786   | -5.3739613  |
| 6.7676768        | -1.5684729  | -4.8188057  | -5.6010223  |

|           |             |            |            |
|-----------|-------------|------------|------------|
| 7.020202  | -1.5817959  | -4.9901615 | -5.8299577 |
| 7.2727273 | -1.5873355  | -5.1690613 | -6.061165  |
| 7.5252525 | -1.5861601  | -5.3560449 | -6.2951372 |
| 7.7777778 | -1.5792054  | -5.5498872 | -6.5310914 |
| 8.030303  | -1.5670959  | -5.7511556 | -6.7700053 |
| 8.2828283 | -1.5501069  | -5.9599429 | -7.0115797 |
| 8.5353535 | -1.5282413  | -6.1750273 | -7.2555834 |
| 8.7878788 | -1.5020254  | -6.3976358 | -7.5021999 |
| 9.040404  | -1.4709083  | -6.6275835 | -7.7514474 |
| 9.2929293 | -1.4351228  | -6.864213  | -8.0026594 |
| 9.5454545 | -1.3941415  | -7.1083715 | -8.25617   |
| 9.7979798 | -1.3485274  | -7.3599223 | -8.5116263 |
| 10.050505 | -1.2978597  | -7.6176943 | -8.768532  |
| 10.30303  | -1.2421995  | -7.8827988 | -9.0268966 |
| 10.555556 | -1.1815502  | -8.1546034 | -9.2867404 |
| 10.808081 | -1.1160707  | -8.4317592 | -9.5474744 |
| 11.060606 | -1.0465536  | -8.7149789 | -9.8090205 |
| 11.313131 | -0.97272378 | -9.0034248 | -10.071041 |
| 11.565657 | -0.89865161 | -9.2964384 | -10.333431 |
| 11.818182 | -0.81426563 | -9.5940734 | -10.596253 |
| 12.070707 | -0.73138037 | -9.8941354 | -10.858431 |
| 12.323232 | -0.64608458 | -10.197317 | -11.120392 |
| 12.575758 | -0.559342   | -10.502313 | -11.382131 |
| 12.828283 | -0.47258728 | -10.808573 | -11.643126 |
| 13.080808 | -0.38444021 | -11.115438 | -11.903539 |
| 13.333333 | -0.29832129 | -11.421913 | -12.163058 |
| 13.585859 | -0.21142835 | -11.727731 | -12.421735 |
| 13.838384 | -0.12604371 | -12.032567 | -12.679433 |
| 14.090909 | -0.04388051 | -12.334485 | -12.935501 |
| 14.343434 | 0.03553474  | -12.633936 | -13.190611 |
| 14.59596  | 0.11494999  | -12.933387 | -13.445721 |
| 14.848485 | 0.19139167  | -13.230132 | -13.699649 |
| 15.10101  | 0.26125026  | -13.519727 | -13.951288 |
| 15.353535 | 0.32566092  | -13.804035 | -14.201231 |
| 15.606061 | 0.39007158  | -14.088344 | -14.451175 |
| 15.858586 | 0.45448223  | -14.372653 | -14.701119 |
| 16.111111 | 0.51889289  | -14.656962 | -14.951063 |
| 16.363636 | 0.57952155  | -14.937274 | -15.199928 |
| 16.616162 | 0.63362939  | -15.210704 | -15.446812 |
| 16.868687 | 0.68348069  | -15.481212 | -15.692868 |
| 17.121212 | 0.72958102  | -15.746264 | -15.937563 |
| 17.373737 | 0.77125815  | -16.007404 | -16.181184 |
| 17.626263 | 0.81293528  | -16.268545 | -16.424805 |
| 17.878788 | 0.85461241  | -16.529685 | -16.668426 |
| 18.131313 | 0.89628954  | -16.790825 | -16.912047 |
| 18.383838 | 0.93432723  | -17.050472 | -17.155327 |

|           |            |            |            |
|-----------|------------|------------|------------|
| 18.636364 | 0.96562018 | -17.304216 | -17.397059 |
| 18.888889 | 1.0025432  | -17.556565 | -17.638319 |
| 19.141414 | 1.0323229  | -17.805693 | -17.878706 |
| 19.393939 | 1.0617885  | -18.054454 | -18.118946 |
| 19.646465 | 1.0912542  | -18.303214 | -18.359186 |
| 19.89899  | 1.1196524  | -18.550633 | -18.599426 |
| 20.151515 | 1.1458226  | -18.796089 | -18.83889  |
| 20.40404  | 1.1705594  | -19.040559 | -19.078006 |
| 20.656566 | 1.1948676  | -19.284297 | -19.316952 |
| 20.909091 | 1.2189552  | -19.527074 | -19.55564  |
| 21.161616 | 1.2396857  | -19.767158 | -19.793799 |
| 21.414141 | 1.2597956  | -20.006768 | -20.032236 |
| 21.666667 | 1.2799056  | -20.246377 | -20.27027  |
| 21.919192 | 1.3000155  | -20.485987 | -20.508203 |
| 22.171717 | 1.3201254  | -20.725597 | -20.745981 |
| 22.424242 | 1.3402354  | -20.965207 | -20.983759 |
| 22.676768 | 1.3603453  | -21.204816 | -21.221173 |
| 22.929293 | 1.3804552  | -21.444426 | -21.458562 |
| 23.181818 | 1.4005651  | -21.684036 | -21.695903 |
| 23.434343 | 1.4206751  | -21.923645 | -21.933138 |
| 23.686869 | 1.440785   | -22.163255 | -22.170286 |
| 23.939394 | 1.4552713  | -22.402198 | -22.407355 |
| 24.191919 | 1.4769245  | -22.639902 | -22.64435  |
| 24.444444 | 1.4999715  | -22.877514 | -22.881334 |
| 24.69697  | 1.5167407  | -23.114954 | -23.118271 |
| 24.949495 | 1.5341841  | -23.352272 | -23.355167 |
| 25.20202  | 1.5507696  | -23.589486 | -23.591907 |
| 25.454545 | 1.5690949  | -23.8266   | -23.828682 |
| 25.707071 | 1.5776386  | -24.063637 | -24.065434 |
| 25.959596 | 1.6042908  | -24.300607 | -24.302143 |
| 26.212121 | 1.6185741  | -24.537505 | -24.538822 |
| 26.464646 | 1.6301068  | -24.774374 | -24.775484 |
| 26.717172 | 1.655289   | -25.010925 | -25.012101 |
| 26.969697 | 1.6664121  | -25.247916 | -25.248726 |
| 27.222222 | 1.690323   | -25.484637 | -25.485263 |
| 27.474747 | 1.706868   | -25.721323 | -25.721799 |
| 27.727273 | 1.7235114  | -25.95801  | -25.958336 |
| 27.979798 | 1.7415096  | -26.194614 | -26.194872 |
| 28.232323 | 1.7573319  | -26.431206 | -26.431408 |
| 28.484848 | 1.7730589  | -26.667798 | -26.667945 |
| 28.737374 | 1.7922027  | -26.904364 | -26.904481 |
| 28.989899 | 1.8089196  | -27.140911 | -27.141018 |
| 29.242424 | 1.8259037  | -27.37743  | -27.377554 |
| 29.494949 | 1.8429613  | -27.613966 | -27.61409  |
| 29.747475 | 1.850647   | -27.850474 | -27.850618 |
| 30        | 1.86894    | -28.086966 | -28.087091 |

**S. Table 12.** Transition electric dipole moments between low-lying  $1,3\Sigma^+$  electronic states of the  $\text{BeCs}^+$  molecular ion.

| $R(\text{Bohr})$ | $2^1\Sigma^+ - 1^1\Sigma^+$ | $R(\text{Bohr})$ | $3^1\Sigma^+ - 1^1\Sigma^+$ | $R(\text{Bohr})$ | $4^1\Sigma^+ - 1^1\Sigma^+$ | $R(\text{Bohr})$ | $5^1\Sigma^+ - 1^1\Sigma^+$ |
|------------------|-----------------------------|------------------|-----------------------------|------------------|-----------------------------|------------------|-----------------------------|
| 4.5              | 1.867665                    | 4.5              | 0.189702                    | 4.5              | 0.198056                    | 4.5              | 0.050878                    |
| 4.6              | 1.852071                    | 4.6              | 0.227301                    | 4.6              | 0.190988                    | 4.6              | 0.051612                    |
| 4.7              | 1.839879                    | 4.7              | 0.245557                    | 4.7              | 0.179982                    | 4.7              | 0.051315                    |
| 4.8              | 1.830605                    | 4.8              | 0.254219                    | 4.8              | 0.166443                    | 4.8              | 0.050239                    |
| 4.9              | 1.823847                    | 4.9              | 0.257429                    | 4.9              | 0.151502                    | 4.9              | 0.0486                      |
| 5                | 1.81927                     | 5                | 0.257264                    | 5                | 0.545194                    | 5                | 0.046591                    |
| 5.1              | 1.816585                    | 5.1              | 0.254889                    | 5.1              | 0.54528                     | 5.1              | 0.044383                    |
| 5.2              | 1.81554                     | 5.2              | 0.251011                    | 5.2              | 0.544835                    | 5.2              | 0.042124                    |
| 5.3              | 1.815914                    | 5.3              | 0.246092                    | 5.3              | 0.543766                    | 5.3              | 0.039932                    |
| 5.4              | 1.817512                    | 5.4              | 0.240454                    | 5.4              | 0.542028                    | 5.4              | 0.037898                    |
| 5.5              | 1.820162                    | 5.5              | 0.234343                    | 5.5              | 0.5396                      | 5.5              | 0.036083                    |
| 5.6              | 1.823712                    | 5.6              | 0.227958                    | 5.6              | 0.536475                    | 5.6              | 0.034519                    |
| 5.7              | 1.828029                    | 5.7              | 0.221476                    | 5.7              | 0.532649                    | 5.7              | 0.033211                    |
| 5.8              | 1.83299                     | 5.8              | 0.215064                    | 5.8              | 0.528115                    | 5.8              | 0.032143                    |
| 5.9              | 1.838483                    | 5.9              | 0.208891                    | 5.9              | 0.52287                     | 5.9              | 0.03128                     |
| 6                | 1.844404                    | 6                | 0.203133                    | 6                | 0.516907                    | 6                | 0.030571                    |
| 6.1              | 1.850653                    | 6.1              | 0.197979                    | 6.1              | 0.510221                    | 6.1              | 0.029961                    |
| 6.2              | 1.857135                    | 6.2              | 0.193628                    | 6.2              | 0.502814                    | 6.2              | 0.029391                    |
| 6.3              | 1.863754                    | 6.3              | 0.190296                    | 6.3              | 0.494691                    | 6.3              | 0.028801                    |
| 6.4              | 1.870415                    | 6.4              | 0.188201                    | 6.4              | 0.48587                     | 6.4              | 0.028139                    |
| 6.5              | 1.877023                    | 6.5              | 0.187564                    | 6.5              | 0.476379                    | 6.5              | 0.027356                    |
| 6.6              | 1.883481                    | 6.6              | 0.188592                    | 6.6              | 0.466258                    | 6.6              | 0.026411                    |
| 6.7              | 1.889696                    | 6.7              | 0.191469                    | 6.7              | 0.45556                     | 6.7              | 0.02527                     |
| 6.8              | 1.895572                    | 6.8              | 0.196346                    | 6.8              | 0.444346                    | 7.7              | 0.015026                    |
| 6.9              | 1.901018                    | 6.9              | 0.203328                    | 6.9              | 0.432681                    | 7.8              | 0.019458                    |
| 7                | 1.905946                    | 7                | 0.212469                    | 7                | 0.420636                    | 7.9              | 0.024434                    |
| 7.1              | 1.910274                    | 7.1              | 0.223775                    | 7.1              | 0.408276                    | 8                | 0.029938                    |
| 7.25             | 1.915478                    | 7.25             | 0.244672                    | 7.25             | 0.389277                    | 8.1              | 0.035947                    |
| 7.3              | 1.916836                    | 7.3              | 0.252639                    | 7.3              | 0.382849                    | 8.2              | 0.042432                    |
| 7.45             | 1.91969                     | 7.45             | 0.279297                    | 7.45             | 0.363351                    | 8.3              | 0.049359                    |
| 7.5              | 1.920215                    | 7.5              | 0.289031                    | 7.5              | 0.356796                    | 8.4              | 0.056689                    |
| 7.65             | 1.920462                    | 7.65             | 0.320452                    | 7.65             | 0.337012                    | 8.5              | 0.064376                    |
| 7.7              | 1.920093                    | 7.7              | 0.331581                    | 7.7              | 0.330387                    | 8.6              | 0.072371                    |
| 7.8              | 1.918672                    | 7.8              | 0.354671                    | 7.8              | 0.317104                    | 8.7              | 0.080621                    |
| 7.9              | 1.916341                    | 7.9              | 0.378702                    | 7.9              | 0.303787                    | 8.8              | 0.08907                     |
| 8                | 1.913113                    | 8                | 0.403478                    | 8                | 0.290447                    | 8.9              | 0.097656                    |
| 8.1              | 1.909009                    | 8.1              | 0.428815                    | 8.1              | 0.277093                    | 9                | 0.10632                     |
| 8.2              | 1.90406                     | 8.2              | 0.45454                     | 8.2              | 0.26373                     | 9.1              | 0.114995                    |
| 8.3              | 1.898303                    | 8.3              | 0.480496                    | 8.3              | 0.250363                    | 9.2              | 0.123618                    |
| 8.4              | 1.891781                    | 8.4              | 0.506541                    | 8.4              | 0.236993                    | 9.3              | 0.115809                    |
| 8.5              | 1.884543                    | 8.5              | 0.532549                    | 8.5              | 0.223623                    | 9.43             | 0.097813                    |
| 8.6              | 1.876639                    | 8.6              | 0.558412                    | 8.6              | 0.210251                    | 9.5              | 0.088009                    |

|       |          |       |          |       |           |       |          |
|-------|----------|-------|----------|-------|-----------|-------|----------|
| 8.7   | 1.868123 | 8.7   | 0.584036 | 8.7   | 0.196871  | 9.66  | 0.065237 |
| 8.8   | 1.85905  | 8.8   | 0.609339 | 8.8   | 0.183477  | 9.7   | 0.059455 |
| 8.9   | 1.849474 | 8.9   | 0.634255 | 8.9   | 0.170059  | 9.87  | 0.034433 |
| 9     | 1.839449 | 9     | 0.658729 | 9     | 0.156603  | 9.93  | 0.025419 |
| 9.1   | 1.829029 | 9.1   | 0.682717 | 9.1   | 0.14309   | 10    | 0.014781 |
| 9.2   | 1.818265 | 9.2   | 0.706184 | 9.2   | 0.129501  | 10.1  | 0.000637 |
| 9.3   | 1.807206 | 9.3   | 0.729101 | 9.3   | -0.132119 | 10.25 | 0.024192 |
| 9.43  | 1.792468 | 9.43  | 0.758041 | 9.43  | -0.142874 | 10.3  | 0.032135 |
| 9.5   | 1.784394 | 9.5   | 0.773215 | 9.5   | -0.148476 | 10.43 | 0.0529   |
| 9.66  | 1.765668 | 9.66  | 0.806804 | 9.66  | -0.160614 | 10.52 | 0.06729  |
| 9.7   | 1.760942 | 9.7   | 0.814961 | 9.7   | -0.163476 | 10.66 | 0.089488 |
| 9.87  | 1.740739 | 9.87  | 0.848558 | 9.87  | -0.174689 | 10.7  | 0.095751 |
| 9.93  | 1.733585 | 10.52 | 0.96131  | 10.52 | -0.197495 | 10.85 | 0.194342 |
| 10    | 1.725237 | 10.66 | 0.982461 | 10.66 | -0.197335 | 11    | 0.190057 |
| 10.1  | 1.713328 | 10.7  | 0.988309 | 10.7  | -0.196959 | 11.1  | 0.186454 |
| 10.25 | 1.695557 | 10.85 | 1.009482 | 10.85 | -0.118737 | 11.25 | 0.180216 |
| 10.3  | 1.689672 | 11    | 1.029488 | 11    | 0.140672  | 11.3  | 0.17797  |
| 10.43 | 1.674487 | 11.1  | 1.042194 | 11.1  | 0.154571  | 11.4  | 0.173304 |
| 10.52 | 1.664093 | 11.25 | 1.060334 | 11.25 | 0.174199  | 11.56 | 0.165542 |
| 10.66 | 1.648156 | 11.3  | 1.066141 | 11.3  | 0.180402  | 11.6  | 0.163574 |
| 10.7  | 1.64366  | 11.4  | 1.077402 | 11.4  | 0.192289  | 11.75 | 0.156197 |
| 10.85 | 1.627052 | 11.56 | 1.094466 | 11.56 | 0.209892  | 11.8  | 0.153757 |
| 11    | 1.610876 | 11.6  | 1.098553 | 11.6  | 0.214028  | 11.99 | 0.144674 |
| 11.1  | 1.600353 | 11.75 | 1.113257 | 11.75 | 0.22864   | 12.1  | 0.139599 |
| 11.25 | 1.584987 | 11.8  | 1.117944 | 11.8  | 0.233209  | 12.21 | 0.134684 |
| 11.3  | 1.579981 | 11.99 | 1.134805 | 11.99 | 0.249298  | 12.3  | 0.130788 |
| 11.4  | 1.570149 | 12.1  | 1.143899 | 12.1  | 0.257759  | 12.46 | 0.124153 |
| 11.56 | 1.554935 | 12.21 | 1.152517 | 12.21 | 0.26565   | 12.5  | 0.122553 |
| 11.6  | 1.551232 | 12.3  | 1.159224 | 12.3  | 0.271712  | 12.64 | 0.117135 |
| 11.75 | 1.537721 | 12.46 | 1.1704   | 12.46 | 0.281679  | 12.7  | 0.114899 |
| 11.8  | 1.533349 | 12.5  | 1.173048 | 12.5  | 0.284019  | 12.82 | 0.110576 |
| 11.99 | 1.517351 | 12.64 | 1.181869 | 12.64 | 0.291766  | 12.9  | 0.107801 |
| 12.1  | 1.50854  | 12.7  | 1.185439 | 12.7  | 0.294885  | 13    | 0.10445  |
| 12.21 | 1.500064 | 12.82 | 1.192212 | 12.82 | 0.300782  | 13.1  | 0.101223 |
| 12.3  | 1.49338  | 12.9  | 1.19646  | 12.9  | 0.304475  | 13.26 | 0.096307 |
| 12.46 | 1.482059 | 13    | 1.201476 | 13    | 0.308835  | 13.3  | 0.095122 |
| 12.5  | 1.479341 | 13.1  | 1.206171 | 13.1  | 0.312924  | 13.46 | 0.090554 |
| 12.64 | 1.470187 | 13.26 | 1.213035 | 13.26 | 0.318937  | 13.5  | 0.089453 |
| 12.7  | 1.466433 | 13.3  | 1.214629 | 13.3  | 0.320342  | 13.64 | 0.08572  |
| 12.82 | 1.459232 | 13.46 | 1.220529 | 13.46 | 0.325593  | 13.7  | 0.084175 |
| 12.9  | 1.454657 | 13.5  | 1.221887 | 13.5  | 0.326816  | 13.85 | 0.08045  |
| 13    | 1.449193 | 13.64 | 1.22628  | 13.64 | 0.330825  | 13.92 | 0.078775 |
| 13.1  | 1.444011 | 13.7  | 1.227994 | 13.7  | 0.332418  | 14    | 0.076908 |
| 13.26 | 1.436304 | 13.85 | 1.231848 | 13.85 | 0.336082  | 14.69 | 0.062648 |
| 13.3  | 1.43449  | 13.92 | 1.233439 | 13.92 | 0.337642  | 14.82 | 0.060289 |
| 13.46 | 1.427675 | 14    | 1.235098 | 14    | 0.33931   | 15    | 0.057178 |

|       |          |       |          |       |          |       |          |
|-------|----------|-------|----------|-------|----------|-------|----------|
| 13.5  | 1.426082 | 14.69 | 1.242714 | 14.69 | 0.349004 | 16.25 | 0.040524 |
| 13.64 | 1.420854 | 14.82 | 1.242864 | 14.82 | 0.349954 | 16.42 | 0.038999 |
| 13.7  | 1.418777 | 15    | 1.242425 | 15    | 0.350845 | 16.67 | 0.037134 |
| 13.85 | 1.414013 | 16.25 | 1.219149 | 16.25 | 0.34497  | 16.83 | 0.036189 |
| 13.92 | 1.411997 | 16.42 | 1.213225 | 16.42 | 0.342765 | 17    | 0.035405 |
| 14    | 1.409854 | 16.67 | 1.203256 | 16.67 | 0.339017 | 18.33 | 0.036729 |
| 14.69 | 1.398302 | 16.83 | 1.196069 | 16.83 | 0.336325 | 18.53 | 0.037824 |
| 14.82 | 1.397479 | 17    | 1.187721 | 17    | 0.333237 | 18.79 | 0.039449 |
| 15    | 1.397027 | 18.33 | 1.094208 | 18.33 | 0.303017 | 18.93 | 0.040394 |
| 16.25 | 1.414802 | 18.53 | 1.07532  | 18.53 | 0.297854 | 19.13 | 0.041801 |
| 16.42 | 1.419906 | 18.79 | 1.048685 | 18.79 | 0.291016 | 19.35 | 0.041801 |
| 16.67 | 1.428523 | 18.93 | 1.033347 | 18.93 | 0.287291 | 19.55 | 0.044859 |
| 16.83 | 1.434721 | 19.76 | 0.927965 | 19.76 | 0.265004 | 19.76 | 0.046386 |
| 17    | 1.441882 | 19.92 | 0.904902 | 19.92 | 0.260733 | 19.92 | 0.04753  |
| 18.33 | 1.517203 | 20.11 | 0.876465 | 20.11 | 0.255694 | 20.11 | 0.048853 |
| 18.53 | 1.531237 | 20.33 | 0.842231 | 20.33 | 0.24992  | 20.33 | 0.050325 |
| 18.79 | 1.550374 | 20.58 | 0.801851 | 20.58 | 0.243454 | 20.58 | 0.051902 |
| 18.93 | 1.561059 | 20.74 | 0.775323 | 20.74 | 0.239376 | 20.74 | 0.05285  |
| 19.13 | 1.576726 | 20.95 | 0.739886 | 20.95 | 0.234104 | 20.95 | 0.054017 |
| 19.55 | 1.610842 | 21.12 | 0.710831 | 21.12 | 0.229907 | 21.12 | 0.054894 |
| 19.76 | 1.628297 | 21.36 | 0.669529 | 21.36 | 0.224099 | 21.36 | 0.056024 |
| 19.92 | 1.64167  | 21.82 | 0.590745 | 21.82 | 0.213372 | 21.82 | 0.057828 |
| 20.11 | 1.65754  | 22.44 | 0.489166 | 22.44 | 0.199808 | 22.44 | 0.059501 |
| 20.33 | 1.675768 | 23.1  | 0.391785 | 23.1  | 0.186536 | 23.1  | 0.060354 |
| 20.58 | 1.696085 | 23.43 | 0.34832  | 23.43 | 0.180349 | 23.43 | 0.060438 |
| 20.74 | 1.708759 | 23.65 | 0.321406 | 23.65 | 0.176389 | 23.65 | 0.060374 |
| 20.95 | 1.724885 | 23.85 | 0.298377 | 23.85 | 0.172902 | 23.85 | 0.060233 |
| 21.12 | 1.737438 | 24    | 0.281996 | 24    | 0.170355 | 24    | 0.060078 |
| 21.36 | 1.754278 | 24.56 | 0.227356 | 24.33 | 0.164957 | 24.33 | 0.059589 |
| 21.82 | 1.783249 | 24.74 | 0.211871 | 24.56 | 0.161359 | 24.56 | 0.05913  |
| 22.44 | 1.814806 | 24.95 | 0.195002 | 24.74 | 0.158634 | 24.74 | 0.058706 |
| 23.1  | 1.839254 | 25.13 | 0.181519 | 24.95 | 0.155555 | 24.95 | 0.058139 |
| 23.43 | 1.848405 | 25.35 | 0.1662   | 25.13 | 0.152999 | 25.13 | 0.057592 |
| 23.65 | 1.85354  | 25.55 | 0.153319 | 25.35 | 0.149979 | 25.35 | 0.056848 |
| 23.85 | 1.857615 | 25.75 | 0.141376 | 25.55 | 0.14733  | 25.55 | 0.0561   |
| 24    | 1.860336 | 25.95 | 0.130311 | 25.75 | 0.14477  | 25.75 | 0.055286 |
| 24.33 | 1.865435 | 26.13 | 0.121058 | 25.95 | 0.142298 | 25.95 | 0.054405 |
| 24.56 | 1.868363 | 26.39 | 0.10879  | 26.13 | 0.140147 | 26.13 | 0.053556 |
| 24.74 | 1.870347 | 26.52 | 0.103112 | 26.39 | 0.13716  | 26.39 | 0.052235 |
| 24.95 | 1.872364 | 26.73 | 0.094535 | 26.52 | 0.135719 | 26.52 | 0.051534 |
| 25.13 | 1.873869 | 26.92 | 0.087374 | 26.73 | 0.133461 | 26.73 | 0.050343 |
| 25.35 | 1.875464 | 27.19 | 0.078035 | 26.92 | 0.131491 | 26.92 | 0.049205 |
| 25.55 | 1.876712 | 27.36 | 0.072704 | 27.19 | 0.128809 | 27.19 | 0.047491 |
| 25.75 | 1.877794 | 27.55 | 0.067165 | 27.36 | 0.127187 | 27.36 | 0.046354 |
| 25.95 | 1.878732 | 27.74 | 0.062041 | 27.55 | 0.125433 | 27.55 | 0.045034 |
| 26.13 | 1.87947  | 27.99 | 0.055878 | 27.74 | 0.123739 | 27.74 | 0.043662 |

|       |          |       |          |       |          |       |          |
|-------|----------|-------|----------|-------|----------|-------|----------|
| 26.39 | 1.880383 | 28.19 | 0.051386 | 27.99 | 0.121594 | 27.99 | 0.041782 |
| 26.52 | 1.880781 | 28.3  | 0.04907  | 28.19 | 0.119943 | 28.19 | 0.040223 |
| 26.73 | 1.881354 | 28.5  | 0.045121 | 28.3  | 0.119058 | 28.3  | 0.039346 |
| 26.92 | 1.881806 | 28.7  | 0.041488 | 28.5  | 0.117488 | 28.5  | 0.037718 |
| 27.19 | 1.882359 | 28.9  | 0.038148 | 28.7  | 0.115966 | 28.7  | 0.036057 |
| 27.36 | 1.882659 | 29.1  | 0.035076 | 28.9  | 0.114483 | 28.9  | 0.034362 |
| 27.55 | 1.882957 | 29.3  | 0.032254 | 29.1  | 0.113037 | 29.1  | 0.032648 |
| 27.74 | 1.883223 | 29.5  | 0.02966  | 29.3  | 0.111625 | 29.3  | 0.03092  |
| 27.99 | 1.883529 | 29.7  | 0.027277 | 29.5  | 0.11024  | 29.5  | 0.029188 |
| 28.19 | 1.883743 | 29.8  | 0.02616  | 29.7  | 0.108878 | 29.7  | 0.027461 |
| 28.3  | 1.883851 | 30.5  | 0.01954  | 29.8  | 0.108205 | 29.8  | 0.026602 |
| 28.5  | 1.884031 | 30.9  | 0.016558 | 30.5  | 0.103601 | 30.5  | 0.020798 |
| 28.7  | 1.884193 | 31.1  | 0.015249 | 30.9  | 0.101031 | 30.9  | 0.017739 |
| 28.9  | 1.884341 | 31.25 | 0.014339 | 31.1  | 0.099759 | 31.1  | 0.016303 |
| 29.1  | 1.884474 | 31.53 | 0.012788 | 31.25 | 0.098812 | 31.25 | 0.015272 |
| 29.3  | 1.884595 | 31.76 | 0.011647 | 31.53 | 0.097057 | 31.53 | 0.013455 |
| 29.5  | 1.884707 | 31.96 | 0.010743 | 31.76 | 0.09563  | 31.76 | 0.012074 |
| 29.7  | 1.884809 | 32.14 | 0.009993 | 31.96 | 0.094402 | 31.96 | 0.010955 |
| 29.8  | 1.884857 | 32.34 | 0.009226 | 32.14 | 0.093307 | 32.14 | 0.010012 |
| 30.5  | 1.885151 | 32.56 | 0.008453 | 32.34 | 0.092103 | 32.34 | 0.009037 |
| 30.9  | 1.885291 | 32.73 | 0.007905 | 32.56 | 0.090796 | 32.56 | 0.008048 |
| 31.1  | 1.885355 | 34.42 | 0.004154 | 32.73 | 0.089798 | 32.73 | 0.007343 |
| 31.25 | 1.885402 | 37    | 0.001706 | 32.91 | 0.088755 | 32.91 | 0.006649 |
| 31.53 | 1.885483 | 39.99 | 0.000689 |       | 0.087442 | 33.14 | 0.00584  |
| 31.76 | 1.885546 | 40.06 | 0.000676 | 33.26 | 0.086766 | 33.26 | 0.005449 |
| 31.96 | 1.885598 | 41    | 0.000519 | 33.52 | 0.085323 | 33.52 | 0.004674 |
| 32.14 | 1.885644 | 42.3  | 0.000366 | 33.64 | 0.084668 | 33.64 | 0.004348 |
| 32.34 | 1.885692 | 43.2  | 0.00029  | 33.93 | 0.083111 | 33.93 | 0.003633 |
| 32.56 | 1.885743 | 44    | 0.000237 | 34.04 | 0.082531 | 34.04 | 0.003388 |
| 32.73 | 1.88578  | 46.6  | 0.00013  | 34.25 | 0.081439 | 34.25 | 0.002955 |
| 32.91 | 1.885819 | 47.8  | 0.000101 | 34.42 | 0.08057  | 34.42 | 0.002638 |
| 33.14 | 1.885867 | 48.23 | 9.3e-05  | 34.63 | 0.079514 | 34.63 | 0.002283 |
| 33.26 | 1.885891 | 49.3  | 7.6e-05  | 34.87 | 0.078332 | 34.87 | 0.001922 |
| 33.52 | 1.885941 | 50.32 | 6.3e-05  | 35.04 | 0.077511 | 35.04 | 0.001693 |
| 33.64 | 1.885963 | 51.64 | 4.9e-05  | 35.32 | 0.076185 | 35.32 | 0.00136  |
| 33.93 | 1.886015 |       |          | 35.53 | 0.075213 | 35.53 | 0.001141 |
| 34.04 | 1.886034 |       |          | 35.76 | 0.074169 | 35.76 | 0.00093  |
| 34.25 | 1.88607  |       |          | 35.88 | 0.073633 | 35.88 | 0.00083  |
| 34.42 | 1.886098 |       |          | 36.26 | 0.071974 | 36.26 | 0.000554 |
| 34.63 | 1.886131 |       |          | 36.53 | 0.070828 | 36.53 | 0.000392 |
| 34.87 | 1.886167 |       |          | 36.87 | 0.069424 | 36.87 | 0.000221 |
| 35.04 | 1.886192 |       |          | 37    | 0.068898 | 37    | 0.000164 |
| 35.32 | 1.886231 |       |          | 37.7  | 0.066165 | 37.7  | 7.7e-05  |
| 35.53 | 1.88626  |       |          | 37.8  | 0.065787 | 37.8  | 0.000104 |
| 35.76 | 1.886289 |       |          | 38.3  | 0.063947 | 38.3  | 0.000217 |
| 35.88 | 1.886305 |       |          | 38.7  | 0.062528 | 38.7  | 0.000285 |

|       |          |       |          |       |          |
|-------|----------|-------|----------|-------|----------|
| 36.26 | 1.88635  | 38.9  | 0.061836 | 38.9  | 0.000313 |
| 36.53 | 1.886381 | 39.04 | 0.061358 | 39.04 | 0.00033  |
| 36.87 | 1.886417 | 39.23 | 0.060718 | 39.23 | 0.000352 |
| 37    | 1.88643  | 39.46 | 0.059956 | 39.46 | 0.000375 |
| 37.7  | 1.886497 | 39.77 | 0.058951 | 39.77 | 0.0004   |
| 37.8  | 1.886506 | 39.99 | 0.058253 | 39.99 | 0.000415 |
| 38.3  | 1.886548 | 40.06 | 0.058033 | 40.06 | 0.00042  |
| 38.7  | 1.886578 | 41    | 0.055196 | 41    | 0.00046  |
| 38.9  | 1.886593 | 42.3  | 0.051595 | 42.3  | 0.000476 |
| 39.04 | 1.886603 | 43.2  | 0.049302 | 43.2  | 0.000469 |
| 39.23 | 1.886616 | 44    | 0.04739  | 44    | 0.000455 |
| 39.46 | 1.886631 | 46.6  | 0.041899 | 46.6  | 0.000375 |
| 39.77 | 1.88665  | 47.8  | 0.039692 | 47.8  | 0.000328 |
| 39.99 | 1.886663 | 48.23 | 0.038946 | 48.23 | 0.000312 |
| 40.06 | 1.886668 | 49.3  | 0.037182 | 49.3  | 0.00027  |
| 41    | 1.886717 | 50.32 | 0.035617 | 50.32 | 0.000232 |

**S. Table 13.** Transition electric dipole moments between low-lying  $1,3\Sigma^+$  electronic states of the  $\text{BeCs}^+$  molecular ion.

| $R(\text{Bohr})$ | $3^1\Sigma^+ - 2^1\Sigma^+$ | $R(\text{Bohr})$ | $4^1\Sigma^+ - 2^1\Sigma^+$ | $R(\text{Bohr})$ | $4^1\Sigma^+ - 3^1\Sigma^+$ | $R(\text{Bohr})$ | $5^1\Sigma^+ - 4^1\Sigma^+$ |
|------------------|-----------------------------|------------------|-----------------------------|------------------|-----------------------------|------------------|-----------------------------|
| 4.5              | 0.74955                     | 4.5              | 1.218567                    | 4.5              | 0.33999                     | 4.5              | 1.881608                    |
| 4.6              | 0.83106                     | 4.6              | 1.168314                    | 4.6              | 0.35523                     | 4.6              | 2.11736                     |
| 4.7              | 0.893213                    | 4.7              | 1.119582                    | 4.7              | 0.386248                    | 4.7              | 2.336072                    |
| 4.8              | 0.94638                     | 4.8              | 1.075197                    | 4.8              | 0.427909                    | 4.8              | 2.535635                    |
| 4.9              | 0.994811                    | 4.9              | 1.0366                      | 4.9              | 0.478458                    | 4.9              | 2.715467                    |
| 5                | 1.040554                    | 5                | 0.693238                    | 5                | 1.419745                    | 5                | 1.773994                    |
| 5.1              | 1.084704                    | 5.1              | 0.646111                    | 5.1              | 1.446641                    | 5.1              | 1.90358                     |
| 5.2              | 1.127887                    | 5.2              | 0.596187                    | 5.2              | 1.46689                     | 5.2              | 2.013423                    |
| 5.3              | 1.170475                    | 5.3              | 0.543737                    | 5.3              | 1.479198                    | 5.3              | 2.101873                    |
| 5.4              | 1.212689                    | 5.4              | 0.488969                    | 5.4              | 1.482315                    | 5.4              | 2.168464                    |
| 5.5              | 1.254659                    | 5.5              | 0.432048                    | 5.5              | 1.475043                    | 5.5              | 2.21384                     |
| 5.6              | 1.296452                    | 5.6              | 0.373119                    | 5.6              | 1.456258                    | 5.6              | 2.239633                    |
| 5.7              | 1.338089                    | 5.7              | 0.31231                     | 5.7              | 1.424956                    | 5.7              | 2.248266                    |
| 5.8              | 1.379564                    | 5.8              | 0.249747                    | 5.8              | 1.380298                    | 5.8              | 2.242702                    |
| 5.9              | 1.420844                    | 5.9              | 0.185557                    | 5.9              | 1.321684                    | 5.9              | 2.226175                    |
| 6                | 1.461886                    | 6                | 0.119893                    | 6                | 1.248813                    | 6                | 2.201907                    |
| 6.1              | 1.502644                    | 6.1              | 0.052943                    | 6.1              | 1.161762                    | 6.1              | 2.172862                    |
| 6.2              | 1.543075                    | 6.2              | -0.015056                   | 6.2              | 1.061051                    | 6.2              | 2.141581                    |
| 6.3              | 1.583163                    | 6.3              | -0.083798                   | 6.3              | 0.947685                    | 6.3              | 2.110081                    |
| 6.4              | 1.622922                    | 6.4              | -0.152913                   | 6.4              | 0.82317                     | 6.4              | 2.079848                    |
| 6.5              | 1.662411                    | 6.5              | -0.221962                   | 6.5              | 0.689474                    | 6.5              | 2.051871                    |
| 6.6              | 1.701741                    | 6.6              | -0.290449                   | 6.6              | 0.548937                    | 6.6              | 2.026724                    |
| 6.7              | 1.741071                    | 6.7              | -0.357845                   | 6.7              | 0.404135                    | 6.7              | 2.004659                    |
| 6.8              | 1.780605                    | 6.8              | -0.423607                   | 6.8              | 0.257712                    | 6.8              | 1.985696                    |
| 6.9              | 1.820574                    | 6.9              | -0.48721                    | 6.9              | 0.112202                    | 6.9              | 1.969694                    |

|       |          |       |           |       |          |       |           |
|-------|----------|-------|-----------|-------|----------|-------|-----------|
| 7     | 1.861216 | 7     | -0.54817  | 7.1   | 0.1674   | 7     | 1.956416  |
| 7.1   | 1.902761 | 7.1   | -0.606062 | 7.25  | 0.360822 | 7.1   | 1.945565  |
| 7.25  | 1.967191 | 7.25  | -0.686404 | 7.3   | 0.42152  | 7.25  | 1.933112  |
| 7.3   | 1.989304 | 7.3   | -0.711323 | 7.45  | 0.591572 | 7.3   | 1.929805  |
| 7.45  | 2.057692 | 7.45  | -0.7802   | 7.5   | 0.644232 | 7.45  | 1.169252  |
| 7.5   | 2.081182 | 7.5   | -0.80116  | 7.65  | 0.79063  | 7.5   | 1.089435  |
| 7.65  | 2.153677 | 7.65  | -0.857999 | 7.7   | 0.83578  | 7.65  | 0.854841  |
| 7.7   | 2.178484 | 7.7   | -0.874944 | 7.8   | 0.9211   | 7.7   | 0.778396  |
| 7.8   | 2.228974 | 7.8   | -0.905892 | 7.9   | 1.000416 | 7.8   | 0.62829   |
| 7.9   | 2.280513 | 7.9   | -0.933014 | 8     | 1.074549 | 7.9   | 0.481972  |
| 8     | 2.332935 | 8     | -0.956459 | 8.1   | 1.144345 | 8     | 0.339462  |
| 8.1   | 2.386066 | 8.1   | -0.976403 | 8.2   | 1.210656 | 8.3   | -0.065772 |
| 8.2   | 2.439727 | 8.2   | -0.993042 | 8.3   | 1.274309 | 8.4   | -0.19377  |
| 8.3   | 2.493745 | 8.3   | -1.006585 | 8.4   | 1.336104 | 8.5   | -0.318447 |
| 8.4   | 2.547956 | 8.4   | -1.017249 | 8.5   | 1.396801 | 8.6   | -0.439948 |
| 8.5   | 2.602207 | 8.5   | -1.025258 | 8.6   | 1.457124 | 8.7   | -0.558409 |
| 8.6   | 2.656365 | 8.6   | -1.030829 | 8.7   | 1.517753 | 8.8   | -0.673961 |
| 8.7   | 2.710315 | 8.7   | -1.034177 | 8.8   | 1.579334 | 8.9   | -0.786705 |
| 8.8   | 2.76396  | 8.8   | -1.035507 | 8.9   | 1.642474 | 9     | -0.896721 |
| 8.9   | 2.817221 | 8.9   | -1.035013 | 9     | 1.707748 | 9.1   | -1.004023 |
| 9     | 2.870038 | 9     | -1.032871 | 9.1   | 1.775698 | 9.2   | -1.108561 |
| 9.1   | 2.922367 | 9.1   | -1.029243 | 10.85 | 3.555874 | 9.3   | -1.210197 |
| 9.2   | 2.974181 | 9.2   | -1.024271 | 11    | 3.707369 | 9.43  | -1.337548 |
| 9.3   | 3.025464 | 9.3   | -0.278725 | 11.1  | 3.800093 | 9.5   | -1.403593 |
| 9.43  | 3.091335 | 9.43  | -0.225809 | 11.25 | 3.926132 | 9.66  | -1.546555 |
| 9.5   | 3.126436 | 9.5   | -0.19755  | 11.3  | 3.964681 | 9.7   | -1.58026  |
| 9.66  | 3.205735 | 9.66  | -0.133546 | 11.4  | 4.036749 | 9.87  | -1.712076 |
| 9.7   | 3.225365 | 9.7   | -0.117667 | 11.56 | 4.13892  | 9.93  | -1.753378 |
| 9.87  | 3.307989 | 9.87  | -0.050705 | 11.6  | 4.162114 | 10    | -1.797442 |
| 9.93  | 3.336858 | 9.93  | -0.027283 | 11.75 | 4.241534 | 10.1  | -1.851638 |
| 10    | 3.370362 | 10    | -0.000111 | 11.8  | 4.265556 | 10.25 | -1.910275 |
| 10.1  | 3.417915 | 10.1  | 0.038365  | 11.99 | 4.347024 | 10.3  | -1.922971 |
| 10.25 | 3.488636 | 10.25 | 0.095089  | 12.1  | 4.38792  | 10.43 | -1.938179 |
| 10.3  | 3.512066 | 10.3  | 0.11365   | 12.21 | 4.424848 | 10.52 | -1.932801 |
| 10.43 | 3.572692 | 10.43 | 0.160812  | 12.3  | 4.452419 | 10.66 | -1.897859 |
| 10.52 | 3.61445  | 10.52 | 0.192309  | 12.46 | 4.496241 | 10.7  | -1.882026 |
| 10.66 | 3.679125 | 10.66 | 0.238893  | 12.5  | 4.506255 | 10.85 | -1.801043 |
| 10.7  | 3.697552 | 10.7  | 0.251576  | 12.64 | 4.538636 | 11    | -1.690171 |
| 10.85 | 3.766503 | 10.85 | 0.794075  | 12.7  | 4.551334 | 11.1  | -1.603103 |
| 11    | 3.835299 | 11    | 0.762933  | 12.82 | 4.574793 | 11.25 | -1.458448 |
| 11.1  | 3.881129 | 11.1  | 0.742385  | 12.9  | 4.589093 | 11.3  | -1.40758  |
| 11.25 | 3.949902 | 11.25 | 0.712434  | 13    | 4.605574 | 11.4  | -1.303355 |
| 11.3  | 3.972848 | 11.3  | 0.702775  | 13.1  | 4.620605 | 11.56 | -1.133242 |
| 11.4  | 4.018794 | 11.4  | 0.684052  | 13.26 | 4.641861 | 11.6  | -1.090615 |
| 11.56 | 4.092516 | 11.56 | 0.655955  | 13.3  | 4.646668 | 11.75 | -0.932111 |
| 11.6  | 4.110997 | 11.6  | 0.649314  | 13.46 | 4.664003 | 11.8  | -0.880056 |

|       |          |       |          |       |          |       |           |
|-------|----------|-------|----------|-------|----------|-------|-----------|
| 11.75 | 4.180522 | 11.75 | 0.625827 | 13.5  | 4.66788  | 11.99 | -0.687204 |
| 11.8  | 4.203786 | 11.8  | 0.618491 | 13.64 | 4.680087 | 12.1  | -0.579668 |
| 11.99 | 4.292649 | 11.99 | 0.592809 | 13.7  | 4.684689 | 12.21 | -0.475318 |
| 12.1  | 4.344474 | 12.1  | 0.579444 | 13.85 | 4.694612 | 12.3  | -0.392297 |
| 12.21 | 4.396607 | 12.21 | 0.567094 | 13.92 | 4.698492 | 12.46 | -0.249703 |
| 12.3  | 4.439508 | 12.3  | 0.557688 | 14    | 4.702361 | 12.5  | -0.214995 |
| 12.46 | 4.516361 | 12.46 | 0.542369 | 14.69 | 4.712271 | 12.64 | -0.096255 |
| 12.5  | 4.535698 | 12.5  | 0.538796 | 14.82 | 4.709711 | 12.7  | -0.046573 |
| 12.64 | 4.603781 | 12.64 | 0.527007 | 15    | 4.703979 | 12.82 | 0.050863  |
| 12.7  | 4.633159 | 12.7  | 0.522266 | 16.25 | 4.599726 | 12.9  | 0.114535  |
| 12.82 | 4.692286 | 12.82 | 0.513283 | 16.42 | 4.577657 | 13    | 0.192864  |
| 12.9  | 4.731984 | 12.9  | 0.507624 | 16.67 | 4.542176 | 13.1  | 0.269992  |
| 13    | 4.781931 | 13    | 0.500873 | 16.83 | 4.51767  | 13.26 | 0.391408  |
| 13.1  | 4.832243 | 13.1  | 0.494434 | 17    | 4.490179 | 13.3  | 0.421464  |
| 13.26 | 4.913513 | 13.26 | 0.484665 | 20.33 | 0.594296 | 13.46 | 0.540852  |
| 13.3  | 4.933982 | 13.3  | 0.482307 | 20.58 | 0.667244 | 13.5  | 0.570553  |
| 13.46 | 5.016455 | 13.46 | 0.473143 | 20.74 | 0.713751 | 13.64 | 0.674318  |
| 13.5  | 5.037224 | 13.5  | 0.470905 | 20.95 | 0.774186 | 13.7  | 0.718787  |
| 13.64 | 5.110388 | 13.64 | 0.463189 | 21.12 | 0.822334 | 13.85 | 0.830275  |
| 13.7  | 5.141967 | 13.7  | 0.459922 | 21.36 | 0.888663 | 13.92 | 0.882584  |
| 13.85 | 5.221497 | 13.85 | 0.451801 | 21.82 | 1.008528 | 14    | 0.942687  |
| 13.92 | 5.25889  | 13.92 | 0.448012 | 22.44 | 1.150676 | 14.69 | 1.487315  |
| 14    | 5.301837 | 14    | 0.443666 | 23.1  | 1.274416 | 14.82 | 1.597629  |
| 14.69 | 5.680802 | 14.69 | 0.403652 | 23.43 | 1.32593  | 15    | 1.755695  |
| 14.82 | 5.753658 | 14.82 | 0.39526  | 23.65 | 1.356786 | 16.25 | 3.061165  |
| 15    | 5.855101 | 15    | 0.383013 | 23.85 | 1.382621 | 16.42 | 3.266018  |
| 16.25 | 6.562208 | 16.25 | 0.27074  | 24    | 1.400718 | 16.67 | 3.574735  |
| 16.42 | 6.655893 | 16.42 | 0.250924 | 24.33 | 1.437074 | 16.83 | 3.775042  |
| 16.67 | 6.790907 | 16.67 | 0.219465 | 24.56 | 1.45995  | 17    | 3.988304  |
| 16.83 | 6.87513  | 16.83 | 0.19782  | 24.74 | 1.476644 | 18.33 | 5.49421   |
| 17    | 6.96231  | 17    | 0.173479 | 24.95 | 1.49496  | 18.53 | 5.679387  |
| 18.33 | 7.505349 | 18.33 | 0.068568 | 25.13 | 1.509809 | 18.79 | 5.903308  |
| 18.53 | 7.554638 | 18.53 | 0.113187 | 25.35 | 1.527067 | 18.93 | 6.016588  |
| 18.79 | 7.600626 | 18.79 | 0.174344 | 25.55 | 1.54206  | 19.76 | 6.6045    |
| 18.93 | 7.615959 | 18.93 | 0.208702 | 25.75 | 1.556534 | 19.92 | 6.705214  |
| 19.13 | 7.625242 | 19.13 | 0.259425 | 25.95 | 1.570614 | 20.11 | 6.821047  |
| 19.35 | 7.625242 | 19.55 | 0.371632 | 26.13 | 1.583048 | 20.33 | 6.950918  |
| 19.55 | 7.590807 | 19.76 | 0.43017  | 26.39 | 1.600763 | 20.58 | 7.094108  |
| 19.76 | 7.543373 | 19.92 | 3.849817 | 26.52 | 1.609568 | 20.74 | 7.183834  |
| 19.92 | 7.492694 | 20.11 | 3.800309 | 26.73 | 1.623787 | 20.95 | 7.299882  |
| 20.11 | 7.415605 | 20.33 | 3.742153 | 26.92 | 1.636701 | 21.12 | 7.392743  |
| 20.33 | 7.302922 | 20.58 | 3.675112 | 27.19 | 1.655292 | 21.36 | 7.522721  |
| 20.58 | 7.144272 | 20.74 | 3.631754 | 27.36 | 1.667081 | 21.82 | 7.770188  |
| 20.74 | 7.025945 | 20.95 | 3.574429 | 27.55 | 1.680409 | 22.44 | 8.104938  |
| 20.95 | 6.85159  | 21.12 | 3.527772 | 27.74 | 1.693901 | 23.1  | 8.467531  |
| 21.12 | 6.695484 | 21.36 | 3.461709 | 27.99 | 1.711886 | 23.43 | 8.651921  |

|       |          |       |          |       |          |       |           |
|-------|----------|-------|----------|-------|----------|-------|-----------|
| 21.36 | 6.454402 | 21.82 | 3.335422 | 28.19 | 1.726444 | 23.65 | 8.775941  |
| 21.82 | 5.9368   | 22.44 | 3.169008 | 28.3  | 1.734495 | 23.85 | 8.88934   |
| 22.44 | 5.168541 | 23.1  | 3.001037 | 28.5  | 1.749182 | 24    | 8.97472   |
| 23.1  | 4.336276 | 23.43 | 2.921583 | 28.7  | 1.76388  | 24.33 | 9.163166  |
| 23.43 | 3.936631 | 23.65 | 2.870384 | 28.9  | 1.77851  | 24.56 | 9.294579  |
| 23.65 | 3.680705 | 23.85 | 2.825049 | 29.1  | 1.792993 | 24.74 | 9.397145  |
| 23.85 | 3.456618 | 24    | 2.791777 | 29.3  | 1.807238 | 24.95 | 9.516131  |
| 24    | 3.294348 | 24.33 | 2.720636 | 29.5  | 1.821149 | 25.13 | 9.617199  |
| 24.33 | 2.955924 | 24.56 | 2.672559 | 29.7  | 1.834636 | 25.35 | 9.739045  |
| 24.56 | 2.735634 | 24.74 | 2.635681 | 29.8  | 1.841191 | 25.55 | 9.847629  |
| 24.74 | 2.57228  | 24.95 | 2.593357 | 30.5  | 1.882663 | 25.75 | 9.953478  |
| 24.95 | 2.391703 | 25.13 | 2.557568 | 30.9  | 1.902274 | 25.95 | 10.055871 |
| 25.13 | 2.24535  | 25.35 | 2.514282 | 31.1  | 1.910865 | 26.13 | 10.144395 |
| 25.35 | 2.076803 | 25.55 | 2.47521  | 31.25 | 1.916775 | 26.39 | 10.264783 |
| 25.55 | 1.933148 | 25.75 | 2.436241 | 31.53 | 1.926606 | 26.52 | 10.321046 |
| 25.75 | 1.798278 | 25.95 | 2.397214 | 31.76 | 1.933555 | 26.73 | 10.405383 |
| 25.95 | 1.671844 | 26.13 | 2.361902 | 31.96 | 1.938817 | 26.92 | 10.473673 |
| 26.13 | 1.564939 | 26.39 | 2.310326 | 32.14 | 1.942971 | 27.19 | 10.555277 |
| 26.39 | 1.421473 | 26.52 | 2.284187 | 32.34 | 1.946983 | 27.36 | 10.59593  |
| 26.52 | 1.354363 | 26.73 | 2.241313 | 32.56 | 1.950723 | 27.55 | 10.630166 |
| 26.73 | 1.252091 | 26.92 | 2.201697 | 32.73 | 1.953172 | 27.74 | 10.651243 |
| 26.92 | 1.165816 | 27.19 | 2.143728 | 32.91 | 1.955382 | 27.99 | 10.656551 |
| 27.19 | 1.051918 | 27.36 | 2.10615  | 33.14 | 1.957693 | 28.19 | 10.640492 |
| 27.36 | 0.986259 | 27.55 | 2.063004 | 33.26 | 1.958692 | 28.3  | 10.623324 |
| 27.55 | 0.917457 | 27.74 | 2.018546 | 33.52 | 1.960424 | 28.5  | 10.575985 |
| 27.74 | 0.853225 | 27.99 | 1.957918 | 33.64 | 1.961045 | 28.7  | 10.506683 |
| 27.99 | 0.775207 | 28.19 | 1.907579 | 33.93 | 1.962142 | 28.9  | 10.414297 |
| 28.19 | 0.71775  | 28.3  | 1.879183 | 34.04 | 1.962426 | 29.1  | 10.297955 |
| 28.3  | 0.687919 | 28.5  | 1.826254 | 34.25 | 1.962793 | 29.3  | 10.157165 |
| 28.5  | 0.636706 | 28.7  | 1.771664 | 34.42 | 1.962941 | 29.5  | 9.991849  |
| 28.7  | 0.589188 | 28.9  | 1.715474 | 34.63 | 1.962965 | 29.7  | 9.802373  |
| 28.9  | 0.545114 | 29.1  | 1.657781 | 34.87 | 1.962811 | 29.8  | 9.698823  |
| 29.1  | 0.504245 | 29.3  | 1.598728 | 35.04 | 1.962601 | 30.5  | 8.826606  |
| 29.3  | 0.466373 | 29.5  | 1.538501 | 35.32 | 1.962109 | 30.9  | 8.236041  |
| 29.5  | 0.43129  | 29.7  | 1.477323 | 35.53 | 1.96164  | 31.1  | 7.924154  |
| 29.7  | 0.398791 | 29.8  | 1.446458 | 35.76 | 1.961048 | 31.25 | 7.685304  |
| 29.8  | 0.383459 | 30.5  | 1.228643 | 35.88 | 1.960712 | 31.53 | 7.232582  |
| 30.5  | 0.291237 | 30.9  | 1.106216 | 36.26 | 1.959554 | 31.76 | 6.85831   |
| 30.9  | 0.248788 | 31.1  | 1.046548 | 36.53 | 1.958666 | 31.96 | 6.534235  |
| 31.1  | 0.229931 | 31.25 | 1.002694 | 36.87 | 1.957497 | 32.14 | 6.24555   |
| 31.25 | 0.216738 | 31.53 | 0.923262 | 37    | 1.95704  | 32.34 | 5.929891  |
| 31.53 | 0.19409  | 31.76 | 0.860699 | 39.04 | 1.949855 | 32.56 | 5.590703  |
| 31.76 | 0.177264 | 31.96 | 0.808465 | 40.06 | 1.946556 | 32.73 | 5.335481  |
| 31.96 | 0.163825 | 34.04 | 0.396529 | 44    | 1.93639  | 32.91 | 5.072625  |
| 35.04 | 0.048463 | 36.87 | 0.138945 | 46.6  | 1.931509 | 40.06 | 0.500858  |
| 44    | 0.002678 | 40.06 | 0.041986 | 47.8  | 1.929619 | 46.6  | 0.064243  |

|       |          |       |          |       |          |       |          |
|-------|----------|-------|----------|-------|----------|-------|----------|
| 48.23 | 0.003001 | 41    | 0.02967  | 48.23 | 1.928989 | 48.23 | 0.039657 |
| 49.3  | 0.002731 | 49.3  | 0.001779 | 49.3  | 1.927519 | 49.3  | 0.028952 |
| 50.32 | 0.002435 | 50.32 | 0.001294 | 50.32 | 1.926237 | 50.32 | 0.021464 |

**S. Table 14.** Transition electric dipole moments between low-lying  $^3\Sigma^+$  electronic states of the  $\text{BeCs}^+$  molecular ion.

| $R(\text{Bohr})$ | $2^3\Sigma^+ - 1^3\Sigma^+$ | $R(\text{Bohr})$ | $3^3\Sigma^+ - 1^3\Sigma^+$ | $R(\text{Bohr})$ | $3^3\Sigma^+ - 2^3\Sigma^+$ | $R(\text{Bohr})$ | $4^3\Sigma^+ - 3^3\Sigma^+$ |
|------------------|-----------------------------|------------------|-----------------------------|------------------|-----------------------------|------------------|-----------------------------|
| 4.5              | 0.078289                    | 4.5              | 1.439056                    | 4.5              | 1.820208                    | 4.5              | -1.235296                   |
| 4.6              | 0.0466                      | 4.6              | 1.383705                    | 4.6              | 1.826987                    | 4.6              | -1.373886                   |
| 4.7              | 0.012518                    | 4.7              | 1.329827                    | 4.7              | 1.840553                    | 4.7              | -1.522922                   |
| 4.8              | 0.023367                    | 4.8              | 1.277486                    | 4.8              | 1.860267                    | 4.8              | -1.681006                   |
| 4.9              | 0.0606                      | 4.9              | 1.226699                    | 4.9              | 1.885474                    | 4.9              | -1.846437                   |
| 5                | 0.098846                    | 5                | 1.177436                    | 5                | 1.915514                    | 5                | -2.01729                    |
| 5.1              | 0.137858                    | 5.1              | 1.129634                    | 5.1              | 1.94973                     | 5.1              | -2.191475                   |
| 5.2              | 0.177455                    | 5.2              | 1.0832                      | 5.2              | 1.987479                    | 5.2              | -2.366825                   |
| 5.3              | 0.217505                    | 5.3              | 1.038027                    | 5.3              | 2.028139                    | 5.3              | -2.541188                   |
| 5.4              | 0.257911                    | 5.4              | 0.993993                    | 5.4              | 2.071118                    | 5.4              | -2.712506                   |
| 5.5              | 0.298594                    | 5.5              | 0.950973                    | 5.5              | 2.115866                    | 5.5              | -2.878901                   |
| 5.6              | 0.339495                    | 5.6              | 0.908829                    | 5.6              | 2.161885                    | 5.6              | -3.038721                   |
| 5.7              | 0.380562                    | 5.7              | 0.867417                    | 5.7              | 2.208736                    | 5.7              | -3.190568                   |
| 5.8              | 0.421751                    | 5.8              | 0.826577                    | 5.8              | 2.256045                    | 5.8              | -3.333292                   |
| 5.9              | 0.463019                    | 5.9              | 0.786149                    | 5.9              | 2.3035                      | 5.9              | -3.465954                   |
| 6                | 0.504328                    | 6                | 0.745952                    | 6                | 2.350853                    | 6                | -3.587768                   |
| 6.1              | 0.545641                    | 6.1              | 0.705799                    | 6.1              | 2.397912                    | 6.1              | -3.698028                   |
| 6.2              | 0.586912                    | 6.2              | 0.665509                    | 6.2              | 2.444533                    | 6.2              | -3.796048                   |
| 6.3              | 0.628099                    | 6.3              | 0.624898                    | 6.3              | 2.490619                    | 6.3              | -3.881093                   |
| 6.4              | 0.669152                    | 6.4              | 0.583789                    | 6.4              | 2.536112                    | 6.4              | -3.952338                   |
| 6.5              | 0.710024                    | 6.5              | 0.542001                    | 6.5              | 2.580988                    | 6.5              | -4.008837                   |
| 6.6              | 0.750651                    | 6.6              | 0.499388                    | 6.6              | 2.625254                    | 6.6              | -4.049519                   |
| 6.7              | 0.790973                    | 6.7              | 0.455799                    | 6.7              | 2.668943                    | 6.7              | -4.073195                   |
| 6.8              | 0.830921                    | 6.8              | 0.411111                    | 6.8              | 2.712115                    | 6.8              | -4.078574                   |
| 6.9              | 0.87042                     | 6.9              | 0.365195                    | 6.9              | 2.754842                    | 6.9              | -4.06431                    |
| 7                | 0.909389                    | 7                | 0.317981                    | 7                | 2.797206                    | 7                | -4.029036                   |
| 7.1              | 0.947748                    | 7.1              | 0.269406                    | 7.1              | 2.839281                    | 7.1              | -3.97144                    |
| 7.25             | 1.003943                    | 7.25             | 0.193971                    | 7.25             | 2.90197                     | 7.25             | -3.840697                   |
| 7.3              | 1.022268                    | 7.3              | 0.168169                    | 7.3              | 2.922759                    | 7.3              | -3.784851                   |
| 7.45             | 1.075876                    | 7.45             | 0.088973                    | 7.45             | 2.984729                    | 7.45             | -3.579837                   |
| 7.5              | 1.093245                    | 7.5              | 0.06208                     | 7.5              | 3.005205                    | 7.5              | -3.499084                   |
| 7.65             | 1.143696                    | 7.65             | 0.01957                     | 7.65             | 3.065769                    | 7.65             | -3.221235                   |
| 7.7              | 1.15992                     | 7.7              | 0.046942                    | 7.7              | 3.085561                    | 7.7              | -3.117504                   |
| 7.8              | 1.191413                    | 7.8              | 0.101551                    | 7.8              | 3.124327                    | 7.8              | -2.89534                    |
| 7.9              | 1.221566                    | 7.9              | 0.155517                    | 7.9              | 3.161716                    | 7.9              | -2.656477                   |
| 8                | 1.250295                    | 8                | 0.208264                    | 8                | 3.197383                    | 8                | -2.405038                   |
| 8.1              | 1.277531                    | 8.1              | 0.25917                     | 8.1              | 3.231017                    | 8.1              | -2.145649                   |
| 8.2              | 1.303208                    | 8.2              | 0.3077                      | 8.2              | 3.262351                    | 8.2              | -1.88307                    |
| 8.3              | 1.327276                    | 8.3              | 0.353369                    | 8.3              | 3.291212                    | 8.3              | -1.621859                   |

|       |          |       |          |       |          |       |           |
|-------|----------|-------|----------|-------|----------|-------|-----------|
| 8.4   | 1.349687 | 8.4   | 0.395812 | 8.4   | 3.317513 | 8.4   | -1.366036 |
| 8.5   | 1.370409 | 8.5   | 0.434793 | 8.5   | 3.341262 | 8.5   | -1.118845 |
| 8.6   | 1.389414 | 8.6   | 0.470209 | 8.6   | 3.362549 | 8.6   | -0.882633 |
| 8.7   | 1.406693 | 8.7   | 0.502081 | 8.7   | 3.381527 | 8.7   | -0.658843 |
| 8.8   | 1.422241 | 8.8   | 0.530532 | 8.8   | 3.398393 | 8.8   | -0.448089 |
| 8.9   | 1.436058 | 8.9   | 0.555752 | 8.9   | 3.413371 | 8.9   | -0.250331 |
| 9     | 1.448161 | 9     | 0.578006 | 9     | 3.426693 | 9     | -0.064974 |
| 9.1   | 1.458567 | 9.1   | 0.597573 | 9.1   | 3.438588 | 9.1   | 0.108904  |
| 9.2   | 1.467303 | 9.2   | 0.614753 | 9.2   | 3.449278 | 9.2   | 0.272453  |
| 9.3   | 1.474402 | 9.3   | 0.629839 | 9.3   | 3.458965 | 9.3   | 0.426926  |
| 9.43  | 1.481241 | 9.43  | 0.64678  | 9.43  | 3.470367 | 9.43  | 0.616262  |
| 9.5   | 1.483834 | 9.5   | 0.654835 | 9.5   | 3.476064 | 9.5   | 0.713694  |
| 9.66  | 1.486998 | 9.66  | 0.670954 | 9.66  | 3.488252 | 9.66  | 0.927026  |
| 9.7   | 1.487205 | 9.7   | 0.674561 | 9.7   | 3.491165 | 9.7   | 0.978687  |
| 9.87  | 1.485591 | 9.87  | 0.688409 | 9.87  | 3.50319  | 9.87  | 1.192797  |
| 9.93  | 1.484091 | 9.93  | 0.692819 | 9.93  | 3.507358 | 9.93  | 1.266741  |
| 10    | 1.48175  | 10    | 0.697716 | 10    | 3.512212 | 10    | 1.352233  |
| 10.1  | 1.477341 | 10.1  | 0.70432  | 10.1  | 3.519176 | 10.1  | 1.47331   |
| 10.25 | 1.46849  | 10.25 | 0.713563 | 10.25 | 3.529815 | 10.25 | 1.65352   |
| 10.3  | 1.464972 | 10.3  | 0.71651  | 10.3  | 3.533441 | 10.3  | 1.713401  |
| 10.43 | 1.45457  | 10.43 | 0.723953 | 10.43 | 3.543109 | 10.43 | 1.869001  |
| 10.52 | 1.446358 | 10.52 | 0.72897  | 10.52 | 3.550039 | 10.52 | 1.976804  |
| 10.66 | 1.432051 | 10.66 | 0.736639 | 10.66 | 3.561255 | 10.66 | 2.144799  |
| 10.7  | 1.427639 | 10.7  | 0.738812 | 10.7  | 3.564563 | 10.7  | 2.192869  |
| 10.85 | 1.4099   | 10.85 | 0.746931 | 10.85 | 3.577401 | 10.85 | 2.373312  |
| 11    | 1.390414 | 11    | 0.755053 | 11    | 3.590934 | 11    | 2.553676  |
| 11.1  | 1.376543 | 11.1  | 0.760493 | 11.1  | 3.600342 | 11.1  | 2.673536  |
| 11.25 | 1.354544 | 11.25 | 0.768708 | 11.25 | 3.615016 | 11.25 | 2.852094  |
| 11.3  | 1.346918 | 11.3  | 0.771462 | 11.3  | 3.620051 | 11.3  | 2.911135  |
| 11.4  | 1.331263 | 11.4  | 0.776997 | 11.4  | 3.630329 | 11.4  | 3.028267  |
| 11.56 | 1.305197 | 11.56 | 0.785918 | 11.56 | 3.647301 | 11.56 | 3.212348  |
| 11.6  | 1.298502 | 11.6  | 0.78816  | 11.6  | 3.651638 | 11.6  | 3.257603  |
| 11.75 | 1.272831 | 11.75 | 0.796597 | 11.75 | 3.668193 | 11.75 | 3.424091  |
| 11.8  | 1.264092 | 11.8  | 0.799418 | 11.8  | 3.673803 | 11.8  | 3.478351  |
| 11.99 | 1.230167 | 11.99 | 0.810157 | 11.99 | 3.695458 | 11.99 | 3.678227  |
| 12.1  | 1.210076 | 12.1  | 0.816374 | 12.1  | 3.708178 | 12.1  | 3.789028  |
| 12.21 | 1.189713 | 12.21 | 0.822575 | 12.21 | 3.720977 | 12.21 | 3.896008  |
| 12.3  | 1.172875 | 12.3  | 0.827632 | 12.3  | 3.731475 | 12.3  | 3.980622  |
| 12.46 | 1.142627 | 12.46 | 0.836561 | 12.46 | 3.75011  | 12.46 | 4.124496  |
| 12.5  | 1.135013 | 12.5  | 0.838778 | 12.5  | 3.754748 | 12.5  | 4.159158  |
| 12.64 | 1.108233 | 12.64 | 0.846476 | 12.64 | 3.77086  | 12.64 | 4.276397  |
| 12.7  | 1.096707 | 12.7  | 0.849743 | 12.7  | 3.777688 | 12.7  | 4.324736  |
| 12.82 | 1.073593 | 12.82 | 0.856209 | 12.82 | 3.791159 | 12.82 | 4.418081  |
| 12.9  | 1.058151 | 12.9  | 0.860465 | 12.9  | 3.799973 | 12.9  | 4.477911  |
| 13    | 1.038839 | 13    | 0.865728 | 13    | 3.810771 | 13    | 4.550103  |
| 13.1  | 1.019517 | 13.1  | 0.87088  | 13.1  | 3.821266 | 13.1  | 4.619521  |

|       |          |       |          |       |          |       |          |
|-------|----------|-------|----------|-------|----------|-------|----------|
| 13.26 | 0.988655 | 13.26 | 0.878955 | 13.26 | 3.837352 | 13.26 | 4.725144 |
| 13.3  | 0.980954 | 13.3  | 0.880934 | 13.3  | 3.841219 | 13.3  | 4.750555 |
| 13.46 | 0.950246 | 13.46 | 0.888683 | 13.46 | 3.855979 | 13.46 | 4.848468 |
| 13.5  | 0.942597 | 13.5  | 0.890576 | 13.5  | 3.859478 | 13.5  | 4.872054 |
| 13.64 | 0.915931 | 13.64 | 0.897057 | 13.64 | 3.871063 | 13.64 | 4.951972 |
| 13.7  | 0.90456  | 13.7  | 0.899763 | 13.7  | 3.875691 | 13.7  | 4.985024 |
| 13.85 | 0.876304 | 13.85 | 0.90633  | 13.85 | 3.886296 | 13.85 | 5.064725 |
| 13.92 | 0.86321  | 13.92 | 0.909295 | 13.92 | 3.890743 | 13.92 | 5.100561 |
| 14    | 0.848323 | 14    | 0.912605 | 14    | 3.895407 | 14    | 5.140521 |
| 14.69 | 0.724066 | 14.69 | 0.937418 | 14.69 | 3.914248 | 14.69 | 5.447334 |
| 14.82 | 0.701615 | 14.82 | 0.941313 | 14.82 | 3.912937 | 14.82 | 5.498676 |
| 15    | 0.671092 | 15    | 0.946296 | 15    | 3.908295 | 15    | 5.566896 |
| 16.25 | 0.479434 | 16.25 | 0.968215 | 16.25 | 3.778292 | 16.25 | 5.965392 |
| 16.42 | 0.456346 | 16.42 | 0.969658 | 16.42 | 3.747223 | 16.42 | 6.011012 |
| 16.67 | 0.42375  | 16.67 | 0.971227 | 16.67 | 3.696015 | 16.67 | 6.074854 |
| 16.83 | 0.403748 | 16.83 | 0.971916 | 16.83 | 3.659933 | 16.83 | 6.11375  |
| 17    | 0.383234 | 17    | 0.972401 | 17    | 3.618906 | 17    | 6.153435 |
| 18.33 | 0.248439 | 18.33 | 0.970556 | 18.33 | 3.219515 | 18.33 | 6.405868 |
| 18.53 | 0.231942 | 18.53 | 0.969851 | 18.53 | 3.15032  | 18.53 | 6.43429  |
| 18.79 | 0.211861 | 18.79 | 0.968931 | 18.79 | 3.057948 | 18.79 | 6.466943 |
| 18.93 | 0.201668 | 18.93 | 0.968457 | 18.93 | 3.007242 | 18.93 | 6.482371 |
| 19.76 | 0.14947  | 19.13 | 0.967822 | 19.76 | 2.696989 | 19.13 | 6.501595 |
| 19.92 | 0.140902 | 19.35 | 0.967822 | 19.92 | 2.635961 | 19.35 | 6.501595 |
| 20.11 | 0.131295 | 19.55 | 0.966764 | 20.11 | 2.563236 | 19.55 | 6.530093 |
| 20.33 | 0.12091  | 19.76 | 0.966415 | 20.33 | 2.478831 | 19.76 | 6.537631 |
| 20.58 | 0.110014 | 19.92 | 0.966241 | 20.58 | 2.382865 | 19.92 | 6.540057 |
| 20.74 | 0.103516 | 20.11 | 0.966146 | 20.74 | 2.321522 | 20.11 | 6.538951 |
| 20.95 | 0.095521 | 20.33 | 0.966192 | 20.95 | 2.241214 | 20.33 | 6.531885 |
| 21.12 | 0.08947  | 20.58 | 0.966454 | 21.12 | 2.176444 | 20.58 | 6.515755 |
| 21.36 | 0.081526 | 20.74 | 0.966737 | 21.36 | 2.085541 | 20.74 | 6.500615 |
| 21.82 | 0.068098 | 20.95 | 0.96724  | 21.82 | 1.913609 | 20.95 | 6.474704 |
| 22.44 | 0.053251 | 21.12 | 0.967751 | 22.44 | 1.688634 | 21.12 | 6.448502 |
| 23.1  | 0.040823 | 21.36 | 0.968623 | 23.1  | 1.460907 | 21.36 | 6.403142 |
| 23.43 | 0.035697 | 21.82 | 0.970704 | 23.43 | 1.352706 | 21.82 | 6.287692 |
| 23.65 | 0.032628 | 22.44 | 0.974096 | 23.65 | 1.282954 | 22.44 | 6.070658 |
| 23.85 | 0.030055 | 23.1  | 0.97796  | 23.85 | 1.221301 | 23.1  | 5.763806 |
| 24    | 0.028254 | 23.43 | 0.979831 | 24    | 1.176208 | 23.43 | 5.583683 |
| 24.33 | 0.02465  | 23.65 | 0.981016 | 24.33 | 1.080594 | 23.65 | 5.454892 |
| 24.56 | 0.022404 | 23.85 | 0.982036 | 24.56 | 1.016973 | 23.85 | 5.332402 |
| 24.74 | 0.020782 | 24    | 0.982765 | 24.74 | 0.968958 | 24    | 5.237483 |
| 24.95 | 0.019035 | 24.33 | 0.984225 | 24.95 | 0.914934 | 24.33 | 5.020719 |
| 25.13 | 0.01765  | 24.56 | 0.985126 | 25.13 | 0.870357 | 24.56 | 4.864296 |
| 25.35 | 0.016089 | 24.74 | 0.98576  | 25.35 | 0.818041 | 24.74 | 4.739447 |
| 25.55 | 0.014787 | 24.95 | 0.986415 | 25.55 | 0.772548 | 24.95 | 4.591751 |
| 25.75 | 0.013584 | 25.13 | 0.986917 | 25.75 | 0.72901  | 25.13 | 4.463879 |
| 25.95 | 0.012473 | 25.35 | 0.98744  | 25.95 | 0.687409 | 25.35 | 4.306592 |

|       |          |       |          |       |          |       |          |
|-------|----------|-------|----------|-------|----------|-------|----------|
| 26.13 | 0.011557 | 25.55 | 0.987835 | 26.13 | 0.651592 | 25.55 | 4.163207 |
| 26.39 | 0.010342 | 25.75 | 0.988159 | 26.39 | 0.602531 | 25.75 | 4.019959 |
| 26.52 | 0.009781 | 25.95 | 0.988409 | 26.52 | 0.579159 | 25.95 | 3.877302 |
| 26.73 | 0.008937 | 26.13 | 0.988583 | 26.73 | 0.542994 | 26.13 | 3.749784 |
| 26.92 | 0.008235 | 26.39 | 0.988744 | 26.92 | 0.511925 | 26.39 | 3.567626 |
| 27.19 | 0.007329 | 26.52 | 0.988787 | 27.19 | 0.470377 | 26.52 | 3.477665 |
| 27.36 | 0.006807 | 26.73 | 0.988809 | 27.36 | 0.44573  | 26.73 | 3.334204 |
| 27.55 | 0.006268 | 26.92 | 0.988782 | 27.55 | 0.419514 | 26.92 | 3.206617 |
| 27.74 | 0.00577  | 27.19 | 0.988676 | 27.74 | 0.394654 | 27.19 | 3.029378 |
| 27.99 | 0.005173 | 27.36 | 0.988571 | 27.99 | 0.363921 | 27.36 | 2.920431 |
| 28.19 | 0.004738 | 27.55 | 0.988422 | 28.19 | 0.34088  | 27.55 | 2.801254 |
| 28.3  | 0.004516 | 27.74 | 0.988244 | 28.3  | 0.328769 | 27.74 | 2.684935 |
| 28.5  | 0.004134 | 27.99 | 0.987971 | 28.5  | 0.307731 | 27.99 | 2.536415 |
| 28.7  | 0.003785 | 28.19 | 0.987724 | 28.7  | 0.287909 | 28.19 | 2.421425 |
| 28.9  | 0.003464 | 28.3  | 0.987578 | 28.9  | 0.269246 | 28.3  | 2.359659 |
| 29.1  | 0.00317  | 28.5  | 0.987299 | 29.1  | 0.251685 | 28.5  | 2.250084 |
| 29.3  | 0.0029   | 28.7  | 0.987002 | 29.3  | 0.23517  | 28.7  | 2.144063 |
| 29.5  | 0.002653 | 28.9  | 0.98669  | 29.5  | 0.219648 | 28.9  | 2.041611 |
| 29.7  | 0.002426 | 29.1  | 0.986366 | 29.7  | 0.205068 | 29.1  | 1.94274  |
| 29.8  | 0.002321 | 29.3  | 0.986032 | 29.8  | 0.198115 | 29.3  | 1.847436 |
| 30.5  | 0.001693 | 29.5  | 0.98569  | 30.5  | 0.155191 | 29.5  | 1.755682 |
| 30.9  | 0.001411 | 29.7  | 0.985341 | 30.9  | 0.134694 | 29.7  | 1.667443 |
| 31.1  | 0.001289 | 29.8  | 0.985165 | 31.1  | 0.125413 | 29.8  | 1.624625 |
| 31.25 | 0.001205 | 30.5  | 0.983907 | 31.25 | 0.118846 | 30.5  | 1.348629 |
| 31.53 | 0.001061 | 30.9  | 0.983176 | 31.53 | 0.107433 | 30.9  | 1.208796 |
| 31.76 | 0.000954 | 31.1  | 0.982825 | 31.76 | 0.098829 | 31.1  | 1.143513 |
| 31.96 | 0.000869 | 31.25 | 0.982559 | 31.96 | 0.091872 | 31.25 | 1.096504 |
| 32.14 | 0.000802 | 31.53 | 0.982062 | 32.14 | 0.086005 | 31.53 | 1.013109 |
| 32.34 | 0.000732 | 31.76 | 0.981661 | 32.34 | 0.079896 | 31.76 | 0.948698 |
| 32.56 | 0.00066  | 31.96 | 0.981315 | 32.56 | 0.073646 | 31.96 | 0.895575 |
| 32.73 | 0.00061  | 32.14 | 0.981007 | 32.73 | 0.069132 | 32.14 | 0.849979 |
| 32.91 | 0.000564 | 32.34 | 0.980668 | 32.91 | 0.064635 | 32.34 | 0.801698 |
| 33.14 | 0.000507 | 32.56 | 0.980301 | 33.14 | 0.059289 | 32.56 | 0.751373 |
| 33.26 | 0.000482 | 32.73 | 0.98002  | 33.26 | 0.056667 | 32.73 | 0.714412 |
| 33.52 | 0.000428 | 32.91 | 0.979729 | 33.52 | 0.051353 | 32.91 | 0.677037 |
| 33.64 | 0.000406 | 33.14 | 0.979361 | 33.64 | 0.049063 | 33.14 | 0.631814 |
| 33.93 | 0.000356 | 33.26 | 0.979173 | 33.93 | 0.043918 | 33.26 | 0.609308 |
| 34.04 | 0.000336 | 33.52 | 0.978771 | 34.04 | 0.042103 | 33.52 | 0.562996 |
| 34.25 | 0.00031  | 33.64 | 0.978587 | 34.25 | 0.038833 | 33.64 | 0.542712 |
| 34.42 | 0.000288 | 33.93 | 0.978153 | 34.42 | 0.036362 | 33.93 | 0.4964   |
| 34.63 | 0.000262 | 34.04 | 0.977979 | 34.63 | 0.033517 | 34.04 | 0.479772 |
| 34.87 | 0.000205 | 34.25 | 0.977687 | 34.87 | 0.030514 | 34.25 | 0.449499 |
| 35.04 | 0.000219 | 34.42 | 0.977443 | 35.04 | 0.028554 | 34.42 | 0.42628  |
| 35.32 | 0.000197 | 34.63 | 0.977153 | 35.32 | 0.025582 | 34.63 | 0.399101 |
| 35.53 | 0.000183 | 34.87 | 0.97673  | 35.53 | 0.023546 | 34.87 | 0.370054 |
| 35.76 | 0.000154 | 35.04 | 0.976594 | 35.76 | 0.021491 | 35.04 | 0.350647 |

|       |          |       |          |       |          |       |          |
|-------|----------|-------|----------|-------|----------|-------|----------|
| 35.88 | 0.000145 | 35.32 | 0.976226 | 35.88 | 0.020494 | 35.32 | 0.320739 |
| 36.26 | 0.000145 | 37    | 0.974216 | 40.06 | 0.003804 | 41    | 0.049658 |
| 36.53 | 0.000108 | 40.06 | 0.971308 | 46.6  | 0.000469 | 47.8  | 0.005986 |
| 36.87 | 0.00011  | 48.23 | 0.96663  | 48.23 | 0.000335 | 48.23 | 0.005285 |
| 37    | 0.000106 | 49.3  | 0.966229 | 49.3  | 0.000273 | 49.3  | 0.003875 |
| 50.32 | 6.00E-06 | 50.32 | 0.96588  | 50.32 | 0.000226 | 50.32 | 0.002892 |

**S. Table 15.** Transition electric dipole moments between low-lying  $^1\Pi$  electronic states of the  $\text{BeCs}^+$  molecular ion.

| $R(\text{Bohr})$ | $2\ ^1\Pi - 1^1\Pi$ | $R(\text{Bohr})$ | $3\ ^1\Pi - 1^1\Pi$ | $R(\text{Bohr})$ | $4\ ^1\Pi - 1^1\Pi$ | $R(\text{Bohr})$ | $3\ ^1\Pi - 2^1\Pi$ |
|------------------|---------------------|------------------|---------------------|------------------|---------------------|------------------|---------------------|
| 4.5              | 0.304799            | 4.5              | 0.791449            | 4.5              | 1.010185            | 4.5              | 0.894308            |
| 4.6              | 0.265443            | 4.6              | 0.705768            | 4.6              | 1.153076            | 4.6              | 0.887784            |
| 4.7              | 0.225367            | 4.7              | 0.623281            | 4.7              | 1.273522            | 4.7              | 0.868789            |
| 4.8              | 0.185085            | 4.8              | 0.544587            | 4.8              | 1.367801            | 4.8              | 0.838836            |
| 4.9              | 0.145049            | 4.9              | 0.470112            | 4.9              | 1.438551            | 4.9              | 0.7995              |
| 5                | 0.105634            | 5                | 0.400113            | 5                | 1.490492            | 5                | 0.752378            |
| 5.1              | 0.067144            | 5.1              | 0.334692            | 5.1              | 1.52811             | 5.1              | 0.699041            |
| 5.2              | 0.029817            | 5.2              | 0.27382             | 5.2              | 1.555048            | 5.2              | 0.640979            |
| 5.3              | 0.006166            | 5.3              | 0.217352            | 5.3              | 1.574119            | 5.3              | 0.579561            |
| 5.4              | 0.04068             | 5.4              | 0.165055            | 5.4              | 1.58747             | 5.4              | 0.515997            |
| 5.5              | 0.07364             | 5.5              | 0.116636            | 5.5              | 1.59674             | 5.5              | 0.451323            |
| 5.6              | 0.105008            | 5.6              | 0.07175             | 5.6              | 1.60318             | 5.6              | 0.386388            |
| 5.7              | 0.134785            | 5.7              | 0.030027            | 5.7              | 1.607742            | 5.7              | 0.321855            |
| 5.8              | 0.163006            | 5.8              | 0.008914            | 5.8              | 1.611144            | 5.8              | 0.258211            |
| 5.9              | 0.189738            | 5.9              | 0.045459            | 5.9              | 1.613914            | 5.9              | 0.195782            |
| 6                | 0.215073            | 6                | 0.079982            | 6                | 1.616429            | 6                | 0.134757            |
| 6.1              | 0.239122            | 6.1              | 0.112845            | 6.1              | 1.618941            | 6.1              | 0.075198            |
| 6.2              | 0.262011            | 6.2              | 0.144393            | 6.2              | 1.621602            | 6.2              | 0.017079            |
| 6.3              | 0.283877            | 6.3              | 0.174946            | 6.3              | 1.62448             | 6.3              | 0.039715            |
| 6.4              | 0.304857            | 6.4              | 0.204805            | 6.4              | 1.627572            | 6.4              | 0.095357            |
| 6.5              | 0.325093            | 6.5              | 0.23425             | 6.5              | 1.630819            | 6.5              | 0.150068            |
| 6.6              | 0.344721            | 6.6              | 0.263537            | 6.6              | 1.634118            | 6.6              | 0.204102            |
| 6.7              | 0.363871            | 6.7              | 0.2929              | 6.7              | 1.637326            | 6.7              | 0.25774             |
| 6.8              | 0.382664            | 6.8              | 0.322554            | 6.8              | 1.640276            | 6.8              | 0.311276            |
| 6.9              | 0.401212            | 6.9              | 0.35269             | 6.9              | 1.642776            | 6.9              | 0.365012            |
| 7                | 0.419615            | 7                | 0.383478            | 7                | 1.644619            | 7                | 0.419249            |
| 7.1              | 0.437961            | 7.1              | 0.415065            | 7.1              | 1.64559             | 7.1              | 0.474288            |
| 7.25             | 0.465534            | 7.25             | 0.464201            | 7.25             | 1.644926            | 7.25             | 0.558967            |
| 7.3              | 0.47477             | 7.3              | 0.481092            | 7.3              | 1.644027            | 7.3              | 0.587891            |
| 7.45             | 0.502698            | 7.45             | 0.533399            | 7.45             | 1.638917            | 7.45             | 0.677175            |
| 7.5              | 0.512094            | 7.5              | 0.551386            | 7.5              | 1.636321            | 7.5              | 0.707857            |
| 7.65             | 0.54059             | 7.65             | 0.606956            | 7.65             | 1.625512            | 7.65             | 0.802948            |
| 7.7              | 0.550196            | 7.7              | 0.625987            | 7.7              | 1.620827            | 7.7              | 0.835705            |
| 7.8              | 0.569571            | 7.8              | 0.664724            | 7.8              | 1.609716            | 7.8              | 0.902856            |
| 7.9              | 0.589161            | 7.9              | 0.704222            | 7.9              | 1.596179            | 7.9              | 0.972183            |
| 8                | 0.608951            | 8                | 0.744268            | 8                | 1.580122            | 8                | 1.043617            |

|       |          |       |          |       |          |       |          |
|-------|----------|-------|----------|-------|----------|-------|----------|
| 8.1   | 0.62892  | 8.1   | 0.784591 | 8.1   | 1.561497 | 8.1   | 1.117016 |
| 8.2   | 0.649041 | 8.2   | 0.824876 | 8.2   | 1.540309 | 8.2   | 1.192164 |
| 8.3   | 0.669277 | 8.3   | 0.864763 | 8.3   | 1.516621 | 8.3   | 1.268773 |
| 8.4   | 0.689587 | 8.4   | 0.903867 | 8.4   | 1.490553 | 8.4   | 1.3465   |
| 8.5   | 0.709927 | 8.5   | 0.941786 | 8.5   | 1.462287 | 8.5   | 1.424955 |
| 8.6   | 0.730245 | 8.6   | 0.978123 | 8.6   | 1.432059 | 8.6   | 1.503723 |
| 8.7   | 0.750489 | 8.7   | 1.012499 | 8.7   | 1.400149 | 8.7   | 1.582385 |
| 8.8   | 0.770604 | 8.8   | 1.044575 | 8.8   | 1.366873 | 8.8   | 1.660535 |
| 8.9   | 0.790531 | 8.9   | 1.074064 | 8.9   | 1.332562 | 8.9   | 1.737802 |
| 9     | 0.810213 | 9     | 1.100736 | 9     | 1.297559 | 9     | 1.81386  |
| 9.1   | 0.829592 | 9.1   | 1.124428 | 9.1   | 1.262189 | 9.1   | 1.888444 |
| 9.2   | 0.848609 | 9.2   | 1.14504  | 9.2   | 1.226759 | 9.2   | 1.961346 |
| 9.3   | 0.867207 | 9.3   | 1.162535 | 9.3   | 1.191547 | 9.3   | 2.032419 |
| 9.43  | 0.890668 | 9.43  | 1.180651 | 9.43  | 1.146485 | 9.43  | 2.121934 |
| 9.5   | 0.902929 | 9.5   | 1.188285 | 9.5   | 1.122693 | 9.5   | 2.168758 |
| 9.66  | 0.929863 | 9.66  | 1.200394 | 9.66  | 1.069888 | 9.66  | 2.27217  |
| 9.7   | 0.936343 | 9.7   | 1.202309 | 9.7   | 1.057071 | 9.7   | 2.297249 |
| 9.87  | 0.962657 | 9.87  | 1.205815 | 9.87  | 1.004491 | 9.87  | 2.400504 |
| 9.93  | 0.971445 | 9.93  | 1.205365 | 9.93  | 0.986694 | 9.93  | 2.435701 |
| 10    | 0.981355 | 10    | 1.203803 | 10    | 0.966447 | 10    | 2.475979 |
| 10.1  | 0.994848 | 10.1  | 1.199747 | 10.1  | 0.93849  | 10.1  | 2.532103 |
| 10.25 | 1.013571 | 10.25 | 1.189974 | 10.25 | 0.89868  | 10.25 | 2.613327 |
| 10.3  | 1.019396 | 10.3  | 1.185814 | 10.3  | 0.885967 | 10.3  | 2.639651 |
| 10.43 | 1.033545 | 10.43 | 1.173091 | 10.43 | 0.854186 | 10.43 | 2.706438 |
| 10.52 | 1.042486 | 10.52 | 1.162803 | 10.52 | 0.833229 | 10.52 | 2.751338 |
| 10.66 | 1.054987 | 10.66 | 1.144662 | 10.66 | 0.802251 | 10.66 | 2.819139 |
| 10.7  | 1.058243 | 10.7  | 1.139045 | 10.7  | 0.793751 | 10.7  | 2.838075 |
| 10.85 | 1.0692   | 10.85 | 1.116456 | 10.85 | 0.76319  | 10.85 | 2.907448 |
| 11    | 1.078188 | 11    | 1.091748 | 11    | 0.734599 | 11    | 2.974377 |
| 11.1  | 1.0831   | 11.1  | 1.074274 | 11.1  | 0.71656  | 11.1  | 3.017721 |
| 11.25 | 1.088875 | 11.25 | 1.046797 | 11.25 | 0.690935 | 11.25 | 3.080938 |
| 11.3  | 1.090383 | 11.3  | 1.037344 | 11.3  | 0.682753 | 11.3  | 3.101543 |
| 11.4  | 1.092786 | 11.4  | 1.018052 | 11.4  | 0.666906 | 11.4  | 3.142117 |
| 11.56 | 1.094972 | 11.56 | 0.986282 | 11.56 | 0.642896 | 11.56 | 3.205271 |
| 11.6  | 1.095208 | 11.6  | 0.978191 | 11.6  | 0.637139 | 11.6  | 3.220736 |
| 11.75 | 1.095024 | 11.75 | 0.947429 | 11.75 | 0.616367 | 11.75 | 3.277629 |
| 11.8  | 1.094597 | 11.8  | 0.937049 | 11.8  | 0.609717 | 11.8  | 3.296218 |
| 11.99 | 1.09138  | 11.99 | 0.897176 | 11.99 | 0.585615 | 11.99 | 3.36523  |
| 12.1  | 1.088415 | 12.1  | 0.87387  | 12.1  | 0.572452 | 12.1  | 3.404052 |
| 12.21 | 1.084683 | 12.21 | 0.85047  | 12.21 | 0.559826 | 12.21 | 3.442079 |
| 12.3  | 1.081085 | 12.3  | 0.831287 | 12.3  | 0.549874 | 12.3  | 3.47262  |
| 12.46 | 1.073544 | 12.46 | 0.797183 | 12.46 | 0.532968 | 12.46 | 3.525682 |
| 12.5  | 1.07144  | 12.5  | 0.788667 | 12.5  | 0.52889  | 12.5  | 3.538706 |
| 12.64 | 1.063424 | 12.64 | 0.758937 | 12.64 | 0.515059 | 12.64 | 3.583553 |
| 12.7  | 1.059691 | 12.7  | 0.746243 | 12.7  | 0.509334 | 12.7  | 3.602426 |
| 12.82 | 1.051721 | 12.82 | 0.720963 | 12.82 | 0.498223 | 12.82 | 3.639556 |

|       |          |       |          |       |          |       |          |
|-------|----------|-------|----------|-------|----------|-------|----------|
| 12.9  | 1.046051 | 12.9  | 0.704205 | 12.9  | 0.491058 | 12.9  | 3.663859 |
| 13    | 1.038585 | 13    | 0.683383 | 13    | 0.482359 | 13    | 3.693735 |
| 13.1  | 1.030721 | 13.1  | 0.662714 | 13.1  | 0.473932 | 13.1  | 3.723055 |
| 13.26 | 1.017373 | 13.26 | 0.630004 | 13.26 | 0.46098  | 13.26 | 3.768813 |
| 13.3  | 1.013898 | 13.3  | 0.6219   | 13.3  | 0.457839 | 13.3  | 3.780029 |
| 13.46 | 0.99949  | 13.46 | 0.589808 | 13.46 | 0.445639 | 13.46 | 3.824    |
| 13.5  | 0.995767 | 13.5  | 0.58187  | 13.5  | 0.442675 | 13.5  | 3.834768 |
| 13.64 | 0.982391 | 13.64 | 0.554361 | 13.64 | 0.432563 | 13.64 | 3.871731 |
| 13.7  | 0.976502 | 13.7  | 0.542709 | 13.7  | 0.428348 | 13.7  | 3.887224 |
| 13.85 | 0.961407 | 13.85 | 0.513954 | 13.85 | 0.418101 | 13.85 | 3.925025 |
| 13.92 | 0.954194 | 13.92 | 0.500723 | 13.92 | 0.413455 | 13.92 | 3.942201 |
| 14    | 0.945829 | 14    | 0.485755 | 14    | 0.408247 | 14    | 3.961459 |
| 14.69 | 0.869579 | 14.69 | 0.363705 | 14.69 | 0.367218 | 14.69 | 4.109887 |
| 14.82 | 0.854626 | 14.82 | 0.342188 | 14.82 | 0.360164 | 14.82 | 4.133983 |
| 15    | 0.833735 | 15    | 0.313195 | 15    | 0.350698 | 15    | 4.16511  |
| 16.25 | 0.68722  | 16.25 | 0.137872 | 16.25 | 0.292742 | 16.25 | 4.297823 |
| 16.42 | 0.667597 | 16.42 | 0.117544 | 16.42 | 0.285711 | 16.42 | 4.303003 |
| 16.67 | 0.639043 | 16.67 | 0.089157 | 16.67 | 0.275671 | 16.67 | 4.304363 |
| 16.83 | 0.620986 | 16.83 | 0.071921 | 16.83 | 0.269422 | 16.83 | 4.301219 |
| 17    | 0.602012 | 18.33 | 0.056016 | 17    | 0.262927 | 17    | 4.294354 |
| 18.33 | 0.462676 | 18.53 | 0.068772 | 18.33 | 0.216491 | 18.33 | 4.111642 |
| 18.53 | 0.443332 | 18.79 | 0.083973 | 18.53 | 0.210099 | 18.53 | 4.064541 |
| 18.79 | 0.41888  | 18.93 | 0.091534 | 18.79 | 0.20199  | 18.79 | 3.996062 |
| 18.93 | 0.406046 | 19.76 | 0.128061 | 18.93 | 0.197715 | 18.93 | 3.955923 |
| 19.76 | 0.334929 | 19.92 | 0.1336   | 19.76 | 0.173603 | 19.76 | 3.675494 |
| 19.92 | 0.32222  | 20.11 | 0.139608 | 19.92 | 0.169183 | 19.92 | 3.614085 |
| 20.11 | 0.307556 | 20.33 | 0.145828 | 20.11 | 0.164026 | 20.11 | 3.538564 |
| 20.33 | 0.291157 | 20.58 | 0.151999 | 20.33 | 0.158176 | 20.33 | 3.447952 |
| 20.58 | 0.273279 | 20.74 | 0.155479 | 20.58 | 0.151683 | 20.58 | 3.341398 |
| 20.74 | 0.26226  | 20.95 | 0.159528 | 20.74 | 0.147612 | 20.74 | 3.271499 |
| 20.95 | 0.248297 | 21.12 | 0.162403 | 20.95 | 0.142369 | 20.95 | 3.178081 |
| 21.12 | 0.237402 | 21.36 | 0.165888 | 21.12 | 0.138206 | 21.12 | 3.10131  |
| 21.36 | 0.222643 | 21.82 | 0.1709   | 21.36 | 0.132452 | 21.36 | 2.991617 |
| 21.82 | 0.196348 | 22.44 | 0.174788 | 21.82 | 0.121828 | 21.82 | 2.778977 |
| 22.44 | 0.164898 | 23.1  | 0.176192 | 22.44 | 0.108343 | 22.44 | 2.492962 |
| 23.1  | 0.136126 | 23.43 | 0.176114 | 23.1  | 0.095049 | 23.1  | 2.197178 |
| 23.43 | 0.123426 | 23.65 | 0.175838 | 23.43 | 0.088817 | 23.43 | 2.054953 |
| 23.65 | 0.115543 | 23.85 | 0.175456 | 23.65 | 0.084818 | 23.65 | 1.962734 |
| 23.85 | 0.108765 | 24    | 0.175099 | 23.85 | 0.08129  | 23.85 | 1.880873 |
| 24    | 0.103914 | 24.33 | 0.174134 | 24    | 0.07871  | 24    | 1.820778 |
| 24.33 | 0.093914 | 24.56 | 0.173341 | 24.33 | 0.07324  | 24.33 | 1.692695 |
| 24.56 | 0.087464 | 24.74 | 0.172666 | 24.56 | 0.069591 | 24.56 | 1.606914 |
| 24.74 | 0.082702 | 24.95 | 0.171831 | 24.74 | 0.066829 | 24.74 | 1.541839 |
| 24.95 | 0.077444 | 25.13 | 0.17108  | 24.95 | 0.063712 | 24.95 | 1.468243 |
| 25.13 | 0.073182 | 25.35 | 0.170128 | 25.13 | 0.061127 | 25.13 | 1.407171 |
| 25.35 | 0.068266 | 25.55 | 0.169239 | 25.35 | 0.058077 | 25.35 | 1.335063 |

|       |          |       |          |       |          |       |          |
|-------|----------|-------|----------|-------|----------|-------|----------|
| 25.55 | 0.064061 | 25.75 | 0.168338 | 25.55 | 0.055408 | 25.55 | 1.271927 |
| 25.75 | 0.060104 | 25.95 | 0.167425 | 25.75 | 0.052836 | 25.75 | 1.211092 |
| 25.95 | 0.056374 | 26.13 | 0.1666   | 25.95 | 0.050359 | 25.95 | 1.152528 |
| 26.13 | 0.053203 | 26.39 | 0.16541  | 26.13 | 0.048211 | 26.13 | 1.101754 |
| 26.39 | 0.048918 | 26.52 | 0.164815 | 26.39 | 0.045238 | 26.39 | 1.031591 |
| 26.52 | 0.0469   | 26.73 | 0.163863 | 26.52 | 0.043809 | 26.52 | 0.997893 |
| 26.73 | 0.043803 | 26.92 | 0.163012 | 26.73 | 0.041578 | 26.73 | 0.945372 |
| 26.92 | 0.041173 | 27.19 | 0.16182  | 26.92 | 0.039645 | 26.92 | 0.899846 |
| 27.19 | 0.037689 | 27.36 | 0.161083 | 27.19 | 0.037027 | 27.19 | 0.838334 |
| 27.36 | 0.035645 | 27.55 | 0.160272 | 27.36 | 0.035455 | 27.36 | 0.80147  |
| 27.55 | 0.033484 | 27.74 | 0.159476 | 27.55 | 0.033766 | 27.55 | 0.761918 |
| 27.74 | 0.031444 | 27.99 | 0.158455 | 27.74 | 0.032147 | 27.74 | 0.724058 |
| 27.99 | 0.028953 | 28.19 | 0.157657 | 27.99 | 0.030119 | 27.99 | 0.676754 |
| 28.19 | 0.027091 | 28.3  | 0.157226 | 28.19 | 0.028579 | 28.19 | 0.640888 |
| 28.3  | 0.02612  | 28.5  | 0.156458 | 28.3  | 0.027761 | 28.3  | 0.621885 |
| 28.5  | 0.024437 | 28.7  | 0.15571  | 28.5  | 0.026329 | 28.5  | 0.588609 |
| 28.7  | 0.02286  | 28.9  | 0.154981 | 28.7  | 0.024962 | 28.7  | 0.556936 |
| 28.9  | 0.021382 | 29.1  | 0.154272 | 28.9  | 0.023659 | 28.9  | 0.526798 |
| 29.1  | 0.019994 | 29.3  | 0.153582 | 29.1  | 0.022417 | 29.1  | 0.498146 |
| 29.3  | 0.018694 | 29.5  | 0.15291  | 29.3  | 0.021236 | 29.3  | 0.470906 |
| 29.5  | 0.017482 | 29.7  | 0.152256 | 29.5  | 0.020111 | 29.5  | 0.445035 |
| 29.7  | 0.016344 | 29.8  | 0.151937 | 29.7  | 0.019041 | 29.7  | 0.420471 |
| 29.8  | 0.015801 | 30.5  | 0.149824 | 29.8  | 0.018525 | 29.8  | 0.408661 |
| 30.5  | 0.01247  | 30.9  | 0.148708 | 30.5  | 0.015263 | 30.5  | 0.334192 |
| 30.9  | 0.010885 | 31.1  | 0.148175 | 30.9  | 0.013647 | 30.9  | 0.297527 |
| 31.1  | 0.01017  | 31.25 | 0.147784 | 31.1  | 0.012902 | 31.1  | 0.280641 |
| 31.25 | 0.009659 | 31.53 | 0.147078 | 31.25 | 0.012369 | 31.25 | 0.268571 |
| 31.53 | 0.008778 | 31.76 | 0.146521 | 31.53 | 0.011425 | 31.53 | 0.247342 |
| 31.76 | 0.008114 | 31.96 | 0.146049 | 31.76 | 0.010704 | 31.76 | 0.2311   |
| 31.96 | 0.007577 | 32.14 | 0.145636 | 31.96 | 0.010111 | 31.96 | 0.217804 |
| 32.14 | 0.007122 | 32.34 | 0.145189 | 32.14 | 0.009605 | 32.14 | 0.206461 |
| 32.34 | 0.006654 | 32.56 | 0.144714 | 32.34 | 0.00907  | 32.34 | 0.194523 |
| 32.56 | 0.006163 | 32.73 | 0.144355 | 32.56 | 0.008516 | 32.56 | 0.182145 |
| 32.73 | 0.00581  | 32.91 | 0.143985 | 32.73 | 0.008111 | 32.73 | 0.173103 |
| 32.91 | 0.005459 | 33.14 | 0.143527 | 32.91 | 0.007701 | 32.91 | 0.163995 |
| 33.14 | 0.005044 | 33.26 | 0.143292 | 33.14 | 0.007206 | 33.14 | 0.15302  |
| 33.26 | 0.004835 | 33.52 | 0.142796 | 33.26 | 0.006962 | 33.26 | 0.147587 |
| 33.52 | 0.004422 | 33.64 | 0.142577 | 33.52 | 0.006456 | 33.52 | 0.136431 |
| 33.64 | 0.004233 | 33.93 | 0.142056 | 33.64 | 0.006236 | 33.64 | 0.13156  |
| 33.93 | 0.003824 | 34.04 | 0.141862 | 33.93 | 0.005734 | 33.93 | 0.120487 |
| 34.04 | 0.003681 | 34.25 | 0.141502 | 34.04 | 0.005554 | 34.04 | 0.11651  |
| 34.25 | 0.003419 | 34.42 | 0.141219 | 34.25 | 0.005227 | 34.25 | 0.109289 |
| 34.42 | 0.003218 | 34.63 | 0.140877 | 34.42 | 0.004973 | 34.42 | 0.103765 |
| 34.63 | 0.002989 | 34.87 | 0.140499 | 34.63 | 0.004678 | 34.63 | 0.09731  |
| 34.87 | 0.002742 | 35.04 | 0.140239 | 34.87 | 0.004361 | 34.87 | 0.090407 |
| 35.04 | 0.00258  | 35.32 | 0.139819 | 35.04 | 0.004156 | 35.04 | 0.08581  |

|       |          |       |          |       |          |       |          |
|-------|----------|-------|----------|-------|----------|-------|----------|
| 35.32 | 0.002338 | 35.53 | 0.139515 | 35.32 | 0.003824 | 35.32 | 0.07873  |
| 35.53 | 0.002166 | 35.76 | 0.139192 | 35.53 | 0.003595 | 35.53 | 0.073788 |
| 35.76 | 0.001993 | 35.88 | 0.139026 | 35.76 | 0.003362 | 35.76 | 0.06873  |
| 35.88 | 0.001906 | 36.26 | 0.138521 | 35.88 | 0.003252 | 35.88 | 0.066227 |
| 36.26 | 0.001663 | 36.53 | 0.138177 | 36.26 | 0.002904 | 36.26 | 0.058864 |
| 36.53 | 0.001505 | 36.87 | 0.137757 | 36.53 | 0.002682 | 36.53 | 0.05412  |
| 36.87 | 0.00133  | 37    | 0.137605 | 36.87 | 0.002429 | 36.87 | 0.048678 |
| 37    | 0.001264 | 37.7  | 0.136811 | 37    | 0.002337 | 37    | 0.046745 |
| 37.7  | 0.000977 | 37.8  | 0.136705 | 37.7  | 0.001901 | 37.7  | 0.03754  |
| 37.8  | 0.000936 | 38.3  | 0.136181 | 37.8  | 0.001847 | 37.8  | 0.036381 |
| 38.3  | 0.000772 | 38.7  | 0.135789 | 38.3  | 0.001593 | 38.3  | 0.031081 |
| 38.7  | 0.000664 | 38.9  | 0.135598 | 38.7  | 0.001415 | 38.7  | 0.027382 |
| 38.9  | 0.00061  | 39.04 | 0.135467 | 38.9  | 0.001334 | 38.9  | 0.02569  |
| 39.04 | 0.000584 | 39.23 | 0.135293 | 39.04 | 0.001279 | 39.04 | 0.024583 |
| 39.23 | 0.000539 | 39.46 | 0.135087 | 39.23 | 0.001209 | 39.23 | 0.023143 |
| 39.46 | 0.000495 | 39.77 | 0.134819 | 39.46 | 0.001131 | 39.46 | 0.021507 |
| 39.77 | 0.000431 | 39.99 | 0.134635 | 39.77 | 0.001029 | 39.77 | 0.01948  |
| 39.99 | 0.00039  | 40.06 | 0.134576 | 39.99 | 0.000966 | 39.99 | 0.018162 |
| 40.06 | 0.000385 | 41    | 0.133843 | 40.06 | 0.000944 | 40.06 | 0.017753 |
| 41    | 0.000256 | 42.3  | 0.132946 | 41    | 0.000712 | 41    | 0.013118 |
| 42.3  | 0.000148 | 43.2  | 0.132395 | 42.3  | 0.00048  | 42.3  | 0.008585 |
| 43.2  | 9.8e-05  | 44    | 0.131948 | 43.2  | 0.000363 | 43.2  | 0.006385 |
| 44    | 7.2e-05  | 46.6  | 0.130723 | 44    | 0.000283 | 44    | 0.004899 |
| 46.6  | 1.7e-05  | 47.8  | 0.130258 | 46.6  | 0.000124 | 46.6  | 0.002037 |
| 47.8  | 8.00E-06 | 48.23 | 0.130102 | 47.8  | 8.3e-05  | 47.8  | 0.001354 |
| 48.23 | 2.00E-06 | 49.3  | 0.129744 | 48.23 | 7.2e-05  | 48.23 | 0.001162 |
| 49.3  | 1.00E-06 | 50.32 | 0.129434 | 49.3  | 5.1e-05  | 49.3  | 0.000801 |
| 50.32 | 2.00E-06 |       |          | 50.32 | 3.6e-05  | 50.32 | 0.000559 |
